# Supplementary material for: Munition Piles in the German Baltic Sea: Inventory and Maritime Hazard Perspectives
Source: Copernicus journal article supplement (doi:10.5194/essd-2025-795), 2026-02-23
Supplement: Supplementary file 1 [file Supplement 1_Dataset B_Detailed Subset of Munition Pile Inventory in the German Baltic Sea.xlsx]

## Sheet: 1. Dataset B
	ID	Variability of the pile	Variability of the pile (rank)	Number of objects	Number of objects (rank)	Number of objects (log-log regression adjusted)	Number of objects (deviation in log-space (epsilon))	Layering of objects	Layering of objects (rank)	State of the fuze	State of the fuze (rank)	Largest object size [m]	Largest object size (rank)	Median object size [m]	Median object size (rank)	State of corrosion of the casing	State of corrosion of the casing (rank)	Burial state	Burial state (rank)	Area [m²]	Area (rank)	Number of objects/Area	Number of objects/Area (rank)
	Haf_00002	1.83333	22	664	37	631.878	0.0495857	2.25	29	0	1	0.736667	4	0.548333	12	1.25	1	1.5	2	263.416	26	2.52073	34
	Haf_00314	1.75	16	178.333	22	365.844	-0.718551	2.25	29	1	2	0.575	2	0.425	7	1.5	7	1.75	5	77.251	9	2.30849	32
	Haf_00315	2.25	29	383.667	30	503.046	-0.270908	2.25	29	1	2	1.63	36	0.38	4	1.5	7	1.75	5	129.162	16	2.97043	35
	Haf_00316	2	23	165.333	21	354.512	-0.762777	2.25	29	1	2	0.93	8	0.415	6	1.5	7	1.75	5	47.404	5	3.48775	36
	Haf_00318	2.75	32	432	31	528.48	-0.20158	2.5	33	1	2	1.32667	28	0.853333	23	1.75	19	1.75	5	181.056	19	2.386	33
	Haf_00319	2	23	498.667	34	560.968	-0.117725	2	25	1	2	0.78	5	0.515	10	1.5	7	1.75	5	440.17	36	1.1329	26
	Haf_00320	1.75	16	443.667	32	534.367	-0.186009	2.5	33	1	2	0.955	11	0.625	16	1.5	7	1.75	5	289.721	27	1.53136	29
	Haf_00323	3.75	37	552.667	35	585.464	-0.0576492	2.5	33	1	2	1.25667	26	0.613333	15	3.25	35	1.75	5	1259.02	38	0.438966	18
	Haf_00324	2.25	29	592.333	36	602.579	-0.0171488	2.5	33	1	2	0.925	7	0.48	9	2	26	1.75	5	293.607	28	2.01744	31
	Haf_00332	2	23	258.333	27	426.777	-0.502012	2	25	1	2	0.65	3	0.363333	3	1.5	7	2	15	70.169	7	3.68159	37
	Kbh_00001	3.75		227.167				2		1.25		2.88667		1.46667		4.25		1		1361.06		0.166904
	Pzh_00002	0.5	3	40.8333	13	10.2981	1.37754	1	7	1	2	1.19333	17	1.09167	33	1.25	1	1.25	1	112.573	13	0.362728	14
	Pzh_00009	1.5	15	114	20	40.8327	1.02672	1.75	23	1	2	0.395	1	0.325	1	1.5	7	2	15	125.467	14	0.908605	24
	Pzh_00012	2	23	355.667	29	187.929	0.637932	1.5	15	1	2	1.46333	35	0.608333	14	1.25	1	2	15	200.677	22	1.77233	30
	Pzh_00032	3.25	36	230.333	25	104.914	0.786389	1.75	23	1	2	1.28333	27	1.02667	28	1.5	7	1.75	5	316.551	30	0.727634	21
	Pzh_00035	1.75	16	488	33	287.284	0.529845	1.66667	22	1	2	1.025	12	0.4125	5	1.875	25	1.875	14	338.583	32	1.4413	28
	Pzh_00037	3.75	37	202	23	87.9728	0.83124	2	25	1	2	0.94	9	0.666667	18	2.5	31	2	15	354.412	34	0.569958	19
	Pzh_00066	1.75	16	9.33333	4	1.42153	1.88186	1.25	12	1	2	0.86	6	0.83	21	1.75	19	2	15	21.618	1	0.431739	17
	Pzh_00107	0.875	10	15.5	6	2.80754	1.70853	1	7	1	2	1.355	29	1.095	34	2.75	32	2.125	27	63.541	6	0.243937	11
	Pzh_00108	0.75	8	3	1	0.310036	2.26968	1	7	1	2	1.20333	20	1.14333	37	2.75	32	1.625	4	23.384	2	0.128293	4
	Pzh_00109	0.5	3	7.66667	3	1.09178	1.94907	0.75	5	1	2	1.45	33	1.18333	38	3.5	38	2	15	33.157	3	0.231223	9
	Pzh_00122	3	35	229	24	104.1	0.788373	1.5	15	1	2	1.41333	32	0.82	20	3	34	2.25	28	298.135	29	0.768108	22
	Pzh_00126	2.25	29	29.3333	9	6.6072	1.49057	0.75	5	1	2	1.37	30	0.52	11	3.25	35	2.25	28	73.427	8	0.39949	16
	Pzh_00127	1.75	16	27	8	5.91179	1.51889	0.5	4	1	2	1.40333	31	0.665	17	3.25	35	2	15	33.494	4	0.806115	23
	Pzh_00155	0.25	1	9.66667	5	1.49006	1.86987	0.25	1	1	2	1.21	21	1.02333	27	1.25	1	1.5	2	103.566	12	0.0933382	2
	Pzh_00185	0.5	3	53.3333	15	14.7358	1.28628	1.25	12	1	2	1.22333	23	1.04	29	1.5	7	2.25	28	147.081	17	0.362612	13
	Pzh_00186	0.5	3	53.3333	15	14.7358	1.28628	1.5	15	1	2	1.19167	16	1.10333	35	1.5	7	2.25	28	236.732	25	0.22529	8
	Pzh_00187	1	11	31.3333	10	7.21856	1.46803	1.5	15	1	2	1.21667	22	1.07667	30	2.25	28	2	15	187.714	21	0.166921	5
	Pzh_00192	0.75	8	41.3333	14	10.4676	1.37338	1	7	1	2	1.23333	25	1.07667	31	2	26	2	15	125.85	15	0.328433	12
	Pzh_00200	0.25	1	38.6667	12	9.57168	1.39617	1	7	1	2	1.19333	17	1.08667	32	1.75	19	2	15	326.511	31	0.118424	3
	Pzh_00202	1.25	13	32.3333	11	7.52933	1.45729	1.25	12	1	2	2.02	37	1.12333	36	1.75	19	2.5	33	155.737	18	0.207615	7
	Pzh_00219	2	23	238.333	26	109.832	0.774722	2	25	1	2	1.19	15	0.455	8	1.25	1	2.5	33	209.586	23	1.13716	27
	Pzh_00222	2.75	32	3978	38	4796.55	-0.187117	2.5	33	1.5	38	2.02333	38	0.716667	19	2.25	28	2.5	33	1078.63	37	3.68802	38
	Pzh_00241	2	23	84	19	27.1059	1.13107	1.5	15	1	2	1.455	34	0.83	22	1.75	19	2.75	38	230.194	24	0.36491	15
	Pzh_00242	2.75	32	346	28	181.108	0.647347	2.5	33	1	2	0.946667	10	0.556667	13	2.25	28	2.5	33	353.605	33	0.978493	25
	Pzh_00266	0.5	3	22.3333	7	4.58299	1.58373	0.25	1	1	2	1.22667	24	0.92	25	1.25	1	2	15	94.762	11	0.235678	10
	Pzh_00269	1.25	13	55	17	15.3569	1.27577	1.5	15	1	2	1.13	14	0.345	2	1.5	7	2.5	33	84.702	10	0.649335	20
	Pzh_00287	1	11	6	2	0.785785	2.03283	0.25	1	1	2	1.11667	13	0.916667	24	1.75	19	2	15	182.245	20	0.0329227	1
	Pzh_02219	1.75	16	71.3333	18	21.7681	1.18692	1.5	15	1	2	1.19667	19	0.933333	26	1.5	7	2.25	28	418.291	35	0.170535	6
	Overall
	Mean overall	1.74893		287.406				1.56838		0.99359		1.22		0.776303		1.97756		1.97756		265.186		1.03061
	Stdev overall	0.98288		636.351				0.682882		0.185734		0.427998		0.298613		0.748832		0.359175		307.007		1.07648
	Mean + 3Stdev overall	4.69757		2196.46				3.61702		1.55079		2.50399		1.67214		4.22406		3.05509		1186.21		4.26005
	Median overall	1.75		114				1.5		1		1.20333		0.82		1.75		2		182.245		0.569958
	IQR (upper boundary) overall	4.21875		829.333				3.8125		1		1.98		1.86958		3.375		3		633.759		3.36565
	IQR (lower boundary) overall	-1.03125		-446.667				-0.6875		1		0.333333		-0.29375		0.375		1		-236.684		-1.64587
	Q1 overall	0.9375		31.8333				1		1		0.950833		0.5175		1.5		1.75		89.732		0.233451
	Q3 overall	2.25		350.833				2.125		1		1.3625		1.05833		2.25		2.25		307.343		1.48633
	Min overall	0.25		3				0.25		0		0.395		0.325		1.25		1		21.618		0.0329227
	Max overall	3.75		3978				2.5		1.5		2.88667		1.46667		4.25		2.75		1361.06		3.68802
	Count		38		38				38		38		38		38		38		38		38		38
	Haffkrug
	Mean Haf	2.23333		416.9				2.3		0.9		0.9765		0.521833		1.725		1.75		305.098		2.24756
	StDev Haf	0.610859		171.382				0.197203		0.316228		0.332897		0.148113		0.570696		0.117851		357.487		1.0162
	StErr Haf	0.19317		54.1957				0.062361		0.1		0.105271		0.0468373		0.18047		0.0372678		113.047		0.32135
	Median Haf	2		437.833				2.25		1		0.9275		0.4975		1.5		1.75		222.236		2.34725
	Q1 Haf	1.875		289.667				2.25		1		0.7475		0.4175		1.5		1.75		90.2288		1.65288
	Q3 Haf	2.25		539.167				2.5		1		1.18125		0.597083		1.6875		1.75		292.636		2.858
	IQR (upper boundary) Haf	2.8125		913.417				2.875		1		1.83188		0.866458		1.96875		1.75		596.246		4.66569
	IQR (lower boundary) Haf	1.3125		-84.5833				1.875		1		0.096875		0.148125		1.21875		1.75		-213.381		-0.154812
	Mean - Stdev Haf	2.04016		362.704				2.23764		0.8		0.871229		0.474996		1.54453		1.71273		192.05		1.92621
	Mean + Stdev Haf	2.4265		471.096				2.36236		1		1.08177		0.568671		1.90547		1.78727		418.145		2.56891
	Min Haf	1.75		165.333				2		0		0.575		0.363333		1.25		1.5		47.404		0.438966
	Max Haf	3.75		664				2.5		1		1.63		0.853333		3.25		2		1259.02		3.68159
	Sum Haf			4169
	Residual scatter Haf						0.3048
	Kolberger Heide
	Mean Kbh	3.75		227.167				2		1.25		2.88667		1.46667		4.25		1		1361.06		0.166904
	Pelzerhaken
	Mean Pzh	1.50446		243.31				1.29167		1.01786		1.24744		0.84253		1.98661		2.09375		211.794		0.626827
	StDev Pzh	0.955123		129.083				0.560678		0		0.273682		0.272286		0.693407		0.325495		116.938		0.434213
	StErr Pzh	0.183813		24.842				0.107903		0		0.0526701		0.0524015		0.133446		0.0626416		22.5047		0.0835644
	Median Pzh	1.375		47.3333				1.375		1		1.21333		0.918333		1.75		2		168.991		0.363819
	IQR (upper boundary) Pzh	3.96875		483.125				2.35417		1		1.68333		1.72167		3.53125		2.625		618.477		1.61272
	IQR (lower boundary) Pzh	-1.28125		-248.542				0.1875		1		0.87		0.00833333		0.28125		1.625		-223.491		-0.614237
	Q1 Pzh	0.6875		25.8333				1		1		1.175		0.650833		1.5		25		92.247		0.220871
	Q3 Pzh	2		208.75				1.54167		1		1.37833		1.07917		2.3125		2.25		302.739		0.77761
	Mean - Stdev Pzh	1.32065		218.468				1.18376		1.01786		1.19477		0.790128		1.85316		2.03111		189.289		0.543262
	Mean + Stdev Pzh	1.68828		268.151				1.39957		1.01786		1.30011		0.894931		2.12005		2.15639		234.298		0.710391
	Min Pzh	0.25		3				0.25		1		0.395		0.325		1.25		1.25		21.618		0.0329227
	Max Pzh	3.75		3978				2.5		1.5		2.02333		1.18333		3.5		2.75		1078.63		3.68802
	Residual scatter Pzh						0.545509
	Mann-Whitney-U-Test (Haf vs. Pzh)
	Count Haf		10		10				10		10		10		10		10		10		10		10
	Count Pzh		28		28				28		28		28		28		28		28		28		28
	Rangsumme Haf		250		305				298		19		130		105		123		57		211		311
	Rangsumme Pzh		440		435				377		92		610		636		514		561		530		430
	U-Value Haf		85		30				37		316		205		230		212		278		124		24
	U-Value Pzh		246		251				309		594		76		50		172		125		156		256
	z-value		-1.82323		-3.64646				-3.41442		5.83434		-2.12158		-2.98347		1.06079		-0.497245		-0.530395		-3.84536
	p-value (u-test)		0.0682682		0.000265873				0.000639187		5.40029e-09		0.0338731		0.00284999		0.288785		0.619016		0.595838		0.000120374

## Sheet: 2. Expert 1
	ID	Variability of the pile	Number of objects	Layering of objects	State of the fuze	Largest object size	Median object size	State of corrosion of the casing	Burial state	Number of Measurements
	Haf_00002	1.66667	617	3	1	0.723333	0.526667	1	2	50.6667
	Haf_00314	2	154	2	1	0.59	0.43	1	3	29
	Haf_00315	2	375	2	1	1.61	0.41	1	3	33
	Haf_00316	2	150	2	1	1.06	0.46	1	3	20
	Haf_00318	2	483	2	1	1.24	1.02	1	3	52
	Haf_00319	1	519	2	1	0.79	0.59	1	3	20
	Haf_00320	2	456	3	1	0.93	0.77	1	3	40
	Haf_00323	4	632	2	1	1.27	0.64	3	3	52
	Haf_00324	2	517	3	1	0.8	0.51	1	3	44
	Haf_00332	2	226	2	1	0.83	0.42	1	3	30
	Kbh_00001	4	283	3	2	2.83	1.14	5	2	71
	Pzh_00002	0	39.5	0	1	1.205	1.11	1	1	39.5
	Pzh_00009	1	98	2	1	0.4	0.36	1	3	11
	Pzh_00012	2	363	2	1	1.47	0.345	1	3	21
	Pzh_00032	4	277	2	1	1.24	1.16	1	3	13
	Pzh_00035	2	499.5	1.66667	1	1.145	0.395	2.5	3	21.5
	Pzh_00037	4	208	2	1	0.93	0.69	2	3	13
	Pzh_00066	0	6	1	1	1.16	1.16	1	2	1
	Pzh_00107	0	11.5	0.5	1	1.345	1.09	4	2	11.5
	Pzh_00108	0	3	0	1	1.24	1.08	4	2	3
	Pzh_00109	0	6	0	1	1.35	1.27	5	2	5
	Pzh_00122	4	310	1	1	1.3	0.65	4	3	26
	Pzh_00126	4	21	0	1	1.37	0.55	3	3	10
	Pzh_00127	3	13	0	1	1.26	0.65	3	3	4
	Pzh_00155	0	6	0	1	1.2	1.14	1	1	6
	Pzh_00185	0	52	1	1	1.2	1.13	1	3	41
	Pzh_00186	0	54	2	1	1.19	1.13	1	3	48
	Pzh_00187	1	33	1	1	1.16	1.13	3	3	11
	Pzh_00192	0	51	1	1	1.22	1.12	3	3	16
	Pzh_00200	0	37	1	1	1.22	1.15	2	2	20
	Pzh_00202	1	26	1	1	2.03	1.15	2	3	18
	Pzh_00219	2	240	2	1	1.15	0.49	1	3	25
	Pzh_00222	2	3978	3	1	2.01	0.43	1	3	32
	Pzh_00241	3	76	1	1	1.41	0.99	2	3	6
	Pzh_00242	4	410	3	1	0.93	0.5	3	3	31
	Pzh_00266	0	24	0	1	1.16	1.14	1	3	12
	Pzh_00269	1	45	1	1	1.1	0.38	1	3	13
	Pzh_00287	1	5	0	1	1.16	0.96	3	2	2
	Pzh_02219	1	70	1	1	1.24	0.96	1	3	25

## Sheet: 3. Expert 2
	ID	Variability of the pile	Number of objects	Layering of objects	State of the fuze	Largest object size	Median object size	State of corrosion of the casing	Burial state	Number of Measurements
	Haf_00002	1.66667	664	2	1			1	2	0
	Haf_00314	1	150	2	1			1	2	0
	Haf_00315	1	336	2	1	1.63		1	2	1
	Haf_00316	1	132	2	1			1	2	0
	Haf_00318	3	353	3	1	1.42	1.02	2	2	38
	Haf_00319	1	430	2	1			1	2	0
	Haf_00320	1	377	2	1			1	2	0
	Haf_00323	4	413	2	1	1.26	0.58	2	2	183
	Haf_00324	2	597	2	1			1	2	0
	Haf_00332	2	242	2	1	0.34	0.29	1	2	10
	Kbh_00001	4	188	1	1	2.87	1.62	3	0	59
	Pzh_00002	0	39	1	1	1.19	1.045	1	1	39
	Pzh_00009	1	105	1	1			1	2	0
	Pzh_00012	2	341	1	1	1.44	1.17	1	2	4
	Pzh_00032	3	170	2	1	1.28	1.02	1	2	55
	Pzh_00035	2	493.5	2	1	0.96		1	1.5	0.5
	Pzh_00037	4	177	2	1	0.98	0.69	2	2	18
	Pzh_00066	1	6	1	1			1	3	0
	Pzh_00107	0	8.5	1	1	1.41	1.21	3	2.5	7.5
	Pzh_00108	0	1	1	1	1.35	1.35	3	2	1
	Pzh_00109	0	4	1	1	1.66	1.39	3	2	4
	Pzh_00122	3	156	1	1	1.43	1.02	3	2	12
	Pzh_00126	0	11	1	1	1.38		4	2	1
	Pzh_00127	0	13	1	1	1.25		4	2	1
	Pzh_00155	0	6	0	1	1.17	1.12	1	2	6
	Pzh_00185	0	43	1	1	1.25	1	2	2	43
	Pzh_00186	0	50	1	1	1.12	1.03	2	2	50
	Pzh_00187	0	25	1	1	1.11	1.01	2	2	25
	Pzh_00192	0	30	0	1	1.21	1	1	2	30
	Pzh_00200	0	37	0	1	1.15	0.99	1	2	37
	Pzh_00202	0	32	1	1	1.91	1.1	1	2	32
	Pzh_00219	2	200	1	1			1	2	0
	Pzh_00222	2	1297	2	3	1.92	1.14	1	2	33
	Pzh_00241	1	47	1	1			1	2	0
	Pzh_00242	2	287	2	1	0.9	0.76	2	2	19
	Pzh_00266	0	12	0	1	1.09	1.05	1	1	12
	Pzh_00269	1	52	1	1	1.16		1	2	1
	Pzh_00287	1	3	0	1	1.09	1.09	1	2	1
	Pzh_02219	2	69	1	1	1.21	0.97	1	1	19

## Sheet: 4. Expert 3
	ID	Variability of the pile	Number of objects	Layering of objects	State of the fuze	Largest object size	Median object size	State of corrosion of the casing	Burial state	Number of Measurements
	Haf_00002	2	711	2	1	0.75	0.57	2	1	9
	Haf_00314	2	231	2	1	0.56	0.42	3	1	16
	Haf_00315	3	440	2	1	1.65	0.35	2	1	20
	Haf_00316	3	214	2	1	0.8	0.37	2	1	20
	Haf_00318	3	460	2	1	1.32	0.52	2	1	26
	Haf_00319	3	547	2	1	0.77	0.44	2	1	18
	Haf_00320	2	498	2	1	0.98	0.48	2	1	32
	Haf_00323	4	613	3	1	1.24	0.62	4	1	36
	Haf_00324	2	663	2	1	1.05	0.45	3	1	23
	Haf_00332	2	307	2	1	0.78	0.38	2	1	42
	Kbh_00001	4	210.5	2	1	2.96	1.64	5	1	61
	Pzh_00002	1	44	1	1	1.185	1.12	1	1	21
	Pzh_00009	2	139	1	1	0.39	0.29	2	1	18
	Pzh_00012	2	346	1	1	1.48	0.31	2	1	22
	Pzh_00032	3	244	1	1	1.33	0.9	2	1	15
	Pzh_00035	1	471	1	1	0.97	0.43	2	1	16
	Pzh_00037	4	221	1	1	0.91	0.62	3	1	19
	Pzh_00066	2	16	1	1	0.56	0.5	3	1	4
	Pzh_00107	1.5	26.5	0.5	1	1.31	0.985	2	1	12
	Pzh_00108	2	5	1	1	1.02	1	2	1.5	2
	Pzh_00109	1	13	1	1	1.34	0.89	3	2	9
	Pzh_00122	3	221	2	1	1.51	0.79	2	2	22
	Pzh_00126	3	56	1	1	1.36	0.49	3	2	15
	Pzh_00127	2	55	0	1	1.7	0.68	3	1	14
	Pzh_00155	0	17	0	1	1.26	0.81	1	1	10
	Pzh_00185	0	65	1	1	1.22	0.99	1	1	18
	Pzh_00186	0	56	1	1	1.265	1.15	1	1	22
	Pzh_00187	1	36	1	1	1.38	1.09	2	1	7
	Pzh_00192	1	43	1	1	1.27	1.11	2	1	22
	Pzh_00200	0	42	1	1	1.21	1.12	2	2	20
	Pzh_00202	2	39	1	1	2.12	1.12	2	2	14
	Pzh_00219	2	275	2	1	1.23	0.42	2	2	19
	Pzh_00222	3	1386	2	1	2.14	0.58	3	2	21
	Pzh_00241	2	129	2	1	1.5	0.67	2	3	24
	Pzh_00242	2	341	2	1	1.01	0.41	2	2	31
	Pzh_00266	1	31	0	1	1.43	0.57	2	2	18
	Pzh_00269	1	68	2	1	1.13	0.31	2	2	10
	Pzh_00287	0	10	0	1	1.1	0.7	1	1	6
	Pzh_02219	2	75	2	1	1.14	0.87	2	3	15

## Sheet: 5. Expert 4
	ID	Variability of the pile	Layering of objects	State of the fuze	State of corrosion of the casing	Burial state
	Haf_00002	2	2	1	1	1
	Haf_00314	2	3	1	1	1
	Haf_00315	3	3	1	2	1
	Haf_00316	2	3	1	2	1
	Haf_00318	3	3	1	2	1
	Haf_00319	3	2	1	2	1
	Haf_00320	2	3	1	2	1
	Haf_00323	3	3	1	4	1
	Haf_00324	3	3	1	3	1
	Haf_00332	2	2	1	2	2
	Kbh_00001	3	2	1	4	1
	Pzh_00002	1	2	1	2	2
	Pzh_00009	2	3	1	2	2
	Pzh_00012	2	2	1	1	2
	Pzh_00032	3	2	1	2	1
	Pzh_00035	2	2	1	2	2
	Pzh_00037	3	3	1	3	2
	Pzh_00066	4	2	1	2	2
	Pzh_00107	2	2	1	2	3
	Pzh_00108	1	2	1	2	1
	Pzh_00109	1	1	1	3	2
	Pzh_00122	2	2	1	3	2
	Pzh_00126	2	1	1	3	2
	Pzh_00127	2	1	1	3	2
	Pzh_00155	1	1	1	2	2
	Pzh_00185	2	2	1	2	3
	Pzh_00186	2	2	1	2	3
	Pzh_00187	2	3	1	2	2
	Pzh_00192	2	2	1	2	2
	Pzh_00200	1	2	1	2	2
	Pzh_00202	2	2	1	2	3
	Pzh_00219	2	3	1	1	3
	Pzh_00222	4	3	1	4	3
	Pzh_00241	2	2	1	2	3
	Pzh_00242	3	3	1	2	3
	Pzh_00266	1	1	1	1	2
	Pzh_00269	2	2	1	2	3
	Pzh_00287	2	1	1	2	3
	Pzh_02219	2	2	1	2	2

## Sheet: 6. Distributions
	Variability of the pile
	Meaning	Comment	Class	Number	Percentage
	0 None		0	2	0.0512821
	1 Very Weak	Only one or two objects differ from the main type; two types of boxes	1	12	0.307692
	2 Weak	E.g., several types of boxes	2	17	0.435897
	3 Medium		3	5	0.128205
	4 Strong	Very disorderly	4	3	0.0769231
	Number of objects
	Meaning	Comment	Class	Number	Percentage
	(1, 100]			19	0.487179
	(100, 200]			3	0.0769231
	(200, 300]			6	0.153846
	(300, 400]			3	0.0769231
	(400, 500]			4	0.102564
	> 600			4	0.102564
	Layering of objects
	Meaning	Comment	Class	Number	Percentage
	0 None		0	3	0.0769231
	1 Weak		1	11	0.282051
	2 Medium		2	19	0.487179
	3 Strong		3	6	0.153846
	State of the fuze
	Meaning	Comment	Class	Number	Percentage
	0 Confirmed No Fuze		0	1	0.025641
	1 Assumed No Fuze		1	37	0.948718
	2 Mixed		2	1	0.025641
	3 Fuzed		3	0	0
	Largest object size
	Meaning	Comment	Class	Number	Percentage
	(0.25, 0.50]			1	0.025641
	(0.50, 0.75]			3	0.0769231
	(0.75, 1.00]			7	0.179487
	(1.00, 1.25]			14	0.358974
	(1.25, 1.50]			10	0.25641
	> 1.50			4	0.102564
	Median object size
	Meaning	Comment	Class	Number	Percentage
	(0.25, 0.50]			9	0.230769
	(0.50, 0.75]			10	0.25641
	(0.75, 1.00]			7	0.179487
	(1.00, 1.25]			12	0.307692
	(1.25, 1.50]			1	0.025641
	> 1.50			0	0
	State of corrosion of the casing
	Meaning	Comment	Class	Number	Percentage
	0 None		0	0	0
	1 Very weak	Assumed none/corrosion at the surface	1	6	0.153846
	2 Weak	Holes and cracks visible/deformation due to corrosion	2	24	0.615385
	3 Medium	Large holes/strong corrosion	3	7	0.179487
	4 Strong	Over 50 % gone/almost complete corrosion	4	2	0.0512821
	5 Complete	Complete corrosion/loose explosives	5	0	0
	Burial state
	Meaning	Comment	Class	Number	Percentage
	0 None		0	0	0
	1 Slightly	Scour visible	1	2	0.0512821
	2 Medium		2	31	0.794872
	3 Strongly	Identification not possible	3	6	0.153846
	4 Completely	Only for magnetic data	4	0	0

## Sheet: 7. Spearman correlation
	Correlation Coefficient
		Variability	Layering	Stat of corrosion	Burial state	Largest object	Median object size	Number of objects	Area
	Variability	1
	Layering	0.698437	1
	Stat of corrosion	0.235148	-0.112563	1
	Burial state	0.0161218	-0.168741	0.203118	1
	Largest object	0.0595602	-0.317165	0.344328	0.328515	1
	Median object size	-0.514588	-0.590697	0.240824	0.0856275	0.447994	1
	Number of objects	0.687442	0.887538	-0.17916	-0.139998	-0.173868	-0.602823	1
	Area	0.462889	0.495398	0.0148003	0.116923	-0.0137811	-0.0964	0.66164	1
	t-value
		Variability	Layering	Stat of corrosion	Burial state	Largest object	Median object size	Number of objects	Area
	Variability	#NUM!
	Layering	5.85552	#NUM!
	Stat of corrosion	1.45159	-0.679698	2.84719e+08
	Burial state	0.0967433	-1.02717	1.24465	#NUM!
	Largest object	0.357997	-2.00659	2.20053	2.08692	#NUM!
	Median object size	-3.60088	-4.39238	1.48876	0.515659	3.00655	#DIV/0!
	Number of objects	5.67947	11.5581	-1.09264	-0.848341	-1.05934	-4.53321	#NUM!
	Area	3.13322	3.42178	0.0888116	0.706382	-0.0826943	-0.581107	5.29438	#DIV/0!
	p-value
		Variability	Layering	Stat of corrosion	Burial state	Largest object	Median object size	Number of objects	Area
	Variability	#NUM!
	Layering	1.08401e-06	#NUM!
	Stat of corrosion	0.155275	0.501043	5.95988e-278
	Burial state	0.923467	0.311191	0.221302	#NUM!
	Largest object	0.722436	0.0523495	0.0342695	0.0440375	#NUM!
	Median object size	0.000948601	9.45169e-05	0.14526	0.609245	0.00479414	#DIV/0!
	Number of objects	1.86392e-06	1.13179e-13	0.28181	0.401854	0.296501	6.19503e-05	#NUM!
	Area	0.00342943	0.0015647	0.929724	0.484497	0.934553	0.564789	6.09514e-06	#DIV/0!
