# Supplementary material for: Munition Piles in the German Baltic Sea: Inventory and Maritime Hazard Perspectives
Source: Copernicus journal article supplement (doi:10.5194/essd-2025-795), 2026-02-23
Supplement: Supplementary file 2 [file Supplement 2_Extrapolation of the Number of Objects.xlsx]

## Sheet: 1. Log-log regression
	General information			Log-log regression						Log-log regression (accumulated)
	ID	Number of objects (dataset B)	Area [m²]	Number of objects	Number of objects (upper bound)	Number of objects (lower bound)	Number of objects adjusted	Number of objects adjusted (upper bound)	Number of objects adjusted (lower bound)	Number of objects	Number of objects (upper bound)	Number of objects (lower bound)	Number of objects adjusted	Number of objects adjusted (upper bound)	Number of objects adjusted (lower bound)
	Pzh_00095	0	20.0016	3.95274	11.5145	1.35691	6.46273	18.8262	2.21855	3.95274	11.5145	1.35691	6.46273	18.8262	2.21855
	Pzh_02217	0	20.0387	3.96258	11.5432	1.36029	6.47882	18.8731	2.22407	7.91532	23.0576	2.7172	12.9415	37.6993	4.44262
	Pzh_00988	0	20.1342	3.98794	11.617	1.36899	6.52028	18.9938	2.23831	11.9033	34.6747	4.0862	19.4618	56.6931	6.68093
	Pzh_00987	0	20.166	3.99637	11.6416	1.37189	6.53407	19.034	2.24304	15.8996	46.3163	5.45809	25.9959	75.7271	8.92397
	Pzh_00092	0	20.2905	4.02951	11.7381	1.38326	6.58824	19.1918	2.26164	19.9291	58.0544	6.84135	32.5841	94.9189	11.1856
	Pzh_00701	0	20.3971	4.05794	11.8209	1.39303	6.63473	19.3273	2.2776	23.9871	69.8753	8.23438	39.2189	114.246	13.4632
	Pzh_01068	0	20.4068	4.06054	11.8285	1.39392	6.63898	19.3396	2.27905	28.0476	81.7039	9.62829	45.8579	133.586	15.7423
	Pzh_01054	0	20.4792	4.07988	11.8849	1.40056	6.67061	19.4318	2.28991	32.1275	93.5887	11.0289	52.5285	153.018	18.0322
	Pzh_00328	0	20.5619	4.10201	11.9493	1.40815	6.70678	19.5371	2.30233	36.2295	105.538	12.437	59.2352	172.555	20.3345
	Pzh_00212	0	20.9592	4.2087	12.2601	1.44478	6.88122	20.0453	2.36221	40.4382	117.798	13.8818	66.1165	192.6	22.6967
	Pzh_00359	0	20.9665	4.21066	12.2658	1.44545	6.88443	20.0546	2.36331	44.6489	130.064	15.3272	73.0009	212.655	25.06
	Pzh_00101	0	20.9989	4.21939	12.2912	1.44845	6.89869	20.0962	2.36821	48.8682	142.355	16.7757	79.8996	232.751	27.4282
	Pzh_00314	0	21.026	4.2267	12.3125	1.45096	6.91065	20.131	2.37231	53.0949	154.668	18.2266	86.8102	252.882	29.8006
	Pzh_00391	0	21.1342	4.2559	12.3976	1.46098	6.9584	20.2701	2.38871	57.3508	167.065	19.6876	93.7686	273.152	32.1893
	Pzh_00195	0	21.1882	4.2705	12.4401	1.46599	6.98227	20.3396	2.3969	61.6213	179.506	21.1536	100.751	293.492	34.5862
	Pzh_00003	0	21.2317	4.28227	12.4744	1.47003	7.0015	20.3957	2.4035	65.9036	191.98	22.6236	107.752	313.887	36.9897
	Pzh_02224	0	21.3189	4.30588	12.5432	1.47814	7.04011	20.5081	2.41675	70.2095	204.523	24.1018	114.793	334.395	39.4064
	Pzh_00316	0	21.3214	4.30655	12.5452	1.47837	7.04121	20.5113	2.41713	74.516	217.068	25.5802	121.834	354.907	41.8235
	Pzh_00087	0	21.5659	4.37294	12.7386	1.50116	7.14976	20.8276	2.4544	78.889	229.807	27.0813	128.983	375.734	44.2779
	Pzh_00033	0	21.5797	4.3767	12.7495	1.50245	7.15591	20.8455	2.45651	83.2657	242.556	28.5838	136.139	396.58	46.7345
	Pzh_00047	0	21.5837	4.3778	12.7527	1.50283	7.15771	20.8507	2.45713	87.6435	255.309	30.0866	143.297	417.43	49.1916
	Haf_00002	664	263.416	664	664	664	1085.64	1085.64	1085.64	751.643	919.309	694.087	1228.94	1503.07	1134.83
	Pzh_00382	0	21.6311	4.3907	12.7903	1.50726	7.1788	20.9121	2.46436	756.034	932.099	695.594	1236.12	1523.98	1137.3
	Pzh_00086	0	21.8067	4.43859	12.9298	1.5237	7.2571	21.1402	2.49125	760.473	945.029	697.118	1243.37	1545.12	1139.79
	Haf_00605	0	21.872	152.915	277.908	84.1393	250.016	454.379	137.568	913.388	1222.94	781.257	1493.39	1999.5	1277.35
	Pzh_00075	0	21.8968	4.46321	13.0015	1.53215	7.29735	21.2575	2.50506	917.851	1235.94	782.789	1500.69	2020.76	1279.86
	Pzh_00184	0	22.1114	4.522	13.1728	1.55233	7.39347	21.5375	2.53806	922.373	1249.11	784.341	1508.08	2042.3	1282.4
	Pzh_00079	0	22.4393	4.61219	13.4355	1.58329	7.54092	21.967	2.58868	926.985	1262.55	785.925	1515.62	2064.26	1284.99
	Pzh_01080	0	22.6734	4.67686	13.6239	1.60549	7.64666	22.275	2.62498	931.662	1276.17	787.53	1523.27	2086.54	1287.61
	Pzh_02216	0	23.2796	4.8454	14.1148	1.66335	7.92222	23.0778	2.71957	936.507	1290.29	789.193	1531.19	2109.62	1290.33
	Pzh_00378	0	23.3143	4.85509	14.1431	1.66668	7.93808	23.1239	2.72501	941.362	1304.43	790.86	1539.13	2132.74	1293.06
	Pzh_00194	0	23.3611	4.86816	14.1812	1.67116	7.95945	23.1862	2.73235	946.231	1318.61	792.531	1547.09	2155.93	1295.79
	Haf_00314	178.33	77.251	178.33	178.33	178.33	291.57	291.57	291.57	1124.56	1496.94	970.861	1838.66	2447.5	1587.36
	Pzh_00113	0	23.6905	4.96049	14.4501	1.70286	8.11041	23.6259	2.78417	1129.52	1511.39	972.564	1846.77	2471.12	1590.14
	Pzh_00118	0	23.9346	5.02918	14.6502	1.72644	8.22271	23.9531	2.82272	1134.55	1526.04	974.291	1854.99	2495.08	1592.97
	Pzh_00078	0	24.1431	5.08807	14.8217	1.74665	8.31899	24.2336	2.85577	1139.64	1540.86	976.037	1863.31	2519.31	1595.82
	Pzh_00093	0	24.5506	5.20361	15.1583	1.78631	8.5079	24.7838	2.92062	1144.84	1556.02	977.823	1871.82	2544.09	1598.74
	Pzh_00208	0	24.7221	5.25245	15.3006	1.80308	8.58776	25.0165	2.94804	1150.09	1571.32	979.627	1880.4	2569.11	1601.69
	Pzh_00048	0	24.8489	5.28861	15.4059	1.8155	8.64688	25.1887	2.96834	1155.38	1586.73	981.442	1889.05	2594.3	1604.66
	Pzh_00389	0	25.1786	5.38298	15.6808	1.84789	8.80117	25.6382	3.0213	1160.77	1602.41	983.29	1897.85	2619.94	1607.68
	Pzh_00054	0	25.4255	5.45391	15.8875	1.87224	8.91714	25.976	3.06111	1166.22	1618.29	985.162	1906.77	2645.91	1610.74
	Pzh_00057	0	25.5462	5.48867	15.9887	1.88417	8.97398	26.1416	3.08062	1171.71	1634.28	987.046	1915.74	2672.05	1613.82
	Pzh_00368	0	26.0871	5.64515	16.4446	1.93789	9.22983	26.8869	3.16845	1177.35	1650.73	988.984	1924.97	2698.94	1616.99
	Pzh_00379	0	26.3636	5.72559	16.6789	1.9655	9.36134	27.27	3.2136	1183.08	1667.41	990.95	1934.33	2726.21	1620.2
	Pzh_00056	0	26.4277	5.74428	16.7333	1.97192	9.39191	27.359	3.22409	1188.82	1684.14	992.922	1943.73	2753.57	1623.43
	Pzh_00080	0	26.5512	5.78033	16.8383	1.98429	9.45084	27.5307	3.24432	1194.6	1700.98	994.906	1953.18	2781.1	1626.67
	Pzh_00106	0	27.5869	6.08485	17.7254	2.08883	9.94873	28.981	3.41524	1200.69	1718.7	996.995	1963.13	2810.08	1630.09
	Pzh_00336	0	27.7826	6.14282	17.8943	2.10873	10.0435	29.2572	3.44778	1206.83	1736.6	999.104	1973.17	2839.34	1633.53
	Pzh_00164	0	27.8734	6.16979	17.9728	2.11799	10.0876	29.3856	3.46291	1213	1754.57	1001.22	1983.26	2868.72	1637
	Haf_00329	0	28.105	169.714	308.438	93.3827	277.482	504.297	152.681	1382.72	2063.01	1094.6	2260.74	3373.02	1789.68
	Pzh_00244	0	28.1651	6.25656	18.2256	2.14778	10.2295	29.7989	3.51161	1388.97	2081.24	1096.75	2270.97	3402.82	1793.19
	Pzh_00061	0	28.1721	6.25866	18.2317	2.1485	10.2329	29.8089	3.51279	1395.23	2099.47	1098.9	2281.2	3432.63	1796.7
	Pzh_00173	0	28.2825	6.29157	18.3276	2.15979	10.2867	29.9656	3.53126	1401.52	2117.79	1101.06	2291.49	3462.59	1800.23
	Haf_00603	0	28.425	170.515	309.893	93.8232	278.791	506.676	153.401	1572.04	2427.69	1194.88	2570.28	3969.27	1953.63
	Pzh_00074	0	28.5891	6.38325	18.5947	2.19127	10.4366	30.4023	3.58272	1578.42	2446.28	1197.07	2580.72	3999.67	1957.22
	Pzh_00353	0	28.7073	6.4187	18.6979	2.20344	10.4946	30.5711	3.60262	1584.84	2464.98	1199.28	2591.21	4030.24	1960.82
	Haf_00601	0	28.728	171.268	311.262	94.2377	280.023	508.914	154.079	1756.11	2776.24	1293.52	2871.23	4539.16	2114.9
	Pzh_00358	0	28.9608	6.49484	18.9197	2.22957	10.6191	30.9338	3.64535	1762.6	2795.16	1295.75	2881.85	4570.09	2118.54
	Pzh_00131	0	29.0844	6.53208	19.0282	2.24236	10.68	31.1111	3.66626	1769.13	2814.19	1297.99	2892.53	4601.2	2122.21
	Pzh_00211	0	29.2768	6.59013	19.1973	2.26228	10.7749	31.3876	3.69884	1775.72	2833.39	1300.25	2903.31	4632.59	2125.91
	Pzh_00098	0	29.3042	6.59841	19.2214	2.26513	10.7884	31.427	3.70348	1782.32	2852.61	1302.52	2914.1	4664.02	2129.61
	Pzh_00051	0	29.3866	6.6233	19.294	2.27367	10.8291	31.5456	3.71746	1788.94	2871.9	1304.79	2924.93	4695.56	2133.33
	Pzh_00024	0	29.4196	6.63327	19.323	2.27709	10.8454	31.5931	3.72305	1795.58	2891.23	1307.07	2935.77	4727.16	2137.05
	Pzh_00374	0	30.0864	6.83578	19.9129	2.34661	11.1765	32.5576	3.83671	1802.41	2911.14	1309.41	2946.95	4759.71	2140.89
	Pzh_00384	0	30.3031	6.9019	20.1055	2.36931	11.2846	32.8725	3.87382	1809.32	2931.25	1311.78	2958.23	4792.59	2144.76
	Pzh_00071	0	30.5088	6.96485	20.2889	2.39092	11.3875	33.1723	3.90915	1816.28	2951.53	1314.17	2969.62	4825.76	2148.67
	Pzh_00140	0	30.5964	6.99169	20.3671	2.40013	11.4314	33.3002	3.92422	1823.27	2971.9	1316.57	2981.05	4859.06	2152.6
	Pzh_00335	0	30.8244	7.06169	20.571	2.42416	11.5459	33.6336	3.96351	1830.33	2992.47	1319	2992.6	4892.69	2156.56
	Pzh_00091	0	31.2299	7.1866	20.9349	2.46704	11.7501	34.2285	4.03362	1837.52	3013.41	1321.46	3004.35	4926.92	2160.59
	Pzh_00112	0	31.504	7.27137	21.1818	2.49614	11.8887	34.6322	4.08119	1844.79	3034.59	1323.96	3016.24	4961.55	2164.68
	Pzh_00041	0	31.7344	7.3428	21.3899	2.52066	12.0055	34.9724	4.12129	1852.13	3055.98	1326.48	3028.24	4996.53	2168.8
	Haf_00586	0	31.876	178.833	325.012	98.4004	292.392	531.394	160.885	2030.97	3380.99	1424.88	3320.63	5527.92	2329.68
	Pzh_01776	0	32.1375	7.46821	21.7552	2.56372	12.2105	35.5697	4.19167	2038.44	3402.75	1427.45	3332.84	5563.49	2333.87
	Pzh_00020	0	32.2059	7.48954	21.8173	2.57104	12.2454	35.6713	4.20365	2045.93	3424.56	1430.02	3345.09	5599.16	2338.08
	Pzh_00063	0	32.4173	7.55558	22.0097	2.59371	12.3534	35.9859	4.24072	2053.48	3446.57	1432.61	3357.44	5635.15	2342.32
	Pzh_00385	0	32.6819	7.63844	22.2511	2.62215	12.4888	36.3805	4.28722	2061.12	3468.82	1435.23	3369.93	5671.53	2346.6
	Pzh_00053	0	32.6883	7.64045	22.257	2.62284	12.4921	36.3901	4.28835	2068.76	3491.08	1437.85	3382.42	5707.92	2350.89
	Pzh_00021	0	32.7517	7.66032	22.3148	2.62967	12.5246	36.4848	4.2995	2076.42	3513.4	1440.48	3394.95	5744.4	2355.19
	Pzh_00111	0	32.8311	7.68527	22.3875	2.63823	12.5654	36.6036	4.31351	2084.11	3535.78	1443.12	3407.51	5781.01	2359.51
	Pzh_00067	0	32.9186	7.71276	22.4676	2.64767	12.6104	36.7345	4.32894	2091.82	3558.25	1445.77	3420.12	5817.74	2363.83
	Pzh_00038	0	32.9384	7.71899	22.4857	2.6498	12.6205	36.7642	4.33243	2099.54	3580.74	1448.42	3432.74	5854.5	2368.17
	Pzh_00039	0	32.9664	7.72779	22.5114	2.65283	12.6349	36.8061	4.33737	2107.27	3603.25	1451.07	3445.38	5891.31	2372.5
	Haf_00315	383.67	129.162	383.67	383.67	383.67	627.3	627.3	627.3	2490.94	3986.92	1834.74	4072.68	6518.61	2999.8
	Haf_00316	165.33	47.404	165.33	165.33	165.33	270.315	270.315	270.315	2656.27	4152.25	2000.07	4342.99	6788.93	3270.12
	Haf_00588	0	33.959	183.601	333.678	101.024	300.188	545.563	165.174	2839.87	4485.93	2101.1	4643.18	7334.49	3435.29
	Pzh_00001	0	34.3323	8.16038	23.7715	2.80133	13.3422	38.8665	4.58017	2848.03	4509.7	2103.9	4656.52	7373.35	3439.87
	Pzh_00209	0	34.5581	8.23249	23.9816	2.82608	13.4601	39.2099	4.62064	2856.26	4533.68	2106.72	4669.98	7412.56	3444.49
	Pzh_00215	0	34.5608	8.23333	23.984	2.82637	13.4615	39.2139	4.62111	2864.49	4557.66	2109.55	4683.45	7451.78	3449.12
	Pzh_00174	0	34.7222	8.28498	24.1345	2.8441	13.5459	39.4599	4.65011	2872.78	4581.8	2112.39	4696.99	7491.24	3453.77
	Pzh_00030	0	35.0389	8.38652	24.4303	2.87896	13.712	39.9435	4.7071	2881.16	4606.23	2115.27	4710.7	7531.18	3458.47
	Pzh_00148	0	35.575	8.55912	24.9331	2.93821	13.9942	40.7656	4.80397	2889.72	4631.16	2118.21	4724.7	7571.95	3463.28
	Pzh_00383	0	35.7614	8.61936	25.1085	2.95889	14.0926	41.0525	4.83778	2898.34	4656.27	2121.17	4738.79	7613	3468.11
	Haf_00598	0	36.256	188.665	342.881	103.81	308.468	560.61	169.73	3087.01	4999.15	2224.98	5047.26	8173.61	3637.84
	Pzh_00331	0	36.3071	8.79628	25.6239	3.01962	14.3819	41.8951	4.93708	3095.8	5024.77	2228	5061.64	8215.5	3642.78
	Pzh_02271	0	36.4421	8.8402	25.7519	3.0347	14.4537	42.1043	4.96173	3104.64	5050.53	2231.04	5076.09	8257.61	3647.74
	Pzh_00356	0	36.5607	8.87881	25.8643	3.04795	14.5169	42.2882	4.9834	3113.52	5076.39	2234.08	5090.61	8299.9	3652.73
	Pzh_00210	0	36.6374	8.90381	25.9372	3.05654	14.5577	42.4073	4.99744	3122.43	5102.33	2237.14	5105.17	8342.3	3657.72
	Haf_00592	0	36.943	190.143	345.567	104.624	310.884	565.002	171.06	3312.57	5447.89	2341.76	5416.05	8907.31	3828.78
	Pzh_02244	0	37.0034	9.02335	26.2854	3.09757	14.7532	42.9766	5.06453	3321.59	5474.18	2344.86	5430.81	8950.28	3833.85
	Pzh_00088	0	37.0786	9.04796	26.3571	3.10602	14.7934	43.0938	5.07834	3330.64	5500.54	2347.97	5445.6	8993.38	3838.93
	Pzh_00330	0	37.142	9.06874	26.4176	3.11315	14.8274	43.1928	5.09	3339.71	5526.95	2351.08	5460.43	9036.57	3844.02
	Haf_00594	0	37.159	190.605	346.405	104.878	311.639	566.373	171.475	3530.32	5873.36	2455.96	5772.07	9602.94	4015.49
	Pzh_00363	0	37.3901	9.1501	26.6546	3.14108	14.9604	43.5803	5.13567	3539.47	5900.01	2459.1	5787.03	9646.52	4020.63
	Pzh_00213	0	37.5946	9.21732	26.8504	3.16416	15.0703	43.9005	5.1734	3548.68	5926.86	2462.26	5802.1	9690.42	4025.8
	Pzh_00114	0	37.7877	9.28089	27.0356	3.18598	15.1742	44.2032	5.20907	3557.96	5953.9	2465.45	5817.27	9734.63	4031.01
	Haf_00602	0	37.941	192.262	349.417	105.789	314.348	571.298	172.966	3750.23	6303.32	2571.24	6131.62	10305.9	4203.98
	Pzh_00006	0	37.976	9.34299	27.2165	3.2073	15.2758	44.499	5.24393	3759.57	6330.53	2574.45	6146.9	10350.4	4209.22
	Haf_00593	0	38.014	192.416	349.697	105.874	314.6	571.754	173.104	3951.98	6680.23	2680.32	6461.49	10922.2	4382.32
	Pzh_00141	0	38.1346	9.39539	27.3692	3.22529	15.3615	44.7486	5.27334	3961.38	6707.6	2683.55	6476.86	10966.9	4387.6
	Haf_00580	0	38.411	193.249	351.21	106.332	315.961	574.229	173.853	4154.63	7058.81	2789.88	6792.82	11541.2	4561.45
	Haf_00327	0	38.696	193.843	352.291	106.66	316.934	575.996	174.388	4348.47	7411.1	2896.54	7109.75	12117.2	4735.84
	Haf_00584	0	38.832	194.126	352.805	106.815	317.396	576.837	174.643	4542.6	7763.91	3003.35	7427.15	12694	4910.48
	Haf_00600	0	39.31	195.116	354.604	107.36	319.015	579.778	175.533	4737.71	8118.51	3110.71	7746.16	13273.8	5086.02
	Haf_00595	0	39.334	195.166	354.694	107.387	319.096	579.925	175.578	4932.88	8473.21	3218.1	8065.26	13853.7	5261.59
	Pzh_00235	0	39.5163	9.85493	28.7078	3.38304	16.1128	46.9373	5.53127	4942.73	8501.91	3221.48	8081.37	13900.6	5267.12
	Pzh_00313	0	39.6426	9.89719	28.8309	3.39755	16.1819	47.1386	5.55499	4952.63	8530.74	3224.88	8097.55	13947.8	5272.68
	Haf_00583	0	39.843	196.211	356.595	107.963	320.806	583.033	176.519	5148.84	8887.34	3332.84	8418.36	14530.8	5449.2
	Haf_00585	0	40.079	196.694	357.472	108.228	321.594	584.466	176.953	5345.54	9244.81	3441.07	8739.95	15115.3	5626.15
	Haf_00590	0	40.423	197.394	358.744	108.613	322.739	586.546	177.583	5542.93	9603.56	3549.68	9062.69	15701.8	5803.73
	Pzh_00216	0	40.8323	10.2977	29.9977	3.53505	16.8368	49.0463	5.7798	5553.23	9633.55	3553.22	9079.53	15750.9	5809.51
	Pzh_00097	0	41.0741	10.3796	30.2363	3.56316	16.9707	49.4364	5.82577	5563.61	9663.79	3556.78	9096.5	15800.3	5815.34
	Haf_00599	0	41.199	198.96	361.591	109.475	325.3	591.201	178.992	5762.57	10025.4	3666.26	9421.8	16391.5	5994.33
	Haf_00589	0	41.296	199.155	361.945	109.582	325.618	591.779	179.167	5961.72	10387.3	3775.84	9747.42	16983.3	6173.5
	Pzh_00259	0	41.5416	10.5385	30.699	3.61768	17.2304	50.1928	5.91491	5972.26	10418	3779.46	9764.65	17033.5	6179.41
	Haf_00597	0	41.639	199.841	363.191	109.96	326.74	593.818	179.784	6172.1	10781.2	3889.42	10091.4	17627.3	6359.2
	Pzh_00333	0	41.7751	10.618	30.9307	3.64499	17.3604	50.5717	5.95956	6182.72	10812.1	3893.06	10108.7	17677.9	6365.16
	Pzh_00116	0	41.8107	10.6302	30.9661	3.64916	17.3803	50.6296	5.96638	6193.35	10843.1	3896.71	10126.1	17728.5	6371.12
	Haf_00591	0	42.679	201.901	366.935	111.093	330.108	599.939	181.637	6395.25	11210	4007.8	10456.2	18328.4	6552.76
	Pzh_00025	0	42.8506	10.9864	32.0038	3.77145	17.9628	52.3263	6.16633	6406.24	11242.1	4011.58	10474.2	18380.8	6558.93
	Pzh_00355	0	43.0886	11.0683	32.2425	3.79958	18.0967	52.7165	6.21231	6417.31	11274.3	4015.38	10492.3	18433.5	6565.14
	Haf_00582	0	43.488	203.483	369.811	111.964	332.695	604.64	183.061	6620.79	11644.1	4127.34	10825	19038.1	6748.2
	Haf_00587	0	43.556	203.615	370.051	112.036	332.911	605.033	183.18	6824.4	12014.2	4239.38	11157.9	19643.1	6931.38
	Pzh_00388	0	43.5927	11.2424	32.7496	3.85934	18.3813	53.5456	6.31002	6835.65	12046.9	4243.23	11176.3	19696.7	6937.69
	Pzh_00015	0	44.3883	11.5186	33.5541	3.95414	18.8329	54.8609	6.46502	6847.17	12080.5	4247.19	11195.1	19751.5	6944.15
	Pzh_00136	0	44.6797	11.6201	33.8499	3.989	18.9989	55.3446	6.52202	6858.79	12114.3	4251.18	11214.1	19806.9	6950.68
	Pzh_00036	0	45.4736	11.898	34.6593	4.08439	19.4532	56.668	6.67797	6870.68	12149	4255.26	11233.6	19863.6	6957.35
	Pzh_00145	0	46.0593	12.1041	35.2596	4.15513	19.7902	57.6495	6.79364	6882.79	12184.2	4259.42	11253.4	19921.2	6964.15
	Pzh_00276	0	46.0732	12.109	35.2739	4.15681	19.7981	57.6728	6.79638	6894.9	12219.5	4263.57	11273.2	19978.9	6970.94
	Pzh_00236	0	47.2228	12.5161	36.4598	4.29656	20.4638	59.6118	7.02488	6907.41	12256	4267.87	11293.6	20038.5	6977.97
	Pzh_00156	0	47.3374	12.5568	36.5786	4.31056	20.5304	59.806	7.04777	6919.97	12292.5	4272.18	11314.2	20098.3	6985.02
	Haf_00318	432	181.056	432	432	432	706.32	706.32	706.32	7351.97	12724.5	4704.18	12020.5	20804.6	7691.34
	Pzh_00076	0	47.5191	12.6215	36.7671	4.33277	20.6362	60.1142	7.08409	7364.59	12761.3	4708.51	12041.1	20864.7	7698.42
	Pzh_00128	0	47.7485	12.7034	37.0055	4.36086	20.77	60.5039	7.13001	7377.29	12798.3	4712.87	12061.9	20925.2	7705.55
	Pzh_00362	0	48.6736	13.0347	37.9705	4.47459	21.3117	62.0818	7.31596	7390.33	12836.3	4717.35	12083.2	20987.3	7712.87
	Pzh_00045	0	48.6843	13.0385	37.9817	4.47591	21.3179	62.1001	7.31811	7403.37	12874.3	4721.83	12104.5	21049.4	7720.18
	Pzh_00172	0	49.0072	13.1547	38.3201	4.51578	21.5079	62.6533	7.3833	7416.52	12912.6	4726.34	12126	21112.1	7727.57
	Pzh_00150	0	49.0177	13.1584	38.3311	4.51708	21.5141	62.6714	7.38543	7429.68	12950.9	4730.86	12147.5	21174.7	7734.95
	Pzh_00288	0	49.1072	13.1907	38.4251	4.52816	21.5668	62.825	7.40354	7442.87	12989.3	4735.39	12169.1	21237.6	7742.36
	Pzh_02243	0	49.2346	13.2366	38.5589	4.54392	21.6419	63.0437	7.42932	7456.11	13027.9	4739.93	12190.7	21300.6	7749.79
	Haf_00581	0	50.212	216.015	392.586	118.859	353.184	641.878	194.335	7672.12	13420.5	4858.79	12543.9	21942.5	7944.12
	Pzh_00017	0	51.4528	14.0429	40.9075	4.82069	22.9601	66.8837	7.88183	7686.17	13461.4	4863.61	12566.9	22009.4	7952
	Pzh_00339	0	51.8001	14.1702	41.2784	4.8644	23.1683	67.4901	7.95329	7700.34	13502.7	4868.47	12590	22076.9	7959.96
	Pzh_00332	0	52.2037	14.3185	41.7104	4.91532	23.4108	68.1966	8.03654	7714.65	13544.4	4873.39	12613.5	22145.1	7967.99
	Pzh_00183	0	52.851	14.5572	42.4059	4.99727	23.8011	69.3336	8.17053	7729.21	13586.8	4878.39	12637.3	22214.4	7976.16
	Haf_00312	0	53.009	220.938	401.533	121.568	361.233	656.506	198.764	7950.15	13988.3	4999.96	12998.5	22870.9	8174.93
	Pzh_00026	0	53.295	14.7215	42.8845	5.05367	24.0697	70.1161	8.26275	7964.87	14031.2	5005.01	13022.6	22941	8183.19
	Pzh_00132	0	54.7096	15.2482	44.4186	5.23446	24.9308	72.6244	8.55834	7980.12	14075.6	5010.24	13047.5	23013.6	8191.75
	Pzh_00029	0	54.7704	15.2709	44.4849	5.24227	24.968	72.7328	8.57111	7995.39	14120.1	5015.49	13072.5	23086.4	8200.32
	Pzh_00059	0	55.2662	15.4567	45.0259	5.30603	25.2717	73.6174	8.67535	8010.85	14165.1	5020.79	13097.7	23160	8208.99
	Pzh_00271	0	56.4724	15.911	46.3493	5.46198	26.0145	75.7812	8.93034	8026.76	14211.5	5026.25	13123.7	23235.8	8217.92
	Pzh_00387	0	56.5233	15.9302	46.4054	5.46859	26.0459	75.8728	8.94114	8042.69	14257.9	5031.72	13149.8	23311.6	8226.87
	Pzh_00293	0	56.5927	15.9565	46.4819	5.47761	26.0889	75.9979	8.95589	8058.64	14304.4	5037.2	13175.9	23387.6	8235.82
	Pzh_00049	0	57.4504	16.2818	47.4295	5.58928	26.6207	77.5473	9.13847	8074.93	14351.8	5042.79	13202.5	23465.2	8244.96
	Pzh_00364	0	57.8983	16.4523	47.9263	5.64782	26.8995	78.3595	9.23418	8091.38	14399.7	5048.44	13229.4	23543.6	8254.19
	Pzh_00027	0	57.9812	16.4839	48.0184	5.65867	26.9512	78.5101	9.25193	8107.86	14447.7	5054.1	13256.4	23622.1	8263.45
	Pzh_00143	0	59.5936	17.1019	49.8184	5.87079	27.9615	81.4531	9.59875	8124.96	14497.6	5059.97	13284.3	23703.5	8273.04
	Pzh_00161	0	60.0494	17.2776	50.3304	5.93113	28.2489	82.2902	9.69739	8142.24	14547.9	5065.9	13312.6	23785.8	8282.74
	Pzh_00350	0	60.3227	17.3832	50.6379	5.96736	28.4215	82.7929	9.75664	8159.63	14598.5	5071.86	13341	23868.6	8292.5
	Pzh_00390	0	61.2107	17.7274	51.6406	6.08552	28.9843	84.4323	9.94983	8177.35	14650.2	5077.95	13370	23953	8302.45
	Pzh_00162	0	61.4711	17.8286	51.9356	6.12028	29.1498	84.9146	10.0067	8195.18	14702.1	5084.07	13399.1	24037.9	8312.46
	Pzh_00264	0	61.8406	17.9726	52.3548	6.16969	29.3851	85.6001	10.0874	8213.15	14754.5	5090.24	13428.5	24123.5	8322.54
	Pzh_00369	0	62.0287	18.046	52.5686	6.19489	29.5051	85.9497	10.1286	8231.2	14807	5096.44	13458	24209.5	8332.67
	Pzh_00104	0	62.2607	18.1366	52.8326	6.226	29.6533	86.3814	10.1795	8249.34	14859.9	5102.66	13487.7	24295.9	8342.85
	Pzh_00360	0	62.267	18.139	52.8397	6.22684	29.6573	86.393	10.1809	8267.48	14912.7	5108.89	13517.3	24382.3	8353.03
	Pzh_00096	0	62.4113	18.1955	53.0042	6.24621	29.7496	86.6618	10.2126	8285.67	14965.7	5115.13	13547.1	24468.9	8363.24
	Pzh_00099	0	62.4357	18.205	53.032	6.24949	29.7652	86.7073	10.2179	8303.88	15018.7	5121.38	13576.8	24555.6	8373.46
	Haf_00319	498.67	440.17	498.67	498.67	498.67	815.325	815.325	815.325	8802.55	15517.4	5620.05	14392.2	25371	9188.79
	Pzh_00014	0	64.2803	18.9303	55.1447	6.49846	30.951	90.1615	10.625	8821.48	15572.6	5626.55	14423.1	25461.1	9199.41
	Pzh_00386	0	64.3982	18.9769	55.2804	6.51445	31.0272	90.3834	10.6511	8840.45	15627.8	5633.07	14454.1	25551.5	9210.06
	Pzh_02273	0	65.0908	19.2512	56.0796	6.60863	31.4757	91.6901	10.8051	8859.7	15683.9	5639.68	14485.6	25643.2	9220.87
	Pzh_00100	0	65.625	19.4635	56.6979	6.6815	31.8228	92.7011	10.9243	8879.17	15740.6	5646.36	14517.4	25735.9	9231.79
	Pzh_00016	0	65.9277	19.584	57.0491	6.72288	32.0199	93.2752	10.9919	8898.75	15797.7	5653.08	14549.5	25829.2	9242.79
	Pzh_00007	0	66.0585	19.6362	57.2009	6.74077	32.1051	93.5235	11.0212	8918.39	15854.9	5659.82	14581.6	25922.7	9253.81
	Pzh_00327	0	66.6035	19.8538	57.835	6.8155	32.461	94.5603	11.1433	8938.24	15912.7	5666.64	14614	26017.3	9264.95
	Pzh_00361	0	66.7489	19.912	58.0045	6.83547	32.5561	94.8374	11.176	8958.15	15970.7	5673.47	14646.6	26112.1	9276.13
	Pzh_00329	0	66.8845	19.9663	58.1627	6.85411	32.6449	95.096	11.2065	8978.12	16028.9	5680.33	14679.2	26207.2	9287.33
	Pzh_00337	0	67.8479	20.3531	59.2895	6.9869	33.2774	96.9383	11.4236	8998.47	16088.2	5687.31	14712.5	26304.1	9298.76
	Pzh_00260	0	67.8786	20.3655	59.3255	6.99114	33.2976	96.9971	11.4305	9018.84	16147.5	5694.3	14745.8	26401.1	9310.19
	Pzh_00013	0	68.4962	20.6145	60.0508	7.07661	33.7047	98.183	11.5703	9039.45	16207.5	5701.38	14779.5	26499.3	9321.76
	Pzh_00084	0	69.7506	21.1226	61.5309	7.25103	34.5354	100.603	11.8554	9060.58	16269.1	5708.63	14814	26599.9	9333.61
	Pzh_00338	0	69.893	21.1804	61.6994	7.2709	34.63	100.879	11.8879	9081.76	16330.8	5715.9	14848.7	26700.8	9345.5
	Haf_00320	443.67	289.721	443.67	443.67	443.67	725.4	725.4	725.4	9525.43	16774.4	6159.57	15574.1	27426.2	10070.9
	Pzh_02261	0	71.3475	21.7739	63.4283	7.47464	35.6004	103.705	12.221	9547.2	16837.9	6167.05	15609.7	27529.9	10083.1
	Pzh_00147	0	71.4652	21.8221	63.5688	7.49119	35.6792	103.935	12.2481	9569.02	16901.4	6174.54	15645.4	27633.8	10095.4
	Pzh_00286	0	71.5873	21.8722	63.7145	7.50836	35.761	104.173	12.2762	9590.89	16965.1	6182.05	15681.1	27738	10107.6
	Pzh_00257	0	71.817	21.9664	63.989	7.54071	35.9151	104.622	12.3291	9612.86	17029.1	6189.59	15717	27842.6	10120
	Pzh_00144	0	71.906	22.0029	64.0954	7.55325	35.9748	104.796	12.3496	9634.86	17093.2	6197.14	15753	27947.4	10132.3
	Pzh_02242	0	71.9311	22.0132	64.1254	7.55679	35.9916	104.845	12.3553	9656.88	17157.4	6204.7	15789	28052.3	10144.7
	Pzh_00357	0	71.9937	22.0389	64.2002	7.5656	36.0336	104.967	12.3698	9678.92	17221.6	6212.26	15825	28157.2	10157
	Pzh_00005	0	72.2423	22.1411	64.4979	7.60068	36.2007	105.454	12.4271	9701.06	17286	6219.86	15861.2	28262.7	10169.5
	Pzh_00189	0	72.6488	22.3084	64.9853	7.65812	36.4743	106.251	12.521	9723.37	17351	6227.52	15897.7	28368.9	10182
	Pzh_00318	0	72.8776	22.4027	65.26	7.69049	36.6284	106.7	12.5739	9745.77	17416.3	6235.21	15934.3	28475.6	10194.6
	Haf_00323	552.67	1259.02	552.67	552.67	552.67	903.615	903.615	903.615	10298.4	17969	6787.88	16837.9	29379.3	11098.2
	Pzh_00125	0	74.7365	23.1727	67.5031	7.95482	37.8874	110.368	13.0061	10321.6	18036.5	6795.84	16875.8	29489.6	11111.2
	Pzh_00283	0	75.4386	23.4653	68.3553	8.05525	38.3657	111.761	13.1703	10345.1	18104.8	6803.89	16914.2	29601.4	11124.4
	Pzh_00249	0	76.4113	23.8721	69.5404	8.19491	39.0309	113.699	13.3987	10368.9	18174.4	6812.09	16953.2	29715.1	11137.8
	Pzh_00342	0	76.728	24.0049	69.9274	8.24051	39.2481	114.331	13.4732	10393	18244.3	6820.33	16992.5	29829.4	11151.2
	Pzh_01082	0	76.9048	24.0792	70.1437	8.266	39.3695	114.685	13.5149	10417	18314.4	6828.59	17031.8	29944.1	11164.8
	Haf_00324	592.33	293.607	592.33	592.33	592.33	968.46	968.46	968.46	11009.4	18906.8	7420.92	18000.3	30912.6	12133.2
	Pzh_00062	0	77.2859	24.2394	70.6105	8.32101	39.6315	115.448	13.6049	11033.6	18977.4	7429.24	18039.9	31028	12146.8
	Pzh_00248	0	77.5882	24.3667	70.9813	8.3647	39.8396	116.054	13.6763	11058	19048.4	7437.61	18079.8	31144.1	12160.5
	Pzh_00177	0	77.6772	24.4042	71.0906	8.37758	39.9009	116.233	13.6973	11082.4	19119.4	7445.99	18119.7	31260.3	12174.2
	Pzh_00069	0	78.4718	24.7398	72.0679	8.49276	40.4495	117.831	13.8857	11107.1	19191.5	7454.48	18160.1	31378.1	12188.1
	Pzh_00233	0	78.475	24.7411	72.0719	8.49322	40.4517	117.838	13.8864	11131.9	19263.6	7462.97	18200.6	31496	12202
	Pzh_00031	0	79.3744	25.1223	73.1824	8.62409	41.075	119.653	14.1004	11157	19336.8	7471.6	18241.7	31615.6	12216.1
	Pzh_00168	0	79.441	25.1506	73.2647	8.63379	41.1212	119.788	14.1163	11182.1	19410	7480.23	18282.8	31735.4	12230.2
	Pzh_00303	0	79.9078	25.3491	73.8429	8.70193	41.4457	120.733	14.2277	11207.5	19483.9	7488.93	18324.2	31856.1	12244.4
	Pzh_00354	0	80.2556	25.4972	74.2744	8.75278	41.6879	121.439	14.3108	11233	19558.2	7497.69	18365.9	31977.6	12258.7
	Pzh_00343	0	82.4185	26.4234	76.9725	9.07073	43.2023	125.85	14.8306	11259.4	19635.1	7506.76	18409.1	32103.4	12273.5
	Haf_00332	258.33	70.169	258.33	258.33	258.33	422.37	422.37	422.37	11517.7	19893.5	7765.09	18831.5	32525.8	12695.9
	Pzh_00395	0	85.6895	27.8399	81.0987	9.55698	45.5182	132.596	15.6257	11545.6	19974.6	7774.64	18877	32658.4	12711.5
	Pzh_00119	0	86.1425	28.0375	81.6744	9.62482	45.8413	133.538	15.7366	11573.6	20056.2	7784.27	18922.8	32791.9	12727.3
	Pzh_00258	0	86.1952	28.0605	81.7414	9.63272	45.8789	133.647	15.7495	11601.7	20138	7793.9	18968.7	32925.6	12743
	Pzh_00151	0	87.6518	28.6986	83.6002	9.85177	46.9222	136.686	16.1076	11630.4	20221.6	7803.75	19015.6	33062.3	12759.1
	Pzh_00371	0	89.2875	29.4194	85.7	10.0992	48.1007	140.119	16.5122	11659.8	20307.3	7813.85	19063.7	33202.4	12775.6
	Pzh_00072	0	89.592	29.5541	86.0924	10.1455	48.321	140.761	16.5878	11689.3	20393.4	7824	19112.1	33343.1	12792.2
	Pzh_00070	0	89.7636	29.6301	86.3137	10.1715	48.4452	141.123	16.6305	11719	20479.7	7834.17	19160.5	33484.3	12808.9
	Pzh_00315	0	89.8803	29.6818	86.4642	10.1893	48.5297	141.369	16.6595	11748.6	20566.1	7844.36	19209	33625.6	12825.5
	Pzh_00255	0	90.0784	29.7696	86.7201	10.2194	48.6733	141.787	16.7088	11778.4	20652.9	7854.58	19257.7	33767.4	12842.2
	Pzh_00064	0	91.0661	30.2084	87.9983	10.37	49.3907	143.877	16.955	11808.6	20740.9	7864.95	19307.1	33911.3	12859.2
	Pzh_00103	0	91.3362	30.3286	88.3485	10.4113	49.5873	144.45	17.0225	11839	20829.2	7875.36	19356.7	34055.8	12876.2
	Pzh_02264	0	92.7869	30.9767	90.2364	10.6338	50.6469	147.537	17.3863	11869.9	20919.4	7885.99	19407.3	34203.3	12893.6
	Haf_00331	0	93.239	279.396	507.774	153.734	456.812	830.211	251.354	12149.3	21427.2	8039.73	19864.2	35033.5	13145
	Pzh_00256	0	93.2638	31.1905	90.8593	10.7072	50.9965	148.555	17.5063	12180.5	21518.1	8050.43	19915.1	35182.1	13162.5
	Haf_00326	0	93.916	280.237	509.304	154.197	458.188	832.712	252.111	12460.8	22027.4	8204.63	20373.3	36014.8	13414.6
	Pzh_00165	0	94.6756	31.8256	92.7093	10.9252	52.0349	151.58	17.8627	12492.6	22120.1	8215.55	20425.4	36166.3	13432.4
	Pzh_00002	40.83	112.573	40.83	40.83	40.83	66.757	66.757	66.757	12533.4	22160.9	8256.38	20492.1	36233.1	13499.2
	Pzh_00237	0	96.4709	32.6379	95.0756	11.2041	53.363	155.449	18.3187	12566	22256	8267.59	20545.5	36388.6	13517.5
	Pzh_00167	0	97.2422	32.9885	96.097	11.3244	53.9363	157.119	18.5154	12599	22352.1	8278.91	20599.4	36545.7	13536
	Pzh_02223	0	98.1649	33.4092	97.3224	11.4688	54.624	159.122	18.7516	12632.4	22449.4	8290.38	20654.1	36704.8	13554.8
	Pzh_00117	0	98.3901	33.5121	97.622	11.5041	54.7922	159.612	18.8093	12666	22547	8301.89	20708.8	36864.4	13573.6
	Pzh_00073	0	98.9069	33.7484	98.3106	11.5853	55.1787	160.738	18.942	12699.7	22645.3	8313.47	20764	37025.1	13592.5
	Pzh_00291	0	99.1689	33.8685	98.6602	11.6265	55.3749	161.309	19.0093	12733.6	22744	8325.1	20819.4	37186.5	13611.5
	Pzh_00320	0	100.14	34.3141	99.9585	11.7795	56.1036	163.432	19.2595	12767.9	22844	8336.88	20875.5	37349.9	13630.8
	Pzh_00272	0	100.674	34.5598	100.674	11.8638	56.5053	164.602	19.3974	12802.4	22944.6	8348.74	20932	37514.5	13650.2
	Pzh_00262	0	100.772	34.6048	100.805	11.8793	56.5789	164.817	19.4226	12837.1	23045.4	8360.62	20988.6	37679.3	13669.6
	Haf_00342	0	100.911	288.732	524.743	158.871	472.077	857.954	259.754	13125.8	23570.2	8519.49	21460.7	38537.3	13929.4
	Pzh_00341	0	101.479	34.9312	101.756	11.9913	57.1125	166.371	19.6058	13160.7	23671.9	8531.48	21517.8	38703.6	13949
	Pzh_00295	0	102.245	35.2855	102.788	12.113	57.6918	168.059	19.8047	13196	23774.7	8543.6	21575.5	38871.7	13968.8
	Pzh_00247	0	102.327	35.3234	102.898	12.1259	57.7537	168.239	19.8259	13231.3	23877.6	8555.72	21633.2	39039.9	13988.6
	Pzh_00009	114	125.467	114	114	114	186.39	186.39	186.39	13345.3	23991.6	8669.72	21819.6	39226.3	14175
	Haf_00328	0	103.623	291.933	530.56	160.632	477.31	867.465	262.633	13637.3	24522.2	8830.35	22296.9	40093.8	14437.6
	Pzh_00137	0	104.109	36.1509	105.309	12.41	59.1068	172.181	20.2904	13673.4	24627.5	8842.76	22356	40266	14457.9
	Pzh_00373	0	104.877	36.5093	106.353	12.533	59.6926	173.887	20.4915	13709.9	24733.9	8855.3	22415.7	40439.8	14478.4
	Pzh_00351	0	105.021	36.5769	106.55	12.5562	59.8032	174.209	20.5295	13746.5	24840.4	8867.85	22475.5	40614.1	14498.9
	Pzh_02272	0	105.454	36.7791	107.139	12.6257	60.1339	175.172	20.643	13783.3	24947.5	8880.48	22535.7	40789.2	14519.6
	Pzh_00153	0	105.734	36.9102	107.521	12.6707	60.3482	175.797	20.7166	13820.2	25055.1	8893.15	22596	40965	14540.3
	Pzh_00243	0	106.027	37.0477	107.922	12.7179	60.5731	176.452	20.7938	13857.2	25163	8905.87	22656.6	41141.5	14561.1
	Pzh_00265	0	107.371	37.6792	109.761	12.9346	61.6054	179.459	21.1482	13894.9	25272.7	8918.8	22718.2	41320.9	14582.2
	Pzh_00077	0	112.077	39.9112	116.263	13.7009	65.2547	190.09	22.4009	13934.8	25389	8932.5	22783.4	41511	14604.6
	Pzh_00012	355.67	200.677	355.67	355.67	355.67	581.52	581.52	581.52	14290.5	25744.7	9288.17	23365	42092.5	15186.2
	Pzh_00275	0	113.049	40.3762	117.617	13.8605	66.015	192.305	22.6619	14330.9	25862.3	9302.03	23431	42284.9	15208.8
	Pzh_02237	0	114.741	41.1891	119.986	14.1396	67.3442	196.176	23.1182	14372.1	25982.3	9316.17	23498.3	42481	15231.9
	Pzh_00205	0	116.69	42.1307	122.729	14.4628	68.8838	200.661	23.6467	14414.2	26105	9330.64	23567.2	42681.7	15255.6
	Pzh_00230	0	119.427	43.4615	126.605	14.9196	71.0596	206.999	24.3936	14457.7	26231.6	9345.56	23638.3	42888.7	15280
	Pzh_00281	0	119.578	43.5356	126.821	14.9451	71.1807	207.352	24.4352	14501.2	26358.4	9360.5	23709.4	43096	15304.4
	Pzh_00019	0	121.35	44.4035	129.349	15.243	72.5997	211.486	24.9223	14545.6	26487.8	9375.74	23782	43307.5	15329.3
	Pzh_00198	0	122.959	45.1949	131.655	15.5147	73.8937	215.255	25.3665	14590.8	26619.4	9391.26	23855.9	43522.8	15354.7
	Haf_00336	0	123.879	314.425	571.437	173.008	514.085	934.299	282.868	14905.2	27190.9	9564.27	24370	44457.1	15637.6
	Haf_00335	0	123.93	314.479	571.535	173.038	514.173	934.459	282.916	15219.7	27762.4	9737.3	24884.2	45391.5	15920.5
	Pzh_00349	0	123.932	45.6754	133.054	15.6796	74.6792	217.544	25.6362	15265.4	27895.5	9752.98	24958.9	45609.1	15946.1
	Pzh_00394	0	124.085	45.7511	133.275	15.7056	74.8031	217.904	25.6787	15311.1	28028.7	9768.69	25033.7	45827	15971.8
	Pzh_00376	0	125	46.2041	134.594	15.8611	75.5437	220.062	25.9329	15357.3	28163.3	9784.55	25109.2	46047.1	15997.7
	Pzh_00032	230.33	316.551	230.33	230.33	230.33	376.59	376.59	376.59	15587.7	28393.7	10014.9	25485.8	46423.6	16374.3
	Pzh_00035	488	338.583	488	488	488	797.88	797.88	797.88	16075.7	28881.7	10502.9	26283.7	47221.5	17172.2
	Pzh_00352	0	128.09	47.7434	139.078	16.3895	78.0604	227.393	26.7969	16123.4	29020.7	10519.3	26361.7	47448.9	17199
	Pzh_00037	202	354.412	202	202	202	330.27	330.27	330.27	16325.4	29222.7	10721.3	26692	47779.2	17529.3
	Pzh_00175	0	129.748	48.5741	141.498	16.6747	79.4186	231.35	27.2631	16374	29364.2	10737.9	26771.4	48010.5	17556.5
	Haf_00330	0	130.094	320.889	583.184	176.565	524.653	953.506	288.683	16694.9	29947.4	10914.5	27296.1	48964	17845.2
	Pzh_00166	0	130.509	48.9567	142.613	16.8061	80.0443	233.172	27.4779	16743.8	30090	10931.3	27376.1	49197.2	17872.7
	Pzh_02235	0	130.88	49.1437	143.158	16.8702	80.3499	234.063	27.5828	16793	30233.2	10948.2	27456.5	49431.3	17900.3
	Pzh_00231	0	130.944	49.1758	143.251	16.8813	80.4024	234.216	27.6009	16842.1	30376.4	10965.1	27536.9	49665.5	17927.9
	Pzh_02275	0	132.5	49.9614	145.54	17.1509	81.6869	237.957	28.0418	16892.1	30522	10982.2	27618.6	49903.4	17955.9
	Pzh_02249	0	132.933	50.1806	146.178	17.2262	82.0453	239.001	28.1648	16942.3	30668.2	10999.4	27700.6	50142.4	17984.1
	Pzh_00297	0	133.115	50.2728	146.447	17.2578	82.196	239.44	28.2165	16992.5	30814.6	11016.7	27782.8	50381.9	18012.3
	Pzh_00296	0	133.26	50.3462	146.661	17.283	82.3161	239.79	28.2578	17042.9	30961.3	11034	27865.1	50621.7	18040.6
	Pzh_02226	0	133.672	50.5552	147.269	17.3548	82.6578	240.785	28.3751	17093.4	31108.5	11051.3	27947.8	50862.5	18068.9
	Pzh_00307	0	134.972	51.2161	149.195	17.5817	83.7383	243.933	28.746	17144.7	31257.7	11068.9	28031.5	51106.4	18097.7
	Pzh_00123	0	135.553	51.5122	150.057	17.6833	84.2224	245.343	28.9122	17196.2	31407.8	11086.6	28115.7	51351.7	18126.6
	Pzh_00115	0	136.586	52.0394	151.593	17.8643	85.0844	247.854	29.2081	17248.2	31559.4	11104.5	28200.8	51599.6	18155.8
	Pzh_00282	0	137.296	52.4025	152.651	17.9889	85.6781	249.584	29.4119	17300.6	31712	11122.5	28286.5	51849.2	18185.2
	Pzh_00169	0	137.553	52.5344	153.035	18.0342	85.8937	250.212	29.4859	17353.2	31865.1	11140.5	28372.4	52099.4	18214.7
	Pzh_00284	0	137.654	52.5862	153.186	18.052	85.9785	250.459	29.515	17405.7	32018.3	11158.5	28458.4	52349.9	18244.2
	Pzh_00058	0	137.698	52.6086	153.251	18.0597	86.0151	250.566	29.5276	17458.3	32171.5	11176.6	28544.4	52600.4	18273.7
	Pzh_00046	0	140.799	54.2043	157.899	18.6075	88.624	258.165	30.4232	17512.6	32329.4	11195.2	28633	52858.6	18304.2
	Pzh_00124	0	141.022	54.3195	158.235	18.647	88.8124	258.714	30.4879	17566.9	32487.6	11213.9	28721.8	53117.3	18334.7
	Pzh_02262	0	141.15	54.3855	158.427	18.6697	88.9203	259.029	30.5249	17621.3	32646.1	11232.5	28810.8	53376.3	18365.2
	Pzh_00197	0	141.672	54.6559	159.215	18.7625	89.3624	260.316	30.6767	17675.9	32805.3	11251.3	28900.1	53636.6	18395.9
	Pzh_00270	0	142.082	54.868	159.833	18.8353	89.7092	261.327	30.7957	17730.8	32965.1	11270.1	28989.8	53898	18426.7
	Pzh_00190	0	144.41	56.0779	163.357	19.2506	91.6874	267.089	31.4748	17786.9	33128.5	11289.4	29081.5	54165.1	18458.1
	Pzh_00159	0	144.637	56.1958	163.701	19.2911	91.8801	267.65	31.5409	17843.1	33292.2	11308.7	29173.4	54432.7	18489.7
	Pzh_00252	0	145.084	56.4289	164.38	19.3711	92.2613	268.761	31.6718	17899.5	33456.6	11328	29265.7	54701.5	18521.3
	Pzh_00278	0	146.113	56.9669	165.947	19.5558	93.1409	271.323	31.9738	17956.5	33622.5	11347.6	29358.8	54972.8	18553.3
	Pzh_00018	0	146.605	57.2245	166.697	19.6443	93.5621	272.55	32.1184	18013.7	33789.2	11367.2	29452.4	55245.3	18585.4
	Pzh_00277	0	146.828	57.3412	167.037	19.6843	93.7529	273.106	32.1839	18071	33956.2	11386.9	29546.1	55518.4	18617.6
	Pzh_00121	0	146.839	57.347	167.054	19.6863	93.7624	273.134	32.1871	18128.4	34123.3	11406.6	29639.9	55791.6	18649.8
	Pzh_00220	0	146.873	57.3648	167.106	19.6924	93.7914	273.218	32.1971	18185.7	34290.4	11426.3	29733.7	56064.8	18682
	Pzh_00163	0	147.041	57.4529	167.363	19.7226	93.9354	273.638	32.2465	18243.2	34457.8	11446	29827.6	56338.4	18714.2
	Pzh_00066	9.33	21.618	9.33	9.33	9.33	15.2546	15.2546	15.2546	18252.5	34467.1	11455.4	29842.9	56353.7	18729.5
	Pzh_00133	0	147.485	57.6857	168.041	19.8026	94.3162	274.747	32.3772	18310.2	34635.1	11475.2	29937.2	56628.4	18761.9
	Pzh_00129	0	148.927	58.4437	170.249	20.0628	95.5555	278.357	32.8027	18368.6	34805.4	11495.2	30032.7	56906.8	18794.7
	Pzh_00290	0	149.182	58.5779	170.64	20.1088	95.7749	278.996	32.878	18427.2	34976	11515.3	30128.5	57185.8	18827.6
	Pzh_00381	0	149.967	58.992	171.846	20.251	96.452	280.969	33.1104	18486.2	35147.9	11535.6	30225	57466.8	18860.7
	Pzh_00279	0	151.31	59.7016	173.913	20.4946	97.6121	284.348	33.5087	18545.9	35321.8	11556.1	30322.6	57751.1	18894.2
	Pzh_00135	0	151.588	59.8491	174.343	20.5452	97.8533	285.051	33.5915	18605.8	35496.1	11576.6	30420.4	58036.2	18927.8
	Pzh_00179	0	151.676	59.8955	174.478	20.5612	97.9292	285.272	33.6175	18665.7	35670.6	11597.2	30518.3	58321.4	18961.4
	Pzh_00060	0	153.385	60.8027	177.121	20.8726	99.4124	289.592	34.1267	18726.5	35847.7	11618.1	30617.8	58611	18995.5
	Pzh_00228	0	153.788	61.0171	177.745	20.9462	99.7629	290.613	34.247	18787.5	36025.5	11639	30717.5	58901.6	19029.8
	Pzh_00107	15.5	63.541	15.5	15.5	15.5	25.3425	25.3425	25.3425	18803	36041	11654.5	30742.9	58927	19055.1
	Pzh_00267	0	157.648	63.081	183.757	21.6547	103.137	300.443	35.4054	18866.1	36224.7	11676.2	30846	59227.4	19090.5
	Pzh_00176	0	159.098	63.8607	186.029	21.9223	104.412	304.157	35.843	18929.9	36410.8	11698.1	30950.4	59531.6	19126.4
	Pzh_00130	0	162.39	65.6394	191.21	22.5329	107.32	312.629	36.8413	18995.6	36602	11720.6	31057.7	59844.2	19163.2
	Pzh_00273	0	162.533	65.717	191.436	22.5596	107.447	312.998	36.8849	19061.3	36793.4	11743.2	31165.2	60157.2	19200.1
	Pzh_00204	0	167.968	68.6822	200.074	23.5775	112.295	327.121	38.5492	19130	36993.5	11766.7	31277.5	60484.3	19238.6
	Pzh_00240	0	169.288	69.4073	202.186	23.8264	113.481	330.574	38.9561	19199.4	37195.7	11790.6	31391	60814.9	19277.6
	Haf_00333	0	171.308	359.782	653.869	197.965	588.244	1069.08	323.673	19559.1	37849.5	11988.5	31979.2	61884	19601.3
	Pzh_02251	0	173.077	71.4996	208.281	24.5447	116.902	340.54	40.1305	19630.6	38057.8	12013.1	32096.1	62224.5	19641.4
	Pzh_00052	0	174.611	72.3515	210.763	24.8371	118.295	344.597	40.6086	19703	38268.6	12037.9	32214.4	62569.1	19682
	Pzh_00134	0	175.67	72.9408	212.479	25.0394	119.258	347.404	40.9394	19775.9	38481.1	12063	32333.7	62916.5	19722.9
	Pzh_00309	0	175.765	72.9935	212.633	25.0575	119.344	347.655	40.969	19848.9	38693.7	12088	32453	63264.2	19763.9
	Pzh_00261	0	175.876	73.0552	212.813	25.0787	119.445	347.949	41.0036	19922	38906.5	12113.1	32572.4	63612.1	19804.9
	Pzh_00138	0	176.108	73.1845	213.19	25.1231	119.657	348.565	41.0762	19995.2	39119.7	12138.2	32692.1	63960.7	19846
	Pzh_02248	0	177.126	73.753	214.846	25.3182	120.586	351.273	41.3953	20068.9	39334.5	12163.5	32812.7	64312	19887.4
	Pzh_00319	0	178.488	74.5148	217.065	25.5797	121.832	354.901	41.8229	20143.4	39551.6	12189.1	32934.5	64666.9	19929.2
	Pzh_00221	0	179.676	75.1808	219.005	25.8083	122.921	358.073	42.1966	20218.6	39770.6	12214.9	33057.4	65024.9	19971.4
	Pzh_00108	3	23.384	3	3	3	4.905	4.905	4.905	20221.6	39773.6	12217.9	33062.3	65029.8	19976.3
	Pzh_00109	7.67	33.157	7.67	7.67	7.67	12.5404	12.5404	12.5404	20229.3	39781.3	12225.6	33074.9	65042.4	19988.8
	Pzh_02252	0	183.993	77.6145	226.094	26.6438	126.9	369.664	43.5626	20306.9	40007.4	12252.2	33201.8	65412	20032.4
	Pzh_02263	0	185.7	78.5821	228.913	26.976	128.482	374.273	44.1057	20385.5	40236.3	12279.2	33330.3	65786.3	20076.5
	Haf_00334	0	186.249	372.508	676.998	204.968	609.051	1106.89	335.122	20758	40913.3	12484.2	33939.3	66893.2	20411.6
	Pzh_00122	229	298.135	229	229	229	374.415	374.415	374.415	20987	41142.3	12713.2	34313.7	67267.6	20786.1
	Pzh_00154	0	187.882	79.8231	232.528	27.402	130.511	380.183	44.8023	21066.8	41374.8	12740.6	34444.2	67647.8	20830.9
	Pzh_00152	0	188.703	80.2915	233.892	27.5628	131.277	382.414	45.0651	21147.1	41608.7	12768.1	34575.5	68030.2	20875.9
	Pzh_00274	0	190.172	81.1316	236.34	27.8512	132.65	386.415	45.5366	21228.2	41845	12796	34708.2	68416.6	20921.5
	Pzh_00196	0	190.636	81.3974	237.114	27.9424	133.085	387.681	45.6858	21309.6	42082.1	12823.9	34841.3	68804.3	20967.1
	Pzh_02254	0	191.74	82.0305	238.958	28.1597	134.12	390.697	46.0412	21391.7	42321.1	12852.1	34975.4	69195	21013.2
	Pzh_00146	0	193.227	82.8847	241.446	28.453	135.516	394.765	46.5206	21474.6	42562.6	12880.6	35110.9	69589.8	21059.7
	Pzh_00157	0	195.454	84.1692	245.188	28.8939	137.617	400.883	47.2415	21558.7	42807.7	12909.4	35248.5	69990.7	21106.9
	Pzh_00245	0	197.9	85.5854	249.314	29.3801	139.932	407.628	48.0364	21644.3	43057.1	12938.8	35388.4	70398.3	21155
	Pzh_00214	0	197.952	85.6153	249.401	29.3904	139.981	407.771	48.0532	21729.9	43306.5	12968.2	35528.4	70806.1	21203
	Pzh_00126	29.33	73.427	29.33	29.33	29.33	47.9545	47.9545	47.9545	21759.3	43335.8	12997.5	35576.4	70854	21251
	Pzh_00306	0	200.89	87.3247	254.38	29.9772	142.776	415.912	49.0127	21846.6	43590.2	13027.5	35719.2	71269.9	21300
	Haf_00325	0	205.348	387.936	705.036	213.456	634.276	1152.73	349.001	22234.5	44295.2	13241	36353.4	72422.7	21649
	Pzh_00158	0	205.618	90.0931	262.445	30.9275	147.302	429.097	50.5664	22324.6	44557.6	13271.9	36500.7	72851.8	21699.6
	Pzh_00102	0	206.45	90.5828	263.871	31.0956	148.103	431.43	50.8413	22415.2	44821.5	13303	36648.8	73283.2	21750.4
	Pzh_00149	0	206.757	90.7638	264.399	31.1577	148.399	432.292	50.9429	22506	45085.9	13334.2	36797.2	73715.5	21801.4
	Pzh_02256	0	208.819	91.9803	267.942	31.5753	150.388	438.086	51.6257	22597.9	45353.9	13365.7	36947.6	74153.6	21853
	Pzh_00142	0	209.416	92.3332	268.97	31.6965	150.965	439.767	51.8238	22690.3	45622.8	13397.4	37098.6	74593.3	21904.8
	Pzh_00127	27	33.494	27	27	27	44.145	44.145	44.145	22717.3	45649.8	13424.4	37142.7	74637.5	21948.9
	Pzh_00375	0	212.002	93.8661	273.436	32.2227	153.471	447.068	52.6842	22811.1	45923.3	13456.7	37296.2	75084.5	22001.6
	Pzh_00292	0	213.618	94.8271	276.235	32.5526	155.042	451.645	53.2235	22906	46199.5	13489.2	37451.2	75536.2	22054.9
	Pzh_01456	0	216.79	96.7212	281.753	33.2028	158.139	460.666	54.2866	23002.7	46481.3	13522.4	37609.4	75996.9	22109.1
	Pzh_01950	0	217.022	96.86	282.157	33.2505	158.366	461.327	54.3645	23099.5	46763.4	13555.7	37767.8	76458.2	22163.5
	Pzh_02255	0	222.377	100.08	291.538	34.3559	163.631	476.664	56.1719	23199.6	47055	13590	37931.4	76934.8	22219.7
	Pzh_02240	0	225	101.667	296.161	34.9007	166.226	484.223	57.0627	23301.3	47351.1	13624.9	38097.6	77419.1	22276.7
	Pzh_02241	0	226.258	102.431	298.386	35.1629	167.475	487.86	57.4913	23403.7	47649.5	13660.1	38265.1	77906.9	22334.2
	Pzh_00370	0	229.775	104.573	304.624	35.8981	170.976	498.061	58.6934	23508.3	47954.1	13696	38436.1	78405	22392.9
	Pzh_00155	9.67	103.566	9.67	9.67	9.67	15.8104	15.8104	15.8104	23518	47963.8	13705.6	38451.9	78420.8	22408.7
	Pzh_00226	0	232.437	106.201	309.368	36.4571	173.639	505.817	59.6074	23624.2	48273.2	13742.1	38625.5	78926.6	22468.3
	Pzh_00004	0	233.246	106.698	310.814	36.6275	174.45	508.181	59.886	23730.9	48584	13778.7	38800	79434.8	22528.2
	Pzh_00348	0	233.252	106.701	310.825	36.6287	174.456	508.198	59.888	23837.6	48894.8	13815.4	38974.4	79943	22588.1
	Haf_00311	0	233.677	409.347	743.948	225.237	669.282	1216.36	368.263	24246.9	49638.7	14040.6	39643.7	81159.4	22956.4
	Pzh_00229	0	233.771	107.02	311.753	36.7381	174.977	509.716	60.0668	24353.9	49950.5	14077.3	39818.7	81669.1	23016.4
	Pzh_00185	53.33	147.081	53.33	53.33	53.33	87.1945	87.1945	87.1945	24407.3	50003.8	14130.7	39905.9	81756.3	23103.6
	Pzh_02239	0	240.653	111.268	324.129	38.1966	181.924	529.952	62.4515	24518.5	50328	14168.9	40087.8	82286.2	23166.1
	Pzh_00065	0	241.848	112.01	326.291	38.4513	183.137	533.485	62.8679	24630.5	50654.2	14207.3	40270.9	82819.7	23229
	Pzh_00321	0	245.17	114.079	332.317	39.1615	186.519	543.339	64.0291	24744.6	50986.6	14246.5	40457.4	83363	23293
	Pzh_00008	0	245.588	114.34	333.078	39.2512	186.947	544.583	64.1757	24859	51319.6	14285.7	40644.4	83907.6	23357.2
	Pzh_00207	0	245.638	114.371	333.169	39.2619	186.997	544.731	64.1932	24973.3	51652.8	14325	40831.4	84452.4	23421.4
	Haf_00337	0	246.626	418.628	760.816	230.344	684.457	1243.93	376.613	25392	52413.6	14555.3	41515.9	85696.3	23798
	Pzh_00251	0	248.089	115.906	337.638	39.7885	189.506	552.037	65.0542	25507.9	52751.3	14595.1	41705.4	86248.3	23863
	Haf_00341	0	252.067	422.443	767.749	232.443	690.694	1255.27	380.045	25930.3	53519	14827.6	42396.1	87503.6	24243.1
	Pzh_00120	0	255.587	120.629	351.398	41.4101	197.229	574.536	67.7056	26050.9	53870.4	14869	42593.3	88078.1	24310.8
	Pzh_00178	0	261.073	124.116	361.555	42.607	202.93	591.143	69.6625	26175.1	54232	14911.6	42796.2	88669.3	24380.4
	Pzh_00206	0	262.185	124.826	363.622	42.8506	204.09	594.522	70.0608	26299.9	54595.6	14954.4	43000.3	89263.8	24450.5
	Pzh_00186	53.33	236.732	53.33	53.33	53.33	87.1945	87.1945	87.1945	26353.2	54648.9	15007.8	43087.5	89351	24537.7
	Pzh_01769	0	274.595	132.816	386.9	45.5937	217.155	632.581	74.5458	26486	55035.8	15053.4	43304.6	89983.6	24612.2
	Pzh_00250	0	282.549	138.004	402.01	47.3744	225.636	657.286	77.4571	26624	55437.8	15100.7	43530.3	90640.9	24689.7
	Pzh_00217	0	285.23	139.764	407.137	47.9786	228.514	665.669	78.445	26763.8	55845	15148.7	43758.8	91306.5	24768.1
	Pzh_02250	0	286.818	140.809	410.181	48.3373	230.222	670.646	79.0315	26904.6	56255.1	15197	43989	91977.2	24847.2
	Pzh_00372	0	289.3	142.446	414.95	48.8993	232.899	678.444	79.9504	27047	56670.1	15245.9	44221.9	92655.6	24927.1
	Pzh_00187	31.33	187.714	31.33	31.33	31.33	51.2246	51.2246	51.2246	27078.4	56701.4	15277.3	44273.1	92706.8	24978.3
	Haf_00321	0	291.009	448.44	814.995	246.748	733.199	1332.52	403.432	27526.8	57516.4	15524	45006.3	94039.4	25381.8
	Pzh_00192	41.33	125.85	41.33	41.33	41.33	67.5746	67.5746	67.5746	27568.1	57557.8	15565.4	45073.9	94106.9	25449.4
	Pzh_00200	38.67	326.511	38.67	38.67	38.67	63.2255	63.2255	63.2255	27606.8	57596.4	15604	45137.1	94170.2	25512.6
	Pzh_00298	0	298.363	148.465	432.484	50.9656	242.74	707.112	83.3288	27755.3	58028.9	15655	45379.9	94877.3	25595.9
	Pzh_00234	0	302.736	151.391	441.009	51.9702	247.525	721.05	84.9713	27906.7	58469.9	15707	45627.4	95598.3	25680.9
	Pzh_00246	0	308.699	155.406	452.705	53.3485	254.089	740.172	87.2247	28062.1	58922.6	15760.3	45881.5	96338.5	25768.1
	Pzh_00380	0	309.375	155.863	454.035	53.5052	254.836	742.347	87.481	28217.9	59376.7	15813.8	46136.3	97080.8	25855.6
	Pzh_00232	0	309.832	156.172	454.935	53.6112	255.341	743.818	87.6544	28374.1	59831.6	15867.4	46391.7	97824.7	25943.2
	Pzh_00294	0	309.877	156.202	455.024	53.6218	255.391	743.965	87.6716	28530.3	60286.6	15921	46647.1	98568.6	26030.9
	Pzh_00377	0	316.325	160.578	467.771	55.1239	262.545	764.805	90.1276	28690.9	60754.4	15976.2	46909.6	99333.4	26121
	Pzh_00312	0	316.342	160.59	467.805	55.128	262.565	764.862	90.1342	28851.5	61222.2	16031.3	47172.2	100098	26211.2
	Haf_00313	0	316.511	464.376	843.958	255.516	759.255	1379.87	417.769	29315.9	62066.2	16286.8	47931.4	101478	26628.9
	Pzh_00202	32.33	155.737	32.33	32.33	32.33	52.8595	52.8595	52.8595	29348.2	62098.5	16319.1	47984.3	101531	26681.8
	Pzh_00317	0	319.727	162.9	474.535	55.921	266.342	775.865	91.4308	29511.1	62573	16375.1	48250.6	102307	26773.2
	Pzh_00299	0	325.161	166.625	485.386	57.1998	272.432	793.606	93.5216	29677.7	63058.4	16432.3	48523.1	103100	26866.8
	Pzh_00219	238.33	209.586	238.33	238.33	238.33	389.67	389.67	389.67	29916	63296.7	16670.6	48912.7	103490	27256.4
	Pzh_00238	0	326.917	167.833	488.906	57.6145	274.408	799.361	94.1997	30083.9	63785.6	16728.2	49187.1	104290	27350.6
	Pzh_02253	0	327.843	168.472	490.765	57.8336	275.451	802.4	94.5579	30252.3	64276.4	16786	49462.6	105092	27445.2
	Pzh_00305	0	328.261	168.76	491.605	57.9326	275.923	803.774	94.7198	30421.1	64768	16844	49738.5	105896	27539.9
	Haf_00338	0	331.039	473.121	859.85	260.328	773.552	1405.86	425.636	30894.2	65627.9	17104.3	50512.1	107302	27965.5
	Pzh_00301	0	335.006	173.429	505.206	59.5354	283.557	826.012	97.3404	31067.7	66133.1	17163.8	50795.6	108128	28062.9
	Pzh_00222	3978	1078.63	3978	3978	3978	6504.03	6504.03	6504.03	35045.7	70111.1	21141.8	57299.7	114632	34566.9
	Pzh_00139	0	343.329	179.234	522.117	61.5283	293.048	853.662	100.599	35224.9	70633.2	21203.4	57592.7	115485	34667.5
	Pzh_00310	0	349.62	183.654	534.993	63.0456	300.275	874.713	103.08	35408.5	71168.2	21266.4	57893	116360	34770.6
	Pzh_00201	0	349.901	183.852	535.569	63.1135	300.599	875.656	103.191	35592.4	71703.7	21329.5	58193.6	117236	34873.8
	Pzh_00300	0	352.885	185.96	541.708	63.8369	304.044	885.692	104.373	35778.4	72245.5	21393.4	58497.6	118121	34978.2
	Pzh_00241	84	230.194	84	84	84	137.34	137.34	137.34	35862.4	72329.5	21477.4	58635	118259	35115.5
	Pzh_00242	346	353.605	346	346	346	565.71	565.71	565.71	36208.4	72675.5	21823.4	59200.7	118824	35681.2
	Pzh_00055	0	355.588	187.873	547.282	64.4937	307.172	894.805	105.447	36396.2	73222.7	21887.9	59507.8	119719	35786.6
	Pzh_00203	0	358.274	189.779	552.835	65.1482	310.289	903.885	106.517	36586	73775.6	21953	59818.1	120623	35893.2
	Pzh_00253	0	363.42	193.446	563.516	66.4069	316.284	921.349	108.575	36779.5	74339.1	22019.4	60134.4	121544	36001.7
	Pzh_00263	0	365.007	194.58	566.819	66.7961	318.138	926.749	109.212	36974	74905.9	22086.2	60452.6	122471	36111
	Pzh_02260	0	388.137	211.3	615.525	72.5358	345.475	1006.38	118.596	37185.3	75521.4	22158.7	60798	123478	36229.5
	Pzh_00199	0	396.863	217.698	634.163	74.7321	355.936	1036.86	122.187	37403	76155.6	22233.5	61154	124514	36351.7
	Pzh_00224	0	400.204	220.161	641.337	75.5776	359.963	1048.59	123.569	37623.2	76796.9	22309.1	61513.9	125563	36475.3
	Pzh_00028	0	401.911	221.421	645.01	76.0104	362.024	1054.59	124.277	37844.6	77441.9	22385.1	61875.9	126618	36599.6
	Pzh_02257	0	406.546	224.854	655.01	77.1889	367.637	1070.94	126.204	38069.5	78096.9	22462.3	62243.6	127689	36725.8
	Pzh_00266	22.33	94.762	22.33	22.33	22.33	36.5095	36.5095	36.5095	38091.8	78119.3	22484.6	62280.1	127725	36762.3
	Pzh_02259	0	421.942	236.353	688.505	81.136	386.436	1125.71	132.657	38328.2	78807.8	22565.7	62666.5	128851	36895
	Pzh_00223	0	426.621	239.876	698.767	82.3454	392.197	1142.48	134.635	38568	79506.5	22648.1	63058.7	129993	37029.6
	Pzh_00034	0	440.032	250.046	728.396	85.8369	408.826	1190.93	140.343	38818.1	80234.9	22733.9	63467.6	131184	37169.9
	Pzh_00269	55	84.702	55	55	55	89.925	89.925	89.925	38873.1	80289.9	22788.9	63557.5	131274	37259.9
	Pzh_00326	0	443.44	252.649	735.976	86.7302	413.081	1203.32	141.804	39125.7	81025.9	22875.6	63970.6	132477	37401.7
	Pzh_00188	0	445.116	253.931	739.71	87.1703	415.176	1209.43	142.523	39379.7	81765.6	22962.8	64385.7	133687	37544.2
	Pzh_00367	0	447.186	255.516	744.329	87.7146	417.769	1216.98	143.413	39635.2	82510	23050.5	64803.5	134904	37687.6
	Pzh_00268	0	454.083	260.817	759.771	89.5343	426.436	1242.23	146.389	39896	83269.7	23140.1	65229.9	136146	37834
	Pzh_00289	0	456.06	262.342	764.213	90.0578	428.929	1249.49	147.245	40158.3	84033.9	23230.1	65658.9	137396	37981.2
	Pzh_00227	0	478.746	279.998	815.647	96.1189	457.797	1333.58	157.154	40438.3	84849.6	23326.2	66116.7	138729	38138.4
	Pzh_00302	0	484.786	284.748	829.482	97.7493	465.563	1356.2	159.82	40723.1	85679.1	23424	66582.2	140085	38298.2
	Haf_00322	0	503.67	563.301	1023.74	309.948	920.996	1673.82	506.765	41286.4	86702.8	23733.9	67503.2	141759	38805
	Pzh_00280	0	508.968	303.966	885.466	104.347	496.985	1447.74	170.607	41590.3	87588.3	23838.3	68000.2	143207	38975.6
	Pzh_00311	0	516.729	310.201	903.627	106.487	507.178	1477.43	174.106	41900.5	88491.9	23944.8	68507.4	144684	39149.7
	Pzh_00340	0	519.972	312.816	911.246	107.385	511.454	1489.89	175.574	42213.4	89403.2	24052.1	69018.8	146174	39325.3
	Pzh_00366	0	545.863	333.89	972.635	114.619	545.91	1590.26	187.402	42547.3	90375.8	24166.8	69564.8	147764	39512.7
	Pzh_00304	0	566.172	350.662	1021.49	120.377	573.332	1670.14	196.816	42897.9	91397.3	24287.1	70138.1	149435	39709.5
	Pzh_00285	0	602.258	380.972	1109.79	130.781	622.889	1814.5	213.828	43278.9	92507.1	24417.9	70761	151249	39923.3
	Pzh_02258	0	634.734	408.786	1190.81	140.33	668.365	1946.97	229.439	43687.7	93697.9	24558.3	71429.3	153196	40152.7
	Pzh_00239	0	756.391	517.216	1506.67	177.552	845.648	2463.41	290.297	44204.9	95204.6	24735.8	72275	155659	40443
	Pzh_00346	0	787.025	545.514	1589.1	187.266	891.915	2598.19	306.18	44750.4	96793.7	24923.1	73166.9	158258	40749.2
	Pzh_00347	0	787.332	545.799	1589.94	187.364	892.382	2599.55	306.34	45296.2	98383.6	25110.4	74059.3	160857	41055.6
	Pzh_00011	0	805.486	562.751	1639.32	193.183	920.098	2680.28	315.855	45858.9	100023	25303.6	74979.4	163537	41371.4
	Pzh_00010	0	928.242	680.721	1982.97	233.681	1112.98	3242.15	382.068	46539.7	102006	25537.3	76092.4	166780	41753.5
	Pzh_00308	0	937.503	689.849	2009.56	236.814	1127.9	3285.63	387.191	47229.5	104015	25774.1	77220.3	170065	42140.7
	Pzh_00345	0	957.306	709.47	2066.72	243.55	1159.98	3379.08	398.204	47939	106082	26017.7	78380.2	173444	42538.9
	Pzh_00344	0	1016.55	768.993	2240.11	263.983	1257.3	3662.58	431.612	48708	108322	26281.6	79637.6	177107	42970.5
	Pzh_00287	6	182.245	6	6	6	9.81	9.81	9.81	48714	108328	26287.6	79647.4	177117	42980.3
	Pzh_00105	0	1148.66	905.979	2639.15	311.008	1481.28	4315.02	508.498	49620	110967	26598.7	81128.6	181432	43488.8
	Pzh_00254	0	1170.83	929.512	2707.71	319.086	1519.75	4427.1	521.706	50549.5	113675	26917.7	82648.4	185859	44010.5
	Pzh_02247	0	1190.24	950.245	2768.1	326.204	1553.65	4525.85	533.343	51499.7	116443	27243.9	84202	190385	44543.8
	Pzh_02219	71.33	418.291	71.33	71.33	71.33	116.625	116.625	116.625	51571	116515	27315.3	84318.7	190501	44660.5
	Pzh_02245	0	1326.38	1098.85	3201.01	377.219	1796.63	5233.65	616.753	52669.9	119716	27692.5	86115.3	195735	45277.2
	Pzh_00322	0	1503.43	1300.03	3787.04	446.279	2125.55	6191.8	729.666	53969.9	123503	28138.8	88240.8	201927	46006.9
	Pzh_00323	0	1553.05	1357.91	3955.66	466.15	2220.19	6467.5	762.155	55327.8	127458	28604.9	90461	208394	46769
	Pzh_02279	0	1750.58	1594.55	4644.98	547.382	2607.08	7594.54	894.969	56922.4	132103	29152.3	93068.1	215989	47664
	Pzh_00225	0	1865.69	1736.77	5059.29	596.205	2839.62	8271.93	974.796	58659.2	137163	29748.5	95907.7	224261	48638.8
	Pzh_00160	0	2383.41	2412.38	7027.35	828.13	3944.23	11489.7	1353.99	61071.5	144190	30576.6	99852	235750	49992.8
	Pzh_00218	0	3119.26	3461.21	10082.6	1188.18	5659.08	16485.1	1942.67	64532.7	154273	31764.8	105511	252236	51935.5

## Sheet: 2. Mass per INSPIRE grid cell
					Log-log regession						Log-log regression adjusted							Information from partially cleared Haf_00002
	Dumpsite	Number of Piles	Area of munition piles [m²]	Mass on Area [kg]	Number of objects	Number of objects (high scenario)	Number of objects (low scenario)	Mass [kg]	Mass [kg] (high scenario)	Mass [t] (low scenario)	Number of objects	Number of objects (high scenario)	Number of objects (low scenario)	Mass [kg]	Mass [kg] (high scenario)	Mass [kg] (low scenario)		Property	Value
	Haf	6	994.713	83164.4	2010.55	3653.98	1106.28	75503.3	137220	41544.6	3287.25	5974.26	1808.77	123448	224354	67925.5		Counted Objects	96
	Haf	2	82.495	6897.11	398.115	723.535	219.057	14950.6	27171.3	8226.37	650.918	1182.98	358.159	24444.3	44425.1	13450.1		Cleared Objects	157
	Haf	2	352.978	29511.2	711.175	1292.49	391.314	26707.1	48537.6	14695.2	1162.77	2113.22	639.799	43666.2	79359	24026.7		Area [m²]	263.416
	Haf	23	3325.52	278035	6703.76	9545.95	5139.89	251750	358484	193021	10960.6	15607.6	8403.71	411611	586121	315589		Ratio Cleared	0.267712
	Haf	7	289.315	24188.6	1392.79	2531.26	766.363	52304.1	95057.6	28779.6	2277.21	4138.61	1253	85517.2	155419	47054.7		Mass Cleared [kg]	5895.9
	Haf	1	38.014	3178.21	192.416	349.697	105.874	7225.88	13132.3	3975.94	314.6	571.754	173.104	11814.3	21471.4	6500.66		Area Cleared [m²]	70.5197
	Haf	8	2265.47	189408	3355.42	5327.88	2270.11	126008	200081	85250.4	5486.12	8711.09	3711.62	206023	327132	139384		Mass per Area [kg]	83.6064
	Haf	2	57.153	4778.36	341.782	621.156	188.061	12835.1	23326.6	7062.34	558.814	1015.59	307.48	20985.4	38139	11546.9		Mass per Object [kg]	37.5535
	Haf	1	37.941	3172.11	192.262	349.417	105.789	7220.11	13121.8	3972.77	314.348	571.298	172.966	11804.9	21454.2	6495.47
	Haf	1	21.872	1828.64	152.915	277.908	84.1393	5742.49	10436.4	3159.72	250.016	454.379	137.568	9388.97	17063.5	5166.15
	Haf	1	123.879	10357.1	314.425	571.437	173.008	11807.8	21459.5	6497.06	514.085	934.299	282.868	19305.7	35086.2	10622.7
	Pzh	3	2029.07	169643	1704.1	4964.13	584.992	63995.1	186420	21968.5	2786.21	8116.35	956.461	104632	304797	35918.5
	Pzh	1	634.734	53067.8	408.786	1190.81	140.33	15351.3	44719.1	5269.87	668.365	1946.97	229.439	25099.4	73115.7	8616.23
	Pzh	13	2564.43	214403	1169.54	3406.93	401.485	43920.4	127942	15077.2	1912.2	5570.33	656.429	71809.9	209185	24651.2
	Pzh	4	1022.58	85493.9	523.812	1525.89	179.816	19671	57302.3	6752.73	856.432	2494.82	293.999	32162	93689.3	11040.7
	Pzh	1	60.3227	5043.36	17.3832	50.6379	5.96736	652.799	1901.63	224.095	28.4215	82.7929	9.75664	1067.33	3109.17	366.396
	Pzh	1	1865.69	155983	1736.77	5059.29	596.205	65221.8	189994	22389.6	2839.62	8271.93	974.796	106638	310640	36607
	Pzh	2	104.027	8697.29	29.0351	84.5803	9.96726	1090.37	3176.29	374.306	47.4723	138.289	16.2965	1782.75	5193.23	611.99
	Pzh	6	1236.81	103405	606.903	1767.93	208.34	22791.3	66392.1	7823.9	992.286	2890.57	340.636	37263.8	108551	12792.1
	Pzh	2	43.3183	3621.69	8.80797	25.658	3.02364	330.77	963.547	113.548	14.401	41.9508	4.94364	540.809	1575.4	185.651
	Pzh	16	3620.58	302703	2087.28	6080.33	716.53	78384.7	228338	26908.2	3412.7	9941.34	1171.53	128159	373332	43994.9
	Pzh	7	5222.93	436670	4226.7	11255.3	1813.9	158727	422676	68118.3	6910.66	18402.4	2965.72	259519	691075	111373
	Pzh	1	123.932	10361.5	45.6754	133.054	15.6796	1715.27	4996.65	588.824	74.6792	217.544	25.6362	2804.47	8169.52	962.728
	Pzh	7	4383.85	366518	3015.72	8784.91	1035.25	113251	329904	38877.2	4930.7	14363.3	1692.63	185165	539393	63564.1
	Pzh	3	120.082	10039.6	26.17	26.17	26.17	982.775	982.775	982.775	42.788	42.788	42.788	1606.84	1606.84	1606.84
	Pzh	4	1400.3	117074	994.024	2759.18	388.076	37329.1	103617	14573.6	1625.23	4511.25	634.504	61033	169413	23827.9
	Pzh	10	3059.59	255801	2067.67	6023.22	709.799	77648.4	226193	26655.4	3380.65	9847.96	1160.52	126955	369825	43581.6
	Pzh	15	1864.1	155851	827.899	2411.7	284.204	31090.5	90568	10672.9	1353.62	3943.14	464.674	50833	148079	17450.1
	Pzh	13	1259.83	105330	605.038	1216.65	395.081	22721.3	45689.5	14836.7	989.237	1989.23	645.957	37149.3	74702.4	24257.9
	Pzh	15	3697.54	309138	2413.65	6369.14	1055.79	90641	239184	39648.6	3946.32	10413.6	1726.22	148198	391065	64825.5
	Pzh	1	76.728	6414.95	24.0049	69.9274	8.24051	901.47	2626.02	309.46	39.2481	114.331	13.4732	1473.9	4293.54	505.967
	Pzh	1	101.479	8484.3	34.9312	101.756	11.9913	1311.79	3821.3	450.316	57.1125	166.371	19.6058	2144.78	6247.82	736.267
	Pzh	2	234.976	19645.5	85.5514	249.215	29.3684	3212.76	9358.89	1102.89	139.877	407.466	48.0174	5252.86	15301.8	1803.22
	Pzh	32	5577.72	466333	2873.15	7948.45	1130.88	107897	298492	42468.6	4697.6	12995.7	1848.99	176411	488034	69436.1
	Pzh	10	764.498	63916.9	277.501	808.371	95.2615	10421.1	30357.2	3577.4	453.714	1321.69	155.753	17038.5	49634	5849.05
	Pzh	62	8885.4	742876	4467.18	12079.5	1853.99	167758	453628	69623.8	7303.84	19750	3031.27	274285	741682	113835
	Pzh	25	5762.23	481759	3228.3	9017.73	1240.88	121234	338647	46599.4	5278.27	14744	2028.84	198217	553688	76189.9
	Pzh	1	51.8001	4330.82	14.1702	41.2784	4.8644	532.14	1550.15	182.675	23.1683	67.4901	7.95329	870.05	2534.49	298.674
	Pzh	1	69.893	5843.5	21.1804	61.6994	7.2709	795.399	2317.03	273.048	34.63	100.879	11.8879	1300.48	3788.34	446.433
	Pzh	1	67.8479	5672.52	20.3531	59.2895	6.9869	764.331	2226.53	262.382	33.2774	96.9383	11.4236	1249.68	3640.37	428.995
	Pzh	6	939.899	78581.6	436.436	1271.36	149.821	16389.7	47743.9	5626.32	713.573	2078.67	244.958	26797.2	78061.2	9199.03
	Pzh	7	1339.92	112026	663.966	1934.16	227.929	24934.3	72634.5	8559.53	1085.58	3162.35	372.664	40767.5	118757	13994.8
	Pzh	10	1326.39	110895	581.471	1675.35	205.96	21836.3	62915.2	7734.52	950.705	2739.2	336.745	35702.3	102866	12645.9
	Pzh	9	980.496	81975.7	373.198	1087.14	128.113	14014.9	40825.9	4811.08	610.178	1777.47	209.464	22914.3	66750.4	7866.12
	Pzh	2	58.607	4899.92	13.2045	38.4653	4.5329	495.876	1444.51	170.226	21.5894	62.8907	7.41129	810.757	2361.77	278.32
	Pzh	13	1607.46	134394	747.371	2177.12	256.561	28066.4	81758.6	9634.75	1221.95	3559.6	419.476	45888.6	133675	15752.8
	Pzh	3	125.565	10498.1	32.3412	94.2113	11.1022	1214.53	3537.96	416.927	52.8779	154.035	18.1521	1985.75	5784.57	681.676
	Pzh	51	4378.14	366040	1742.04	5074.62	598.013	65419.5	190570	22457.5	2848.23	8297	977.751	106961	311582	36718
	Pzh	30	6103.46	510289	4072	11138.8	1646.09	152918	418300	61816.5	6657.72	18211.9	2691.36	250021	683920	101070
	Pzh	1	26.4277	2209.53	5.74428	16.7333	1.97192	215.718	628.395	74.0525	9.3919	27.359	3.22409	352.699	1027.43	121.076
	Pzh	8	1661.9	138946	4511.06	5457.51	4186.16	169406	204949	157205	7375.59	8923.02	6844.38	276979	335091	257030
	Pzh	14	3505.56	293088	2006.39	5429.58	831.27	75347.2	203900	31217.1	3280.46	8877.36	1359.13	123193	333376	51040
	Sum	468	85549.5	7.15248e+06	64512.1	154212	31757.7	2.42266e+06	5.79122e+06	1.19261e+06	105477	252137	51923.9	3.96104e+06	9.46864e+06	1.94992e+06
	Sum Haf	54	7589.36	634519	15765.6	25244.7	10549.9	592054	948027	396185	25776.8	41275.1	17249	968008	1.55002e+06	647762
	Sum Pzh	414	77960.1	6.51796e+06	48746.5	128968	21207.9	1.8306e+06	4.84319e+06	796430	79700.6	210862	34674.9	2.99303e+06	7.91862e+06	1.30216e+06
