# Supplementary material for: Munition Piles in the German Baltic Sea: Inventory and Maritime Hazard Perspectives
Source: Copernicus journal article supplement (doi:10.5194/essd-2025-795), 2026-02-23
Supplement: Supplementary file 3 [file Supplement 3_Maritime Hazard Implications.xlsx]

## Sheet: MunitionPileStats
Origin Color Code	Cost Efficiency of EOD
	Risk for Human Health
	Risk for the Economy
	Risk for the Environment
	Risk of Misuse
	Socioeconomic Potential																																	Daten mit ursprünglichen Grids abgleichen!
[Number of Vessels]	PM annoated	Ident	ID_1	area	pileLaye	muniFuze	muniCorr	muniSize_max	muniSize_median	muniBuri	pileNumb		pileVari	current	waveHeight	sediment	environmentalVulnerability	bathingSitedistance	protectedAreasdistance	shippingLanedistance	cabledistance	distance_fish	distance_mussel	contaminatedAreadistance				trafficDensitysum	trafficDensityHHPsum	trafficDensityHHNPsum	trafficDensityECCsum	trafficDensityECNCsum							fishingintensity_fhr	fishingeffort_kwfhr	fishingIntensityValue	ECFish	ECMussels	ECWater
Pile Properies														Environmental Properties				Distance to									Traffic Density						Traffic Density (Gaussian)						Fishing			Contamination
ID	Photomosaic Annotated	Identification	Identification (detail)	Area of the Pile	Layering of Objects on the Pile	State of the Fuze	State of Corrosion of the Casing	Size of the Objects (max)	Size of the Objects (median)	Burial Depth	Number of Objects on the Pile (linear extrapolation)	Number of Objects on the Pile (log-log regression adjusted)	Variability of the Pile	Mean Current Velocity	Mean Wave Height	Sediment Type	Environmental Vulnerability	Distance to Bathing Sites	Distance to Protected Areas	Distance to Shipping Lanes	Distance to Cables	Distance to Fish Sampling Stations	Distance to Mussel Sampling Stations	Distance to Contaminated Area Centroids	Distance to Military Areas	Distance to Sediment Deposits	Traffic Density Cluster ID	Traffic Density Cumulative Buffered All Vessels (500 m)	Traffic Density Cumulative Buffered Passenger Vessels (5000 m)	Traffic Density Cumulative Buffered Non-Passenger Vessels (5000 m)	Traffic Density Cumulative Buffered Cargo Vessels (5000 m)	Traffic Density Cumulative Buffered Non-Cargo Vessels (5000 m)	Traffic Density Gaussian Kernal Smoothing All Vessels	Traffic Density Gaussian Kernal Smoothing Passenger Vessels	Traffic Density Gaussian Kernal Smoothing Non-Passenger Vessels	Traffic Density Gaussian Kernal Smoothing Cargo Vessels	Traffic Density Gaussian Kernal Smoothing Non-Cargo Vessels	Traffic Density Gaussian Kernal Smoothing Non-Passenger/Non-Cargo Vessels	Fishing Intensity (fhr)	Fishing Effort (kwfhr)	Fishing Intensity (value)	Explosive Compounds in Fish	Explosive Compounds in Mussels	Explosive Compounds in Water
Haf_00002	yes	UXO	boxes	263.416	2.25	0	1.25	0.74	0.54	1.5	664	1085.64	1.83	0.0247409	0.186565	FineSand-ModeratelySorted	1.0625	3717.09	3035.7	4075.77	8146.8	1978.5	7.60275	389.094	1809.93	12128.3	3	30.6957	11353	753	110	11996	39.8896	48.0186	0.099243	49.9597	2.0403	47.9194	0	0	0	0.16	0	71.2171
Haf_00311	no	UXO	boxes	233.677							549.141	669.282		0.0246311	0.175134	FineSand-ModeratelySorted	2.8125	2941.63	2865.55	3881.64	8677.13	1416.67	770.199	1154.9	2572.5	12897.7	3	28.795	9580	609	75	10114	31.3316	44.8488	0.0254398	46.5957	1.77232	44.8233	0	0	0	0.16	0	49.4372
Haf_00312	no	UXO	boxes	53.0087							124.571	361.233		0.0246311	0.175134	FineSand-ModeratelySorted	2.8125	2926.99	2851.35	3866.9	8678.33	1418.49	784.706	1170.38	2588.9	12913.5	3	28.6804	9349	601	71	9879	31.3316	44.8488	0.0254398	46.5957	1.77232	44.8233	0	0	0	0.16	0	49.4372
Haf_00313	no	UXO	boxes	316.511							743.801	759.255		0.0246311	0.179441	FineSand-ModeratelySorted	2.8125	3006.07	2835.61	3854.47	8603.76	1486.72	706.274	1094.36	2515.4	12837.8	3	28.7321	9608	612	74	10146	31.3316	44.8488	0.0254398	46.5957	1.77232	44.8233	0	0	0	0.16	0	49.4372
Haf_00314	yes	UXO	boxes	77.2512	2.25	1	1.5	0.58	0.42	1.75	178.33	291.57	1.75	0.0290766	0.181137	FineSand-ModeratelySorted	1.0625	3357.41	2678.41	3704.29	8194.03	1887.91	453.645	829.966	2217.9	12527	3	28.2641	9932	651	81	10502	33.0488	43.2763	0.0376385	45.0451	1.80648	43.2387	0	0	0	0.16	0	49.4372
Haf_00315	yes	UXO	boxes	129.162	2.25	1	1.5	1.63	0.46	1.75	383.67	627.3	2.25	0.0274146	0.183136	FineSand-ModeratelySorted	1.0625	3474.2	2937.06	3963.88	8280.49	1810.21	240.623	633.165	2055.01	12373.4	3	29.9785	10896	704	100	11500	39.8896	43.2763	0.0376385	45.0451	1.80648	43.2387	0	0	0	0.16	0	49.4372
Haf_00316	yes	UXO	boxes	47.4039	2.25	1	1.5	0.93	0.44	1.75	165.33	270.315	2	0.0274146	0.183136	FineSand-ModeratelySorted	1.0625	3472.39	2923.68	3950.57	8271.76	1817.7	244.998	637.964	2059.11	12376.8	3	29.8911	10896	704	100	11500	39.8896	43.2763	0.0376385	45.0451	1.80648	43.2387	0	0	0	0.16	0	49.4372
Haf_00318	yes	UXO	boxes, ??	181.056	2.5	1	1.75	1.33	0.82	1.75	432	706.32	2.75	0.0247409	0.186565	FineSand-ModeratelySorted	1.0625	3671.16	3052.95	4088.72	8200.36	1922.86	48.226	427.857	1850.34	12170.7	3	30.8373	11354	753	110	11997	39.8896	48.0186	0.099243	49.9597	2.0403	47.9194	0	0	0	0.16	0	71.2171
Haf_00319	yes	UXO	boxes	440.17	2	1	1.5	0.78	0.55	1.75	498.67	815.325	2	0.0241841	0.191417	LagSediment/GlacialTill	1.0625	4000.34	2810.7	3893.86	7481.28	2669.41	662.853	530.315	1316.44	11618.7	3	27.7334	11743	809	115	12437	31.9561	38.1133	0.0801761	40.2671	2.23398	38.0331	0	0	0	0.16	1.8	4.16434
Haf_00320	yes	UXO	boxes	289.721	2.5	1	1.5	0.96	0.62	1.75	443.67	725.4	1.75	0.0225196	0.191417	LagSediment/GlacialTill	1.0625	4120.17	2928.02	4001.41	7632.56	2534.45	530.838	375.301	1358.35	11663.7	3	28.6538	12002	822	122	12702	39.008	40.8187	0.0544729	42.73	1.96578	40.7642	0	0	0	0.16	1.8	71.2171
Haf_00321	no	UXO	SC250	291.009							683.871	733.199		0.0229107	0.193421	LagSediment/GlacialTill	1.0625	4359.88	3151.71	4251.25	7697.38	2565.76	628.952	322.017	1165.08	11476.6	3	29.6333	12718	871	138	13451	39.008	43.3052	0.187574	45.4245	2.30691	43.1176	0	0	0	0.16	1.8	71.2171
Haf_00322	no	UXO	Flak grenades, Boxes	503.67							1183.62	920.996		0.0229107	0.193421	LagSediment/GlacialTill	1.0625	4330.5	3158.8	4235.6	7728.13	2522.01	580.224	278.603	1212.8	11524.7	3	29.7271	12668	869	137	13400	39.008	43.3052	0.187574	45.4245	2.30691	43.1176	0	0	0	0.16	1.8	71.2171
Haf_00323	yes	UXO	bombs, rockets, grenades, boxes	1259.02	2.5	1	3.25	1.26	0.73	1.75	552.67	903.615	3.75	0.02285	0.188736	FineSand-PoorlySorted	1.0625	3983.38	3293.31	4353.07	8133.04	2097.78	297.193	148.806	1520.64	11848.4	3	31.6443	12280	826	130	12976	39.8896	45.8076	0.138332	47.7962	2.12684	45.6693	0	0	0	0.16	1.8	71.2171
Haf_00324	yes	UXO	boxes	293.607	2.5	1	2	0.93	0.46	1.75	592.33	968.46	2.25	0.0260725	0.183837	FineSand-ModeratelySorted	1.0625	3522.97	3424.09	4449.8	8653.51	1537.07	514.755	708.199	1956.64	12311.3	3	32.2658	11634	754	118	12270	39.8896	48.0186	0.099243	49.9597	2.0403	47.9194	0	0	0	0.16	0	71.2171
Haf_00325	no	UXO	boxes	205.348							482.568	634.276		0.0276723	0.182769	FineSand-ModeratelySorted	1.0625	3422.68	3307.01	4332.32	8635.52	1507.5	481.15	744.413	2060.3	12407.3	3	31.9396	11303	723	109	11917	39.8896	48.0186	0.099243	49.9597	2.0403	47.9194	0	0	0	0.16	0	49.4372
Haf_00326	no	0	0	93.9161							220.703	458.188		0.0228026	0.19307	LagSediment/GlacialTill	1.0625	4232.06	3441.52	4506.13	8053.81	2282.29	545.8	220.18	1266.02	11597.4	3	31.2645	13315	911	154	14072	39.8896	45.8076	0.138332	47.7962	2.12684	45.6693	0	0	0	0.16	1.8	71.2171
Haf_00327	no	0	0	38.6956							90.9356	316.934		0.0228026	0.19307	LagSediment/GlacialTill	1.0625	4218.56	3433.74	4497.95	8058.13	2271.8	532.218	209.102	1279.79	11611	3	31.2914	13315	911	154	14072	39.8896	45.8076	0.138332	47.7962	2.12684	45.6693	0	0	0	0.16	1.8	71.2171
Haf_00328	no	0	0	103.623							243.514	477.31		0.0228026	0.19307	LagSediment/GlacialTill	1.0625	4191.11	3416.63	4480.11	8065.83	2251.23	504.015	186.583	1307.92	11638.6	3	31.347	13112	885	149	13848	39.8896	45.8076	0.138332	47.7962	2.12684	45.6693	0	0	0	0.16	1.8	71.2171
Haf_00329	no	0	0	28.1055							66.0468	277.482		0.0228026	0.19307	LagSediment/GlacialTill	1.0625	4177.05	3405.55	4468.73	8067.76	2241.9	488.435	173.598	1322.59	11652.9	3	31.3751	13112	885	149	13848	39.8896	45.8076	0.138332	47.7962	2.12684	45.6693	0	0	0	0.16	1.8	71.2171
Haf_00330	no	0	0	130.094							305.721	524.653		0.0228026	0.19307	LagSediment/GlacialTill	1.0625	4162.51	3392.67	4455.58	8068.52	2233.02	471.609	159.302	1337.92	11667.7	3	31.41	13112	885	149	13848	39.8896	45.8076	0.138332	47.7962	2.12684	45.6693	0	0	0	0.16	1.8	71.2171
Haf_00331	no	0	0	93.2393							219.112	456.812		0.0228026	0.191837	LagSediment/GlacialTill	1.0625	4149.72	3380.78	4443.48	8068.75	2225.54	456.518	146.629	1351.49	11680.7	3	31.4271	12937	864	143	13658	39.8896	45.8076	0.138332	47.7962	2.12684	45.6693	0	0	0	0.16	1.8	71.2171
Haf_00332	yes	UXO	boxes	70.1691	2	1	1.5	0.65	0.4	2	258.33	422.37	2	0.0291418	0.181728	FineSand-ModeratelySorted	1.0625	3343.89	2901.72	3927.41	8368.55	1713.98	369.684	760.822	2183.29	12502.7	3	29.6374	10431	679	91	11019	33.0488	43.2763	0.0376385	45.0451	1.80648	43.2387	0	0	0	0.16	0	49.4372
Haf_00333	no	UXO	boxes	171.308							402.574	588.244		0.0246311	0.179441	FineSand-ModeratelySorted	2.8125	2961.5	2793.2	3810.59	8609.07	1490.06	753.519	1143.54	2565.68	12886.4	3	28.3947	9400	606	72	9934	31.3316	44.8488	0.0254398	46.5957	1.77232	44.8233	0	0	0	0.16	0	49.4372
Haf_00334	no	UXO	boxes	186.248							437.685	609.051		0.0246311	0.179441	FineSand-ModeratelySorted	2.8125	2991.64	2814.09	3832.54	8599.83	1493.89	721.937	1111.21	2533	12854.4	3	28.5753	9488	608	73	10023	31.3316	44.8488	0.0254398	46.5957	1.77232	44.8233	0	0	0	0.16	0	49.4372
Haf_00335	no	UXO	SC50	123.93							291.236	514.173		0.0233878	0.19665	LagSediment/GlacialTill	1.0625	4449.38	3100.07	4360.4	7602.98	2734.51	833.132	505.225	956.588	11268.2	3	29.4511	12991	897	146	13742	39.008	43.3052	0.187574	45.4245	2.30691	43.1176	0	0	0	0.16	1.8	71.2171
Haf_00336	no	0	0	123.879							291.116	514.085		0.0299198	0.231923	MediumSilt-VeryPoorlySorted	1.0625	3477.97	3101.89	4642.13	8378.74	5040.6	3885.75	3542.84	0	8694.54	0	61.2205	18745	1502	322	19925	67.303	79.9416	1.29534	81.953	3.30671	78.8361	24.2667	5219.2	1270.24	0.16	1.8	71.2171
Haf_00337	no	UXO	SC250, SC500	246.626							579.571	684.457		0.0240189	0.203654	LagSediment/GlacialTill	1.0625	4674.11	2876.08	4638.74	7251.9	3317.24	1464.7	1129.96	334.754	10642.5	3	28.7019	14734	1108	205	15637	39.008	41.149	0.251415	43.4446	2.54694	40.8976	0	0	0	0.16	1.8	71.2171
Haf_00338	no	UXO	SC250, SC500	331.039							777.942	773.552		0.0240189	0.203654	LagSediment/GlacialTill	1.0625	4679.38	2854.06	4639.89	7220.89	3358.28	1504.04	1170.22	298.29	10605.5	3	28.6042	14760	1109	206	15663	38.4218	41.149	0.251415	43.4446	2.54694	40.8976	0	0	0	0.16	1.8	71.2171
Haf_00341	no	0	0	252.067							592.357	690.694		0.0277193	0.180057	MediumSilt-PoorlySorted	3.375	3179.05	1940.36	3003.54	7460.12	2679.48	1109.51	1307.78	2148.63	12456.5	3	24.2033	9020	634	75	9579	33.0488	30.9557	0.00172132	32.7619	1.80788	30.954	0	0	0	0.16	0	4.16434
Haf_00342	no	0	0	100.911							237.141	472.077		0.0277193	0.176396	MediumSilt-PoorlySorted	3.375	3147.17	1891.38	2945.3	7513.5	2649.98	1149.93	1370.74	2246.7	12554.7	3	23.935	8774	625	72	9327	25.3578	33.6519	0.000330275	35.3561	1.70458	33.6515	0	0	0	0.16	0	4.16434
Haf_00580	no	UXO	torpedo	38.4106							90.2659	315.961		0.0234252	0.196448	FineSand-PoorlySorted	1.0625	4020.95	4152.71	5122.12	8596.44	2262.26	1214.58	983.58	984.857	11393.6	3	35.1286	14521	1020	188	15353	47.4435	57.4907	0.5121	59.6612	2.6826	56.9786	0	0	0	0.16	1.8	71.2171
Haf_00581	no	UXO	torpedo	50.2117							117.998	353.184		0.0234252	0.196448	FineSand-PoorlySorted	1.0625	4056.67	4123.48	5138.19	8562.35	2302	1221.82	980.648	949.134	11355.2	3	34.908	14739	1041	193	15587	47.4435	57.4907	0.5121	59.6612	2.6826	56.9786	0	0	0	0.16	1.8	71.2171
Haf_00582	no	0	0	43.488							102.197	332.695		0.0236494	0.195835	FineSand-PoorlySorted	1.0625	3763.59	4323.71	4809.37	8869.97	2251.69	1485.12	1282.87	947.465	11403.5	3	36.5971	15306	1097	207	16196	47.4435	57.4907	0.5121	59.6612	2.6826	56.9786	0	0	0	0.16	1.8	71.2171
Haf_00583	no	0	0	39.843							93.6311	320.806		0.0260725	0.183837	FineSand-PoorlySorted	1.0625	3564.36	3507.54	4533.28	8695.23	1530.67	575.511	728.04	1913.95	12275.7	3	32.5006	12005	780	125	12660	39.8896	48.0186	0.099243	49.9597	2.0403	47.9194	0	0	0	0.16	0	71.2171
Haf_00584	no	UXO	fuse?	38.8315							91.2552	317.396		0.0260725	0.183837	FineSand-PoorlySorted	1.0625	3583.49	3459.78	4485.64	8632.54	1580.36	511.621	670.856	1895.83	12251.7	3	32.3874	12045	788	126	12707	39.8896	48.0186	0.099243	49.9597	2.0403	47.9194	0	0	0	0.16	0	71.2171
Haf_00585	no	0	0	40.0792							94.1857	321.594		0.0247409	0.184679	FineSand-ModeratelySorted	1.0625	3626.71	3056.71	4089.26	8241.98	1877.02	95.4164	469.915	1891.67	12213.4	3	30.842	11299	741	109	11931	39.8896	48.0186	0.099243	49.9597	2.0403	47.9194	0	0	0	0.16	0	71.2171
Haf_00586	no	0	0	31.8756							74.9086	292.392		0.0231137	0.187989	FineSand-ModeratelySorted	1.0625	3890.11	3067.24	4125.41	8023.53	2129.75	139.065	233.897	1642	11958.3	3	30.5442	11832	782	116	12498	39.8896	45.8076	0.138332	47.7962	2.12684	45.6693	0	0	0	0.16	1.8	71.2171
Haf_00587	no	0	0	43.5563							102.357	332.911		0.0226272	0.186656	LagSediment/GlacialTill	1.0625	3925.73	2807.39	3869.07	7794.02	2315.61	336.838	431.64	1662.6	11968.1	3	28.6954	11222	742	104	11860	33.0488	40.8187	0.0544729	42.73	1.96578	40.7642	0	0	0	0.16	1.8	4.16434
Haf_00588	no	0	0	33.9591							79.8037	300.188		0.0246311	0.179441	FineSand-ModeratelySorted	2.8125	3034.09	2888.81	3908.31	8620.26	1464.53	678.045	1062.09	2479.82	12804.9	3	29.1087	9830	619	78	10371	31.3316	44.8488	0.0254398	46.5957	1.77232	44.8233	0	0	0	0.16	0	49.4372
Haf_00589	no	0	0	41.2958							97.0456	325.618		0.0258794	0.183013	FineSand-PoorlySorted	2.8125	3520.22	3745.92	4770.2	8970.35	1345.27	865.365	986.238	1967.41	12360.3	3	33.5118	12216	798	134	12880	39.8896	53.5275	0.145147	55.8496	2.46725	53.3823	0	0	0	0.16	0	71.2171
Haf_00590	no	UXO	torpedo	40.4226							94.9941	322.739		0.0227773	0.193853	LagSediment/GlacialTill	1.0625	4286.79	3733.71	4796.48	8281.76	2206.85	757.808	499.549	1193.11	11549.2	3	32.6567	13666	935	166	14435	39.8896	51.2924	0.291744	53.3633	2.36272	51.0006	0	0	0	0.16	1.8	71.2171
Haf_00591	no	UXO	torpedo	42.6786							100.296	330.108		0.0227773	0.193853	LagSediment/GlacialTill	1.0625	4310.49	3656.65	4721.14	8187.48	2266.54	717.606	428.894	1173.11	11520.4	3	32.0455	13476	923	159	14240	39.8896	51.2924	0.291744	53.3633	2.36272	51.0006	0	0	0	0.16	1.8	71.2171
Haf_00592	no	0	0	36.943							86.8161	310.884		0.0225803	0.190491	FineSand-PoorlySorted	1.0625	3910.15	4044.67	5086.16	8704.79	1941.93	999.353	855.716	1323.21	11724.8	3	35.4295	14129	979	177	14931	47.4435	58.2765	0.381604	60.7427	2.84787	57.8949	0	0	0	0.16	1.8	71.2171
Haf_00593	no	0	0	38.014							89.3329	314.6		0.0226698	0.191416	FineSand-VeryPoorlySorted	2.8125	3107.51	3767.66	4268.61	9530.22	2027.17	1925.61	1811.52	1207.61	11772.9	3	40.7218	14491	1007	193	15305	59.4483	63.5329	0.566549	66.2768	3.31046	62.972	0	0	0	0.16	1.8	71.2171
Haf_00594	no	0	0	37.1588							87.3237	311.639		0.022382	0.191714	FineSand-PoorlySorted	1.0625	3650.08	4346.44	4841.21	8965.13	2027.4	1382.24	1228.06	1171.69	11626.4	3	37.0121	14657	1031	191	15497	47.4435	58.2765	0.381604	60.7427	2.84787	57.8949	0	0	0	0.16	1.8	71.2171
Haf_00595	no	0	0	39.3345							92.4349	319.096		0.0225827	0.18916	LagSediment/GlacialTill	1.0625	4051.52	2854.71	3922.11	7666.82	2470.54	465.08	399.191	1474.32	11779	3	28.4914	11644	790	114	12320	33.0488	40.8187	0.0544729	42.73	1.96578	40.7642	0	0	0	0.16	1.8	4.16434
Haf_00597	no	0	0	41.6385							97.8517	326.74		0.0227889	0.187831	FineSand-PoorlySorted	1.0625	3904.13	3382.62	4428.74	8279.69	1966.66	340.362	293.225	1587.38	11924.4	3	32.2431	12577	842	137	13282	39.8896	48.0186	0.099243	49.9597	2.0403	47.9194	0	0	0	0.16	1.8	71.2171
Haf_00598	no	0	0	36.2559							85.2016	308.468		0.0228026	0.188736	LagSediment/GlacialTill	1.0625	4073.86	3371.82	4433.45	8124.93	2150.63	400.664	153.404	1425.15	11756	3	31.678	12868	862	142	13588	39.8896	45.8076	0.138332	47.7962	2.12684	45.6693	0	0	0	0.16	1.8	71.2171
Haf_00599	no	0	0	41.1994							96.8177	325.3		0.0233683	0.176164	FineSand-PoorlySorted	2.8125	3059.38	4116.4	5118.03	9740.33	659.54	1588.86	1776.79	2531.71	12998.6	3	33.5737	11158	697	113	11742	42.6135	52.1922	0.0865625	54.5892	2.48357	52.1056	0	0	0	0.16	0	49.4372
Haf_00600	no	0	0	39.3104							92.3785	319.015		0.0242209	0.198311	LagSediment/GlacialTill	1.0625	4332.76	2837.54	4272.67	7323.09	3007.86	1062.02	765.761	784.457	11088.6	3	28.5975	13311	947	159	14099	39.008	43.3052	0.187574	45.4245	2.30691	43.1176	0	0	0	0.16	1.8	71.2171
Haf_00601	no	0	0	28.7283							67.5108	280.023		0.0242736	0.200162	MediumSilt-ModeratelySorted	1.0625	4133.78	4169.29	4989.97	8535.2	2621.65	1545.42	1266.44	602.673	11027.4	3	34.3188	16021	1164	222	16963	48.4633	56.0153	0.637761	57.9445	2.56703	55.3775	0	0	0	0.16	1.8	71.2171
Haf_00602	no	0	0	37.9413							89.1614	314.348		0.0253308	0.204239	MediumSilt-ModeratelySorted	2.8125	4223.97	4248.03	4863.8	8532.54	2924.83	1862.66	1565.35	282.621	10728.1	3	35.81	16443	1207	234	17416	48.4633	64.0362	0.91981	65.9966	2.88021	63.1248	0	0	0	0.16	1.8	71.2171
Haf_00603	no	0	0	28.4247							66.7987	278.791		0.0234392	0.196441	LagSediment/GlacialTill	1.0625	4531.58	3626.91	4879.73	8080.64	2527.02	986.679	657.235	876.746	11226.9	3	31.6676	14588	1039	187	15440	39.008	49.1478	0.375713	51.1713	2.39921	48.7721	0	0	0	0.16	1.8	71.2171
Haf_00605	no	0	0	21.8723							51.3992	250.016		0.0228419	0.205219	LagSediment/GlacialTill	1.0625	4119.87	2120.12	4032.67	6531.15	3806.94	1818.11	1566.09	268.801	10576.7	3	25.9041	12306	948	166	13088	30.8187	33.9148	0.190079	36.5889	2.86422	33.7247	0	0	0	0.16	1.8	4.16434
Kbh_00001	yes	0	0	1361.06	2	1.25	4.25	2.89	1.46	1	227.17	0	3.75	0.0248823	0.298492	MediumSand-ModeratelySorted	5.25	2488.48	0	3599.31	57123.1	953.507	2.33525	1048.1	2055.37	20620.4	1	105.552	600207	83959	554653	129513	279.531	130.788	63.129	76.3491	8.69018	69.7978	0	0	0	4.07548	689.25	8.149
Kbh_00002	no	0	0	30.9239							17.6266	0		0.0261638	0.292552	MediumSand-ModeratelySorted	5.25	2611.55	0	3322.98	57366.8	848.913	6.92038	906.477	2228.39	20393.5	1	160.163	694279	95547	643452	146374	541.184	287.171	200.842	120.048	33.7189	88.4703	0	0	0	4.07548	0.396175	8.149
Kbh_00003	no	0	0	209.914							119.651	0		0.0261638	0.292552	MediumSand-ModeratelySorted	5.25	2612.06	0	3331.74	57353	858.068	7.26151	904.431	2215.51	20398.3	1	159.071	694330	95548	643459	146419	541.184	287.171	200.842	120.048	33.7189	88.4703	0	0	0	4.07548	0.396175	8.149
Kbh_00006	no	0	0	115.3							65.7207	0		0.0317095	0.337249	FineSilt-PoorlySorted	2.8125	4670.65	1017.55	1062.55	58440.9	2647.33	2257.36	1704.02	1879.38	18175.9	2	3323.54	1106883	141529	1028227	220185	5290.36	2843.08	2612.45	699.066	468.433	233.905	0	0	0	4.07548	0.539925	2.14
Kbh_00007	no	0	0	31.2924							17.8367	0		0.031047	0.332893	FineSilt-PoorlySorted	2.8125	4407.12	769.856	1210.71	58612.7	2390.88	2094.14	1672.05	2179.82	18427.9	2	2868.34	1110221	141450	1029865	221806	5290.36	3890.62	3607.75	909.809	626.939	287.054	0	0	0	4.07548	0.539925	2.14
Kbh_00008	no	0	0	47.1088							26.852	0		0.0305873	0.325676	VeryFineSand-ModeratelySorted	2.8125	4185.67	549.946	1325.56	58847.4	2196.6	2033.07	1775.16	2466.86	18657.5	2	2154	1111347	142022	1029411	223958	2795.39	2776.63	2533.66	702.265	459.287	246.885	0	0	0	4.07548	0.539925	2.14
Kbh_00009	no	0	0	48.0025							27.3614	0		0.0305873	0.325676	VeryFineSand-ModeratelySorted	2.8125	4234.49	599.979	1292.38	58814.2	2239.34	2051.42	1762.42	2406.63	18605.7	2	2316.44	1105743	140924	1024554	222113	2795.39	2776.63	2533.66	702.265	459.287	246.885	0	0	0	4.07548	0.539925	2.14
Kbh_00010	no	0	0	220.87							125.896	0		0.0302435	0.323231	VeryFineSand-ModeratelySorted	2.8125	4201.5	532	1216.83	59246.2	2281.11	2267.02	2132.48	2585.37	18697	2	2997.69	1134483	145813	1047962	232334	5538.77	3858.25	3560.52	908.091	610.36	303.024	0	0	0	4.07548	0.539925	13.125
Kbh_00011	no	0	0	125.78							71.6946	0		0.0333387	0.364248	FineSilt-PoorlySorted	0.8125	5839.43	1773.65	893.855	56951	3938.38	3203.97	2327.22	715.653	17490.4	2	4421.77	1094811	138773	1025085	208499	3827	4374.67	4116.7	921.442	663.469	261.151	0	0	0	4.07548	0.445625	2.14
Kbh_00012	no	0	0	47.6102							27.1378	0		0.0319935	0.340575	FineSilt-PoorlySorted	2.8125	4634.77	814.139	1552.89	57540.8	2670.1	2027.77	1215.47	1864.57	18390.8	2	810.429	1062828	136678	991837	207669	2915.05	2929.86	2710.46	689.929	470.525	222.359	0	0	0	4.07548	0.539925	2.14
Kbh_00013	no	0	0	251.278							143.229	0		0.0319935	0.340575	CoarseSand-ModeratelySorted	2.8125	4606	781.751	1586.12	57524.1	2643.98	1997.42	1182.69	1894.03	18423.5	2	704.579	1061673	136601	990928	207346	2915.05	2929.86	2710.46	689.929	470.525	222.359	0	0	0	4.07548	0.539925	2.14
Kbh_00014	no	0	0	57.2395							32.6265	0		0.0247384	0.292406	MediumSand-ModeratelySorted	5.25	2600.85	0	3074.37	57817.6	616.231	441.33	1101.21	2662.06	20275.7	1	173.207	805909	108735	747764	166880	541.184	441.972	337.582	166.353	61.9622	106.763	0	0	0	4.07548	0.539925	8.149
Kbh_00015	no	0	0	71.7671							40.9072	0		0.0276459	0.283326	CoarseSand-ModeratelySorted	5.25	2519.35	0	3042.31	58048.1	495.799	681.029	1329.26	2910.69	20323.4	1	200.329	830097	112032	769222	172907	541.184	254.401	165.481	117.83	28.9107	91.3719	0	0	0	4.07548	0.539925	8.149
Kbh_00016	no	0	0	90.8498							51.7844	0		0.0276459	0.283326	CoarseSand-ModeratelySorted	5.25	2528.1	0	3030.45	58058.9	504.595	690.562	1331.34	2919.37	20313.9	1	203.905	846968	114044	784909	176103	541.184	254.401	165.481	117.83	28.9107	91.3719	0	0	0	4.07548	0.539925	8.149
Kbh_00017	no	0	0	41.7749							23.8117	0		0.0273726	0.286032	CoarseSand-ModeratelySorted	5.25	2450.19	0	3311.42	57607.6	580.277	280.252	1121.04	2500.43	20471	1	141.104	737344	101175	683318	155201	541.184	174.179	98.2647	91.5307	15.6161	78.2069	0	0	0	4.07548	0.539925	8.149
Kbh_00018	no	0	0	23.0987							13.1663	0		0.0273726	0.286032	CoarseSand-ModeratelySorted	5.25	2439.73	0	3317.2	57613.4	568.741	290.814	1132.76	2509.05	20479.6	1	141.384	737115	101163	683150	155128	541.184	174.179	98.2647	91.5307	15.6161	78.2069	0	0	0	4.07548	0.539925	8.149
Pzh_00001	no	0	0	34.3323							12.3596	13.3422		0.0337601	0.291711	FineSilt-PoorlySorted	1.0625	4554.15	2508.92	5269.6	7324.14	3417.3	661.659	1123.93	0	1511.78	4	54.0167	23401	3275	4430	22246	71.0605	75.8432	1.28694	78.9737	4.41739	75.4472	195.633	41975.4	21060.3	0	0	14.0504
Pzh_00002	yes	UXO	large boxes	112.573	1	1	1.25	1.19	1.08	1.25	40.83	66.757	0.5	0.0333198	0.300532	FineSilt-ModeratelySorted	1.0625	5587.76	4463.16	5003.34	5436.19	4354.49	15.4525	1465.68	0	1964.53	4	39.0792	57838	56934	40023	74749	60.2192	48.0532	5.47417	47.1021	4.52304	42.886	195.633	41975.4	21060.3	0	0	12.6
Pzh_00003	no	0	0	21.2317							7.64341	7.0015		0.0341354	0.285411	FineSilt-ModeratelySorted	1.0625	4137.98	3102.05	5027.58	7814.76	2696.64	681.902	1150.62	0	2222.58	4	59.2224	20313	2059	1779	20593	80.0959	83.3068	1.20332	87.373	5.26943	83.1036	195.633	41975.4	21060.3	0	0	14.0504
Pzh_00004	no	UXO	artillery munition, partly open	233.246							83.9685	174.45		0.0342324	0.28146	FineSilt-PoorlySorted	1.0625	3459.61	2726.53	4222.89	8415.5	2842.57	181.971	1968.65	0	2207.81	4	71.427	19441	2071	1254	20258	91.4913	97.6809	1.51929	103.978	7.81687	96.924	195.633	41975.4	21060.3	0	0	14.0504
Pzh_00005	no	0	0	72.2423							26.0072	36.2007		0.0323418	0.296889	Clay-VeryPoorlySorted	1.0625	4863.46	1487.63	5279.03	7057.44	4364.19	786.233	2009.44	0	559.254	4	49.4684	27608	7084	8718	25974	72.9756	70.1046	1.4984	72.3699	3.76376	69.2553	195.633	41975.4	21060.3	0	0	6.77674
Pzh_00006	no	0	0	37.976							13.6714	15.2758		0.030631	0.298936	FineSilt-ModeratelySorted	1.0625	5112.37	548.201	5242.64	7034.37	5162.95	286.068	2949.65	0	723.648	4	41.9843	29661	9336	11026	27971	69.1847	65.8078	2.70798	67.4257	4.32593	63.6459	195.633	41975.4	21060.3	0	2.6	6.77674
Pzh_00007	no	0	0	66.0585							23.781	32.1051		0.030631	0.298936	FineSilt-ModeratelySorted	1.0625	5101.16	554.652	5233.55	7043.28	5151	289.454	2941.99	0	726.398	4	41.8337	29581	9340	11024	27897	69.1847	65.8078	2.70798	67.4257	4.32593	63.6459	195.633	41975.4	21060.3	0	2.6	6.77674
Pzh_00008	no	0	0	245.588							88.4118	186.947		0.030631	0.29804	FineSilt-ModeratelySorted	2.0625	5119.13	468.204	5224.8	7054.56	5219.03	348.109	3028.71	0	782.99	4	41.3447	28838	7741	10190	26389	69.1847	65.8078	2.70798	67.4257	4.32593	63.6459	195.633	41975.4	21060.3	0	2.6	6.77674
Pzh_00009	yes	UXO	small boxes	125.467	1.75	1	1.5	0.4	0.32	2	114	186.39	1.5	0.0300213	0.304022	FineSilt-ModeratelySorted	2.0625	5600.97	539.863	5630.87	6638.62	5662.08	512.992	3279.02	0	579.669	4	50.8607	40281	25752	21809	44224	70.4153	63.1362	5.11955	62.4678	4.45113	58.5005	690.8	149101	139112	0	2.6	6.77674
Pzh_00010	no	UXO	bombs SC500?	928.242							334.167	1112.98		0.0304673	0.302958	FineSilt-ModeratelySorted	2.0625	5478.79	719.33	5622.67	6654.71	5385.85	216.433	2957.37	0	416.977	4	54.7743	38540	21747	19628	40659	70.4153	61.316	3.89244	60.996	3.57242	57.8318	195.633	41975.4	21060.3	0	2.6	6.77674
Pzh_00011	no	UXO	bombs SC500?	805.486							289.975	920.098		0.0302926	0.302958	FineSilt-ModeratelySorted	2.0625	5453.07	653.159	5580.61	6698.25	5402.69	237.312	3006.25	0	480.796	4	52.505	36336	18086	17466	36956	70.4153	63.1362	5.11955	62.4678	4.45113	58.5005	195.633	41975.4	21060.3	0	2.6	6.77674
Pzh_00012	yes	UXO	small boxes with Flak ammunition	200.677	1.5	1	1.25	1.46	0.67	2	355.67	581.52	2	0.0306793	0.300605	FineSilt-ModeratelySorted	1.0625	5285.31	811.759	5483.43	6792.46	5134.24	17.9169	2745.47	0	416.701	4	49.9314	33300	14271	14636	32935	69.1847	61.316	3.89244	60.996	3.57242	57.8318	195.633	41975.4	21060.3	0	0	6.77674
Pzh_00014	no	0	0	64.2804							23.1409	30.951		0.0339654	0.286284	FineSilt-PoorlySorted	1.0625	3927.97	2567.83	4664.64	7947.73	3064.06	642.264	1576.97	0	1856.48	4	62.268	20582	2135	2022	20695	91.4913	84.8365	1.24935	88.9575	5.37031	84.4849	195.633	41975.4	21060.3	0	0	14.0504
Pzh_00015	no	0	0	44.3883							15.9798	18.8329		0.0337456	0.288877	FineSilt-PoorlySorted	1.0625	4072.74	2297.87	4727.72	7795.37	3344.48	837.013	1638.57	0	1585.79	4	57.7843	21321	2251	2751	20821	78.3816	84.8365	1.24935	88.9575	5.37031	84.4849	195.633	41975.4	21060.3	0	0	14.0504
Pzh_00016	no	0	0	65.9277							23.734	32.0199		0.0316592	0.296819	FineSilt-ModeratelySorted	1.0625	4938.7	943.402	5190.05	7092.25	4787.65	355.456	2551.97	0	554.478	4	42.487	28489	7684	9660	26513	69.1847	70.9943	1.61059	73.8034	4.41973	70.0121	195.633	41975.4	21060.3	0	0	6.77674
Pzh_00017	no	0	0	51.4528							18.523	22.9601		0.0316592	0.296819	FineSilt-ModeratelySorted	1.0625	4957.59	927.861	5204.34	7077.15	4809.95	333.601	2566.63	0	548.359	4	42.5982	28555	7682	9700	26537	69.1847	70.9943	1.61059	73.8034	4.41973	70.0121	195.633	41975.4	21060.3	0	0	6.77674
Pzh_00018	no	0	0	146.606							52.778	93.5621		0.0316179	0.296578	FineSilt-ModeratelySorted	1.0625	4829.46	809.723	5033.34	7244.16	4822.71	450.865	2710.36	0	752.093	4	39.8992	26825	5605	8009	24421	69.1847	70.9943	1.61059	73.8034	4.41973	70.0121	195.633	41975.4	21060.3	0	0	6.77674
Pzh_00019	no	0	0	121.35							43.6862	72.5997		0.032032	0.296322	FineSilt-ModeratelySorted	1.0625	4721.95	1133.8	5026.3	7269.13	4534.46	609.375	2398.54	0	680.542	4	43.8092	25885	4985	7045	23825	69.1847	70.9943	1.61059	73.8034	4.41973	70.0121	195.633	41975.4	21060.3	0	0	6.77674
Pzh_00020	no	0	0	32.2059							11.5941	12.2454		0.031952	0.297067	FineSilt-ModeratelySorted	1.0625	4828.89	1248.11	5172.7	7133.79	4510.09	607.206	2255.04	0	548.107	4	46.1923	27802	7206	8853	26155	69.1847	64.5544	2.2346	65.8051	3.48525	62.8328	195.633	41975.4	21060.3	0	0	6.77674
Pzh_00021	no	0	0	32.7517							11.7906	12.5246		0.031952	0.297067	FineSilt-ModeratelySorted	1.0625	4821.76	1244.64	5164.44	7141.74	4508.3	608.884	2259.69	0	555.571	4	46.1055	27802	7206	8853	26155	69.1847	64.5544	2.2346	65.8051	3.48525	62.8328	195.633	41975.4	21060.3	0	0	6.77674
Pzh_00024	no	0	0	29.4196							10.591	10.8454		0.0317624	0.305986	FineSilt-PoorlySorted	1.0625	6361.36	2251.53	4738.62	5538.45	5372.46	1504.03	2258.67	0	0	4	56.4294	68042	67670	50134	85578	80.2617	54.4569	10.7814	48.6221	4.94659	43.9169	195.633	41975.4	21060.3	0	0	12.6
Pzh_00025	no	0	0	42.8506							15.4262	17.9628		0.0317624	0.305986	FineSilt-PoorlySorted	1.0625	6369.73	2264.76	4730.71	5529.11	5373.83	1516.98	2255.82	0	0	4	56.2173	67968	67654	50132	85490	80.2617	54.4569	10.7814	48.6221	4.94659	43.9169	195.633	41975.4	21060.3	0	0	12.6
Pzh_00026	no	0	0	53.295							19.1862	24.0697		0.0317624	0.305986	FineSilt-PoorlySorted	1.0625	6377.48	2275.69	4723.32	5520.63	5376.06	1527.88	2254.59	0	0	4	56.1052	67968	67654	50132	85490	80.2617	54.4569	10.7814	48.6221	4.94659	43.9169	195.633	41975.4	21060.3	0	0	12.6
Pzh_00027	no	UXO	munition boxes	57.9812							20.8732	26.9512		0.0338733	0.289282	FineSilt-PoorlySorted	1.0625	4436.6	2834.91	5244.36	7474.78	3089.56	463.625	974.876	0	1856.73	4	56.4225	21720	2252	2934	21038	80.0959	75.8432	1.28694	78.9737	4.41739	75.4472	195.633	41975.4	21060.3	0	0	14.0504
Pzh_00028	no	0	0	401.911							144.688	362.024		0.0338733	0.290879	FineSilt-PoorlySorted	1.0625	4561.29	2902.18	5380.47	7360.24	3121.55	327.91	837.803	0	1859.15	4	55.5254	21798	2285	3114	20969	80.0959	75.8432	1.28694	78.9737	4.41739	75.4472	195.633	41975.4	21060.3	0	0	14.0504
Pzh_00029	no	0	0	54.7704							19.7174	24.968		0.0339798	0.292298	VeryFineSilt-PoorlySorted	1.0625	4658.37	3123.61	5701.14	7111.11	3176.77	34.2973	500.036	0	1913.33	4	52.6945	23809	3709	4846	22672	68.5315	66.8895	1.42703	69.3711	3.90861	66.2475	195.633	41975.4	21060.3	0	0	14.0504
Pzh_00030	no	0	0	35.0389							12.614	13.712		0.0339798	0.289754	VeryFineSilt-PoorlySorted	1.0625	4495.51	3242.05	5649.51	7224.3	3016.42	89.4384	525.712	0	2074.16	4	54.0286	22913	2836	3772	21977	68.5315	73.7847	1.26689	77.1653	4.64748	73.4436	195.633	41975.4	21060.3	0	0	14.0504
Pzh_00031	no	UXO	0	79.3744							28.5748	41.075		0.0336378	0.287479	VeryFineSand-PoorlySorted	1.0625	4210.99	3441.52	5547.75	7437.23	2734.25	371.251	687.392	0	2348.78	4	56.5353	21689	2241	2707	21223	80.0959	73.7847	1.26689	77.1653	4.64748	73.4436	195.633	41975.4	21060.3	0	0	14.0504
Pzh_00032	yes	UXO	Sprengranaten?, Panzerfäuste?, mixed munition	316.551	1.75	1	1.5	1.28	0.94	1.75	230.33	376.59	3.25	0.0315962	0.262565	MediumSilt-ModeratelySorted	4.0625	2563.34	2180.52	4395.22	9300.19	1049.78	5.07967	2600.28	0	3901.19	4	97.9284	17406	1783	384	18805	94.9018	95.5008	1.78664	103.172	9.45833	94.243	88.5	18086.4	9059.64	0	2.45	14.0504
Pzh_00033	no	UXO	0	21.5797							7.76869	7.15591		0.0338679	0.28654	VeryFineSand-PoorlySorted	1.0625	4149.38	3383.92	5382.88	7585.06	2655.95	467.593	841.724	0	2368.53	4	58.4685	21182	2122	2325	20979	80.0959	83.3068	1.20332	87.373	5.26943	83.1036	195.633	41975.4	21060.3	0	0	14.0504
Pzh_00034	no	UXO	0	440.032							158.411	408.826		0.0338679	0.284872	VeryFineSand-PoorlySorted	1.0625	4132.08	3422.43	5414.42	7571.42	2642.89	469.965	823.646	0	2394.92	4	58.4856	21198	2117	2242	21073	80.0959	83.3068	1.20332	87.373	5.26943	83.1036	195.633	41975.4	21060.3	0	0	14.0504
Pzh_00035	yes	UXO	boxes, handgrenades	338.583	1.67	1	1.88	1.03	0.5	1.88	488	797.88	1.75	0.0339798	0.292298	VeryFineSilt-PoorlySorted	1.0625	4596.95	3183.36	5699.86	7140.45	3118.4	20.1039	483.709	0	1979.64	4	53.0915	23836	3703	4702	22837	68.5315	66.8895	1.42703	69.3711	3.90861	66.2475	195.633	41975.4	21060.3	0	0	14.0504
Pzh_00036	no	0	0	45.4735							16.3705	19.4532		0.0320388	0.301541	FineSilt-PoorlySorted	1.0625	5290.29	1520.13	5689.93	6634.39	4676.33	704.305	2046.24	0	233.671	4	51.9194	33427	15494	14852	34069	72.9756	58.7989	3.00363	58.7218	2.92655	56.1906	195.633	41975.4	21060.3	0	0	6.77674
Pzh_00037	yes	UXO	bombs	354.412	2	1	2.5	0.94	0.66	2	202	330.27	3.75	0.0343885	0.279013	FineSilt-PoorlySorted	1.0625	3298.53	2876.15	4102.67	8583.15	2698.25	19.4886	2074.12	0	2391.02	4	73.4517	18560	2026	867	19719	91.4913	97.6809	1.51929	103.978	7.81687	96.924	195.633	41975.4	21060.3	0	0	14.0504
Pzh_00038	no	0	0	32.9384							11.8578	12.6205		0.0317415	0.30012	FineSilt-ModeratelySorted	1.0625	5204.28	1208.29	5523.4	6771.65	4807.33	403.694	2325.27	0	184.085	4	49.2827	32384	13096	13565	31915	72.9756	64.5544	2.2346	65.8051	3.48525	62.8328	195.633	41975.4	21060.3	0	0	6.77674
Pzh_00039	no	0	0	32.9664							11.8679	12.6349		0.0317415	0.30012	FineSilt-ModeratelySorted	1.0625	5194.68	1201.97	5512.71	6782.12	4803.46	399.976	2328.56	0	194.946	4	49.0547	32267	13081	13484	31864	72.9756	64.5544	2.2346	65.8051	3.48525	62.8328	195.633	41975.4	21060.3	0	0	6.77674
Pzh_00041	no	0	0	31.7344							11.4244	12.0055		0.0317415	0.30012	FineSilt-ModeratelySorted	1.0625	5165.04	1243.38	5496.96	6802.26	4751.8	449.394	2279.23	0	212.456	4	48.5919	31834	12692	13096	31430	72.9756	64.5544	2.2346	65.8051	3.48525	62.8328	195.633	41975.4	21060.3	0	0	6.77674
Pzh_00045	no	0	0	48.6843							17.5263	21.3179		0.0317415	0.301993	FineSilt-ModeratelySorted	1.0625	5283.35	1188.73	5590.3	6700.83	4888.3	368.296	2373.23	0	135.871	4	51.4938	34849	16171	15828	35192	72.9756	64.5544	2.2346	65.8051	3.48525	62.8328	195.633	41975.4	21060.3	0	0	6.77674
Pzh_00046	no	0	0	140.799							50.6876	88.624		0.0338733	0.291808	FineSilt-PoorlySorted	1.0625	4637.87	2774.53	5420	7265.82	3273.52	387.409	867.14	0	1704.78	4	54.2489	23330	3232	4414	22148	80.0959	75.8432	1.28694	78.9737	4.41739	75.4472	195.633	41975.4	21060.3	0	0	14.0504
Pzh_00047	no	0	0	21.5837							7.77015	7.15771		0.0319226	0.298615	FineSilt-ModeratelySorted	1.0625	5061.98	1407.81	5447.06	6873.01	4560.82	641.028	2094.99	0	347.45	4	49.5392	29774	9590	10939	28425	72.9756	64.5544	2.2346	65.8051	3.48525	62.8328	195.633	41975.4	21060.3	0	0	6.77674
Pzh_00048	no	0	0	24.8489							8.9456	8.64688		0.0319226	0.300951	FineSilt-ModeratelySorted	1.0625	5163.86	1400.99	5540.63	6774.88	4646.52	605.985	2122.61	0	251.589	4	50.2061	31948	13187	13319	31816	72.9756	64.5544	2.2346	65.8051	3.48525	62.8328	195.633	41975.4	21060.3	0	0	6.77674
Pzh_00049	no	0	0	57.4504							20.6822	26.6207		0.0312913	0.30286	FineSilt-ModeratelySorted	1.0625	5341.68	1220.67	5651.97	6639.57	4920.14	396.092	2367.5	0	80.3437	4	53.205	35292	16630	16252	35670	72.9756	61.316	3.89244	60.996	3.57242	57.8318	195.633	41975.4	21060.3	0	0	6.77674
Pzh_00051	no	0	0	29.3866							10.5792	10.8291		0.0317971	0.30286	FineSilt-ModeratelySorted	1.0625	5412.34	1226.84	5692.82	6572.98	4982.69	404.606	2398.19	0	39.2898	4	55.648	36815	19177	17767	38225	72.9756	61.316	3.89244	60.996	3.57242	57.8318	195.633	41975.4	21060.3	0	0	6.77674
Pzh_00052	no	0	0	174.611							62.8601	118.295		0.0307471	0.30441	FineSilt-ModeratelySorted	2.0625	5542.15	1033.01	5585.91	6505.16	5242.52	298.388	2680.53	0	134.805	4	61.55	40066	24450	21477	43039	72.9756	61.316	3.89244	60.996	3.57242	57.8318	195.633	41975.4	21060.3	0	0	6.77674
Pzh_00053	no	0	0	32.6883							11.7678	12.4921		0.0306395	0.305619	FineSilt-ModeratelySorted	2.0625	5718.47	978.891	5431.85	6379.47	5483.21	420.282	2900.09	0	143.143	4	68.244	45489	33612	26771	52330	88.1112	61.0889	7.31566	57.7163	3.94311	54.1127	195.633	41975.4	21060.3	0	2.6	6.77674
Pzh_00054	no	0	0	25.4255							9.15317	8.91714		0.0337161	0.281877	FineSand-PoorlySorted	1.0625	3555.55	3511.87	5843.5	7627.04	2190.55	1174.03	1188.23	0	3157.69	4	62.0671	20101	1936	1459	20578	79.5914	90.1052	1.23628	94.4065	5.53759	89.9393	88.5	18086.4	9059.64	0	0	14.0504
Pzh_00055	no	0	0	355.588							128.012	307.172		0.0331537	0.301607	FineSilt-ModeratelySorted	1.0625	5713.99	3669.18	5118.61	5663.66	4351	785.886	1093.82	0	1315.12	4	39.4046	53338	47989	35219	66108	71.3886	50.5319	3.08585	50.7506	3.30456	47.8865	195.633	41975.4	21060.3	0	0	12.6
Pzh_00056	no	0	0	26.4277							9.51398	9.39191		0.0319318	0.307236	FineSilt-PoorlySorted	1.0625	7034.47	3010.77	4097.57	4839.12	5736.09	2268.75	2460.84	0	17.7704	4	88.1601	101249	120828	84727	137350	195.428	58.7156	17.0325	50.5829	8.89972	41.9984	195.633	41975.4	21060.3	0	0	12.6
Pzh_00057	no	0	0	25.5462							9.19662	8.97398		0.0334994	0.298649	FineSilt-ModeratelySorted	1.0625	5512.3	3927.23	5225.59	5727.41	4187.38	529.53	1040.61	0	1617.42	4	39.8672	50284	43060	31819	61525	71.3886	49.3363	3.23257	50.1545	4.05078	46.5242	195.633	41975.4	21060.3	0	0	12.6
Pzh_00058	no	0	0	137.698							49.5712	86.0151		0.0334994	0.298649	FineSilt-ModeratelySorted	1.0625	5506.73	3949.31	5223.89	5722.54	4185.35	508.514	1049.53	0	1635.13	4	39.8832	50387	43068	31835	61620	71.3886	49.3363	3.23257	50.1545	4.05078	46.5242	195.633	41975.4	21060.3	0	0	12.6
Pzh_00059	no	0	0	55.2662							19.8958	25.2717		0.0334994	0.298649	FineSilt-ModeratelySorted	1.0625	5493.81	3950.45	5236.18	5734.12	4172.57	510.148	1039.34	0	1645.19	4	39.9309	50460	43091	31837	61714	71.3886	49.3363	3.23257	50.1545	4.05078	46.5242	195.633	41975.4	21060.3	0	0	12.6
Pzh_00060	no	0	0	153.385							55.2185	99.4124		0.0338738	0.296224	VeryFineSilt-PoorlySorted	1.0625	5118.29	4229.42	5524.03	5970.76	3844.21	522.274	977.786	0	2085.26	4	41.1664	38101	23960	19365	42696	60.2192	50.8924	2.12241	53.3414	4.57144	49.256	195.633	41975.4	21060.3	0	0	14.0504
Pzh_00061	no	0	0	28.1721							10.142	10.2329		0.0340515	0.296224	VeryFineSilt-PoorlySorted	1.0625	4957.93	4215.69	5689.32	6133.45	3679.03	682.027	874.531	0	2188.68	4	41.989	35521	19971	16651	38841	60.2192	56.7564	1.61944	59.5435	4.40648	55.7691	195.633	41975.4	21060.3	0	0	14.0504
Pzh_00062	no	0	0	77.2859							27.8229	39.6315		0.0343961	0.292231	VeryFineSilt-PoorlySorted	1.0625	4580.91	4562.55	5963.89	6341.46	3390.52	995.447	1172.42	0	2708.48	4	43.7142	27911	9415	9148	28178	60.2192	53.9339	1.53567	57.4432	5.04494	52.98	88.5	18086.4	9059.64	0	0	14.0504
Pzh_00063	no	0	0	32.4173							11.6702	12.3534		0.0343681	0.292231	VeryFineSilt-PoorlySorted	1.0625	4472.39	4453.77	6093.02	6480.36	3259.86	1099.34	1074.95	0	2728.31	4	45.1448	26494	7605	7750	26349	63.1012	61.9593	1.35686	65.4564	4.85394	61.3566	88.5	18086.4	9059.64	0	0	14.0504
Pzh_00064	no	0	0	91.0661							32.7838	49.3907		0.0343597	0.290584	VeryFineSilt-PoorlySorted	1.0625	4353.08	4335.16	6156.84	6504.12	3210.29	1247.38	1344.47	0	2982.47	4	45.3103	27332	8768	8240	27860	63.1012	53.9339	1.53567	57.4432	5.04494	52.98	88.5	18086.4	9059.64	0	0	14.0504
Pzh_00065	no	0	0	241.848							87.0654	183.137		0.0341654	0.286106	VeryFineSilt-PoorlySorted	1.0625	3886.34	3868.72	6600.94	6918.85	2792.76	1723.51	1565.46	0	3399.57	4	49.5023	21775	2480	2948	21307	63.1012	68.7367	1.24231	72.4535	4.9591	68.3647	88.5	18086.4	9059.64	0	0	14.0504
Pzh_00066	yes	UXO	large boxes with disc	21.6178	1.25	1	1.75	0.86	0.83	2	9.33	15.2546	1.75	0.0301785	0.306074	FineSilt-ModeratelySorted	2.0625	5801.75	867.899	5382.66	6362.22	5673.08	530.42	3124.66	0	251.633	4	67.2793	44536	32709	26220	51025	88.1112	61.0889	7.31566	57.7163	3.94311	54.1127	690.8	149101	139112	0	2.6	6.77674
Pzh_00067	no	0	0	32.9186							11.8507	12.6104		0.0307471	0.30441	FineSilt-ModeratelySorted	2.0625	5495.14	959.315	5639.56	6566	5242.06	232.076	2721.26	0	210.751	4	59.1273	39509	23919	20931	42497	72.9756	61.316	3.89244	60.996	3.57242	57.8318	195.633	41975.4	21060.3	0	0	6.77674
Pzh_00069	no	0	0	78.4718							28.2498	40.4495		0.0320388	0.300951	FineSilt-ModeratelySorted	1.0625	5185.34	1419	5565.61	6751.15	4652.41	619.154	2110.63	0	243.499	4	50.5467	31948	13187	13319	31816	72.9756	64.5544	2.2346	65.8051	3.48525	62.8328	195.633	41975.4	21060.3	0	0	6.77674
Pzh_00070	no	0	0	89.7636							32.3149	48.4452		0.0320388	0.300951	FineSilt-ModeratelySorted	1.0625	5177.27	1405.04	5554.21	6761.24	4654.95	606.922	2122.23	0	241.951	4	50.3551	31948	13187	13319	31816	72.9756	64.5544	2.2346	65.8051	3.48525	62.8328	195.633	41975.4	21060.3	0	0	6.77674
Pzh_00071	no	0	0	30.5088							10.9832	11.3875		0.0320388	0.300951	FineSilt-ModeratelySorted	1.0625	5161.44	1436.63	5548.46	6771.43	4620.82	642.149	2086.52	0	275.075	4	50.5131	32244	13219	13327	32136	72.9756	64.5544	2.2346	65.8051	3.48525	62.8328	195.633	41975.4	21060.3	0	0	6.77674
Pzh_00072	no	0	0	89.592							32.2531	48.321		0.0320388	0.299562	FineSilt-ModeratelySorted	1.0625	5154.4	1457.27	5547.75	6775.03	4601.27	664.394	2064.16	0	294.543	4	50.6417	32281	13226	13327	32180	72.9756	64.5544	2.2346	65.8051	3.48525	62.8328	195.633	41975.4	21060.3	0	0	6.77674
Pzh_00073	no	0	0	98.9068							35.6065	55.1787		0.0320388	0.300951	FineSilt-ModeratelySorted	1.0625	5195.53	1433.3	5579.05	6738.99	4651.49	631.396	2099.4	0	244.482	4	50.7509	31948	13187	13319	31816	72.9756	64.5544	2.2346	65.8051	3.48525	62.8328	195.633	41975.4	21060.3	0	0	6.77674
Pzh_00074	no	UXO	0	28.5891							10.2921	10.4366		0.033799	0.282381	VeryFineSand-PoorlySorted	1.0625	3735.07	3488.72	5043.63	8049.01	2221.07	945.641	1298.02	0	2722.18	4	66.5387	19310	1954	1019	20245	94.1377	90.8428	1.19717	95.6339	5.98834	90.6922	88.5	18086.4	9059.64	0	0	14.0504
Pzh_00075	no	UXO	0	21.8968							7.88285	7.29735		0.033799	0.282381	VeryFineSand-PoorlySorted	1.0625	3724.81	3480.75	5050.51	8049.55	2211.59	950.192	1298.68	0	2733.94	4	66.6764	19310	1954	1019	20245	94.1377	90.8428	1.19717	95.6339	5.98834	90.6922	88.5	18086.4	9059.64	0	0	14.0504
Pzh_00076	no	0	0	47.5191							17.1069	20.6362		0.0303638	0.305619	FineSilt-ModeratelySorted	2.0625	5736.22	909.849	5429.44	6391.86	5557.49	442.001	3000.18	0	209.664	4	67.2055	43370	30496	24792	49074	88.1112	61.0889	7.31566	57.7163	3.94311	54.1127	195.633	41975.4	21060.3	0	2.6	6.77674
Pzh_00077	no	0	0	112.077							40.3477	65.2547		0.0306395	0.305619	FineSilt-ModeratelySorted	2.0625	5663	918.427	5491.73	6442.51	5459.21	363.69	2910.17	0	205.512	4	65.0839	43418	30507	24793	49132	88.1112	61.0889	7.31566	57.7163	3.94311	54.1127	195.633	41975.4	21060.3	0	2.6	6.77674
Pzh_00078	no	0	0	24.1431							8.69153	8.31899		0.0307471	0.303676	FineSilt-ModeratelySorted	1.0625	5502.09	1119.98	5614.53	6517.02	5142.45	331.609	2562.15	0	80.142	4	59.9067	39365	24122	20863	42624	72.9756	61.316	3.89244	60.996	3.57242	57.8318	195.633	41975.4	21060.3	0	0	6.77674
Pzh_00079	no	0	0	22.4393							8.07814	7.54092		0.0312913	0.303676	FineSilt-ModeratelySorted	1.0625	5466.67	1155.74	5645.38	6539.79	5082.83	348.668	2502.33	0	67.3626	4	58.2856	39054	23066	20178	41942	72.9756	61.316	3.89244	60.996	3.57242	57.8318	195.633	41975.4	21060.3	0	0	6.77674
Pzh_00080	no	0	0	26.5512							9.55844	9.45084		0.0317971	0.30286	FineSilt-ModeratelySorted	1.0625	5418.52	1226.37	5686.81	6567.42	4988.96	404.78	2402.16	0	36.5964	4	55.8829	37269	19662	18181	38750	72.9756	61.316	3.89244	60.996	3.57242	57.8318	195.633	41975.4	21060.3	0	0	6.77674
Pzh_00084	no	0	0	69.7506							25.1102	34.5354		0.031975	0.30286	FineSilt-ModeratelySorted	1.0625	5330.56	1325.01	5671.54	6629.12	4841.51	502.072	2258.4	0	54.55	4	52.0148	34691	16194	15833	35052	72.9756	64.5544	2.2346	65.8051	3.48525	62.8328	195.633	41975.4	21060.3	0	0	6.77674
Pzh_00086	no	0	0	21.8067							7.85042	7.2571		0.031975	0.30286	FineSilt-ModeratelySorted	1.0625	5351.56	1313.99	5687.25	6611.51	4868.08	489.772	2279.3	0	28.0844	4	52.6993	35176	16607	16277	35506	72.9756	64.5544	2.2346	65.8051	3.48525	62.8328	195.633	41975.4	21060.3	0	0	6.77674
Pzh_00087	no	0	0	21.5659							7.76372	7.14976		0.0312913	0.30286	FineSilt-ModeratelySorted	1.0625	5408.46	1224.87	5696.75	6576.97	4980.25	402.329	2397.98	0	42.6738	4	55.5213	36815	19177	17767	38225	72.9756	61.316	3.89244	60.996	3.57242	57.8318	195.633	41975.4	21060.3	0	0	6.77674
Pzh_00088	no	0	0	37.0786							13.3483	14.7934		0.0317971	0.30286	FineSilt-ModeratelySorted	1.0625	5413.03	1249.31	5690.68	6567.55	4968.59	426.487	2376.07	0	22.3597	4	55.4577	37171	19657	18125	38703	72.9756	61.316	3.89244	60.996	3.57242	57.8318	195.633	41975.4	21060.3	0	0	6.77674
Pzh_00091	no	0	0	31.2299							11.2428	11.7501		0.031975	0.30286	FineSilt-ModeratelySorted	1.0625	5370.82	1311.7	5703.8	6593.96	4887.52	486.964	2291.12	0	8.44882	4	53.3067	35591	17085	16690	35986	72.9756	64.5544	2.2346	65.8051	3.48525	62.8328	195.633	41975.4	21060.3	0	0	6.77674
Pzh_00092	no	0	0	20.2905							7.30456	6.58824		0.031975	0.30286	FineSilt-ModeratelySorted	1.0625	5389.04	1314.94	5710.63	6576.36	4902.55	490.185	2297.31	0	0	4	53.845	35591	17085	16690	35986	72.9756	64.5544	2.2346	65.8051	3.48525	62.8328	195.633	41975.4	21060.3	0	0	6.77674
Pzh_00093	no	0	0	24.5506							8.83821	8.5079		0.0317971	0.30286	FineSilt-ModeratelySorted	1.0625	5381	1280.3	5703.97	6590.73	4917.72	455.564	2327.72	0	16.0984	4	54.0007	35534	17081	16664	35951	72.9756	61.316	3.89244	60.996	3.57242	57.8318	195.633	41975.4	21060.3	0	0	6.77674
Pzh_00095	no	0	0	20.0017							7.20059	6.46273		0.031975	0.30286	FineSilt-ModeratelySorted	1.0625	5397.38	1315.35	5702.38	6568.52	4910.2	490.736	2301.34	0	0	4	54.1113	35591	17085	16690	35986	72.9756	64.5544	2.2346	65.8051	3.48525	62.8328	195.633	41975.4	21060.3	0	0	6.77674
Pzh_00096	no	0	0	62.4113							22.4681	29.7496		0.0317971	0.30286	FineSilt-ModeratelySorted	1.0625	5400.19	1255.69	5702.88	6578.03	4952.09	431.854	2362.56	0	24.131	4	54.9283	35534	17081	16664	35951	72.9756	61.316	3.89244	60.996	3.57242	57.8318	195.633	41975.4	21060.3	0	0	6.77674
Pzh_00097	no	0	0	41.0741							14.7867	16.9707		0.0317971	0.30286	FineSilt-ModeratelySorted	1.0625	5392.02	1269.66	5710.08	6582.68	4935.13	445.268	2344.17	0	18.0994	4	54.4932	35534	17081	16664	35951	72.9756	61.316	3.89244	60.996	3.57242	57.8318	195.633	41975.4	21060.3	0	0	6.77674
Pzh_00098	no	0	0	29.3042							10.5495	10.7884		0.0317971	0.30286	FineSilt-ModeratelySorted	1.0625	5385.99	1274.41	5706.72	6587.29	4926.3	449.791	2336.23	0	17.7731	4	54.2342	35534	17081	16664	35951	72.9756	61.316	3.89244	60.996	3.57242	57.8318	195.633	41975.4	21060.3	0	0	6.77674
Pzh_00099	no	0	0	62.4357							22.4769	29.7652		0.0317971	0.30286	FineSilt-ModeratelySorted	1.0625	5397.48	1292.43	5703.45	6572.99	4925.36	468	2324.33	0	0	4	54.4145	35591	17085	16690	35986	72.9756	61.316	3.89244	60.996	3.57242	57.8318	195.633	41975.4	21060.3	0	0	6.77674
Pzh_00100	no	0	0	65.625							23.625	31.8228		0.0317971	0.30286	FineSilt-ModeratelySorted	1.0625	5398.28	1303.39	5702.09	6570.06	4918.93	478.881	2313.8	0	0	4	54.3009	35591	17085	16690	35986	72.9756	61.316	3.89244	60.996	3.57242	57.8318	195.633	41975.4	21060.3	0	0	6.77674
Pzh_00101	no	0	0	20.9989							7.5596	6.89869		0.0320388	0.300306	FineSilt-PoorlySorted	1.0625	5214.95	1631.74	5652.35	6691.96	4535.79	828.514	1907.2	0	379.498	4	52.0719	33891	15557	14807	34641	72.9756	58.7989	3.00363	58.7218	2.92655	56.1906	195.633	41975.4	21060.3	0	0	6.77674
Pzh_00102	no	0	0	206.45							74.322	148.103		0.0331119	0.294913	FineSilt-PoorlySorted	1.0625	4876.29	2119.74	5471.16	6992.56	3928.22	1036.74	1378.22	0	1003.76	4	51.8501	27262	7031	8215	26078	71.0605	68.7531	1.45925	70.8995	3.6057	68.0226	195.633	41975.4	21060.3	0	0	6.77674
Pzh_00103	no	0	0	91.3362							32.881	49.5873		0.0338179	0.297023	VeryFineSilt-PoorlySorted	1.0625	5098.53	4877.69	5402.76	5759.38	3960.82	631.334	1558.87	0	2581.63	4	38.5576	44405	35272	25904	53773	59.699	47.1779	3.2545	48.7069	4.78345	44.2566	195.633	41975.4	21060.3	0	0	14.0504
Pzh_00104	no	0	0	62.2608							22.4139	29.6533		0.0338179	0.297023	VeryFineSilt-PoorlySorted	1.0625	5086.51	4882.35	5413.93	5769.53	3950.15	643.18	1558.55	0	2592.04	4	38.6166	44473	35273	25905	53841	59.699	47.1779	3.2545	48.7069	4.78345	44.2566	195.633	41975.4	21060.3	0	0	14.0504
Pzh_00105	no	0	0	1148.66							413.518	1481.28		0.0342334	0.2941	VeryFineSilt-PoorlySorted	1.625	5068.98	4524.34	5373.48	5638.98	4086.64	1193.36	2141.3	0	3163.63	4	34.5353	44877	36446	26716	54607	50.8197	44.0174	3.02202	46.4632	5.46786	41.2203	88.5	18086.4	9059.64	0	0	12.458
Pzh_00106	no	0	0	27.5869							9.93129	9.94873		0.0346841	0.287301	FineSilt-ModeratelySorted	1.625	5253.85	3970.47	5207.26	5386.21	4424.55	1765.57	2774.49	0	3708.23	4	31.3307	47599	41409	30066	58942	49.4061	40.4084	2.50492	43.8014	5.89786	38.0471	88.5	18086.4	9059.64	0	0	12.458
Pzh_00107	yes	UXO	V1 Gefechtsköpfe	63.5414	1	1	2.75	1.36	1.08	2.13	15.5	25.3425	0.88	0.0349343	0.282729	FineSilt-ModeratelySorted	1.625	5258.59	3771.08	5245.48	5373.99	4523.63	2116.85	3090.41	0	4056.86	4	28.8873	48199	42509	30786	59922	49.4061	40.4084	2.50492	43.8014	5.89786	38.0471	88.5	18086.4	9059.64	0	0	12.458
Pzh_00108	yes	UXO	V1 Gefechtsköpfe	23.3844	1	1	2.75	1.2	1.09	1.63	3	4.905	0.75	0.0349343	0.282729	FineSilt-ModeratelySorted	1.625	5263.71	3763	5241.57	5368.96	4530.56	2124.43	3099.27	0	4063.83	4	28.8039	48212	42513	30787	59938	49.4061	40.4084	2.50492	43.8014	5.89786	38.0471	88.5	18086.4	9059.64	0	0	12.458
Pzh_00109	yes	0	0	33.1571	0.75	1	3.5	1.45	1.2	2	7.67	12.5404	0.5	0.0363405	0.284325	FineSilt-PoorlySorted	1.625	5737.92	3370.62	4769.92	4894.55	4983.21	2180.49	3325.64	0	4038.21	4	28.8877	68504	76255	52475	92284	49.4061	38.5124	4.39448	41.0925	6.97449	34.1826	88.5	18086.4	9059.64	0	0	12.458
Pzh_00111	no	UXO	long grenades sticking in the ground	32.8312							11.8192	12.5654		0.0339905	0.287298	FineSilt-PoorlySorted	1.0625	4207.98	2920.04	5046.71	7713.43	2885.55	633.675	1136.02	0	2029.06	4	58.4738	20874	2103	2188	20789	80.0959	91.7862	1.27295	96.8595	6.34623	91.4563	195.633	41975.4	21060.3	0	0	14.0504
Pzh_00112	no	0	0	31.504							11.3415	11.8887		0.0337869	0.290634	VeryFineSilt-PoorlySorted	1.0625	4602.6	3310.5	5853.22	7030.16	3143	154.345	322.828	0	2023.47	4	51.839	24049	3684	4879	22854	68.5315	73.7847	1.26689	77.1653	4.64748	73.4436	195.633	41975.4	21060.3	0	0	14.0504
Pzh_00113	no	0	0	23.6905							8.52858	8.11041		0.0338273	0.292728	VeryFineSilt-PoorlySorted	1.0625	4581.7	3667.46	6206.87	6807.43	3180.35	559.609	189.131	0	2187.88	4	50.3861	24989	5062	6075	23976	68.5315	64.5612	1.40605	67.5555	4.4003	63.9369	195.633	41975.4	21060.3	0	0	14.0504
Pzh_00114	no	0	0	37.7877							13.6036	15.1742		0.0338273	0.292728	VeryFineSilt-PoorlySorted	1.0625	4605.92	3652.63	6215.05	6789.42	3203.62	557.617	168.278	0	2164.05	4	50.3221	25072	5054	6128	23998	68.5315	64.5612	1.40605	67.5555	4.4003	63.9369	195.633	41975.4	21060.3	0	0	14.0504
Pzh_00115	no	0	0	136.586							49.1709	85.0844		0.0345089	0.297819	FineSilt-ModeratelySorted	1.625	5881.83	4681.45	4626.28	5005.85	4730.23	559.318	2005.6	0	2264.97	4	37.1655	75805	85560	58471	102894	59.699	49.0732	9.43708	45.2052	5.56916	39.8264	195.633	41975.4	21060.3	0	0	12.458
Pzh_00116	no	0	0	41.8107							15.0519	17.3803		0.0342334	0.2941	VeryFineSilt-PoorlySorted	1.625	5160.01	4426.84	5281.25	5540.87	4187.38	1215.87	2222.28	0	3180.06	4	34.3287	44586	36418	26711	54293	50.8197	44.0174	3.02202	46.4632	5.46786	41.2203	88.5	18086.4	9059.64	0	0	12.458
Pzh_00117	no	0	0	98.39							35.4204	54.7922		0.03283	0.300281	FineSilt-ModeratelySorted	1.625	5748.49	4671.54	4803.62	5215.43	4549.39	268.77	1721.65	0	2062.41	4	38.258	69868	75966	52483	93351	59.699	48.0532	5.47417	47.1021	4.52304	42.886	195.633	41975.4	21060.3	0	0	12.6
Pzh_00118	no	0	0	23.9346							8.61645	8.22271		0.0335489	0.293961	FineSilt-PoorlySorted	1.0625	4651.76	2347.16	5319.08	7218.67	3603.51	796.703	1217.26	0	1322.64	4	52.7404	23993	3520	4998	22515	71.0605	68.7531	1.45925	70.8995	3.6057	68.0226	195.633	41975.4	21060.3	0	0	14.0504
Pzh_00119	no	0	0	86.1424							31.0113	45.8413		0.0344373	0.27988	MediumSilt-ModeratelySorted	1.0625	3624.62	3321.62	4765.06	8319.94	2095.41	904.57	1571.41	0	2802.58	4	73.1266	18885	1925	843	19967	94.1377	97.5417	1.33698	103.398	7.19349	97.1326	88.5	18086.4	9059.64	0	0	14.0504
Pzh_00120	no	0	0	255.587							92.0113	197.229		0.0344373	0.279907	MediumSilt-ModeratelySorted	1.0625	3619.46	3331.15	4828.08	8274.25	2092.83	961.772	1523.85	0	2810.75	4	71.8727	19051	1946	909	20088	94.1377	97.5417	1.33698	103.398	7.19349	97.1326	88.5	18086.4	9059.64	0	0	14.0504
Pzh_00121	no	0	0	146.839							52.8622	93.7624		0.0344373	0.279907	MediumSilt-ModeratelySorted	1.0625	3557.21	3273.96	4834.9	8303.75	2031.38	1006.97	1552.81	0	2873.88	4	72.8565	18952	1942	808	20086	94.1377	97.5417	1.33698	103.398	7.19349	97.1326	88.5	18086.4	9059.64	0	0	14.0504
Pzh_00122	yes	UXO	0	305.984	1.5	1	3	1.41	0.88	2.25	229	374.415	3	0.0344559	0.279907	MediumSilt-ModeratelySorted	1.0625	3418.84	3140.68	4824.87	8390.77	1893.47	979.096	1644.26	0	3012.22	4	75.2502	19068	1949	759	20258	94.1377	101.482	1.43235	107.83	7.78031	100.918	88.5	18086.4	9059.64	0	0	14.0504
Pzh_00123	no	0	0	135.553							48.7991	84.2224		0.0344559	0.279907	MediumSilt-ModeratelySorted	1.0625	3469.2	3189.91	4831.28	8356.66	1943.83	1024.68	1607.87	0	2962.12	4	74.3831	18977	1939	754	20162	94.1377	97.5417	1.33698	103.398	7.19349	97.1326	88.5	18086.4	9059.64	0	0	14.0504
Pzh_00124	no	0	0	141.022							50.7679	88.8124		0.0335956	0.287417	FineSilt-PoorlySorted	1.0625	3930.31	2124.88	4516.51	7944.24	3460.28	814.503	1913.84	0	1571.16	4	57.6045	20938	2163	2402	20699	78.3816	85.567	1.21856	90.0228	5.67435	85.1231	195.633	41975.4	21060.3	0	0	6.77674
Pzh_00125	no	0	0	74.7364							26.9051	37.8874		0.0344559	0.279907	MediumSilt-ModeratelySorted	1.0625	3492.96	3212.37	4831.19	8343.06	1967.42	1044.92	1593.37	0	2938.22	4	74.0144	19022	1946	756	20212	94.1377	97.5417	1.33698	103.398	7.19349	97.1326	88.5	18086.4	9059.64	0	0	14.0504
Pzh_00126	yes	UXO	0	73.4274	0.75	1	3.25	1.37	0.64	2.25	29.33	47.9545	2.25	0.0344559	0.278464	MediumSilt-ModeratelySorted	1.0625	3466.21	3182.35	4811.53	8373.4	1939.82	1013.45	1624.08	0	2963.72	4	74.8763	19022	1946	756	20212	94.1377	97.5417	1.33698	103.398	7.19349	97.1326	88.5	18086.4	9059.64	0	0	14.0504
Pzh_00127	yes	UXO	V1	33.4942	0.5	1	3.25	1.4	0.74	2	27	44.145	1.75	0.0344559	0.278464	MediumSilt-ModeratelySorted	1.0625	3461.03	3173.02	4793.13	8390.44	1933.76	1001.06	1640.77	0	2967.84	4	75.3844	18913	1933	748	20098	94.1377	97.5417	1.33698	103.398	7.19349	97.1326	88.5	18086.4	9059.64	0	0	14.0504
Pzh_00128	no	0	0	47.7485							17.1895	20.77		0.0344501	0.275988	MediumSilt-ModeratelySorted	1.0625	3250.78	2963.28	4754.8	8544.59	1722.61	803.523	1805.97	0	3176.83	4	78.5328	18591	1889	631	19849	94.1377	101.482	1.43235	107.83	7.78031	100.918	88.5	18086.4	9059.64	0	0	14.0504
Pzh_00129	no	0	0	148.927							53.6138	95.5555		0.0340238	0.288263	FineSilt-PoorlySorted	1.0625	4417.41	2968.12	5260.9	7514.42	2972.25	419.85	925.729	0	1986.75	4	57.0349	21669	2224	2829	21064	80.0959	75.8432	1.28694	78.9737	4.41739	75.4472	195.633	41975.4	21060.3	0	0	14.0504
Pzh_00130	no	UXO	V1, open TNT	162.39							58.4603	107.32		0.0339905	0.287298	FineSilt-PoorlySorted	1.0625	4229.8	2968.52	5080.87	7699.96	2857.77	600.589	1097.65	0	2065.04	4	58.2098	20814	2099	2178	20735	80.0959	83.3068	1.20332	87.373	5.26943	83.1036	195.633	41975.4	21060.3	0	0	14.0504
Pzh_00131	no	0	0	29.0844							10.4704	10.68		0.0341354	0.285411	FineSilt-ModeratelySorted	1.0625	4112.23	3135.36	5011.51	7846.74	2654.93	709.914	1170.46	0	2262.79	4	59.7682	20230	2050	1729	20551	80.0959	91.7862	1.27295	96.8595	6.34623	91.4563	195.633	41975.4	21060.3	0	0	14.0504
Pzh_00132	no	0	0	54.7096							19.6955	24.9308		0.034374	0.28299	MediumSilt-ModeratelySorted	1.0625	3848	3396.45	4866.92	8122.17	2321.33	872.598	1387.7	0	2583.08	4	66.7829	19641	1991	1236	20396	80.0959	97.5417	1.33698	103.398	7.19349	97.1326	88.5	18086.4	9059.64	0	0	14.0504
Pzh_00133	no	UXO	munition boxes, grenades	147.485							53.0947	94.3162		0.0342668	0.285411	FineSilt-ModeratelySorted	1.0625	3942.46	3166.43	4854.73	8017.99	2546.14	776.652	1335.71	0	2353.11	4	63.12	19675	2000	1356	20319	80.0959	91.7862	1.27295	96.8595	6.34623	91.4563	195.633	41975.4	21060.3	0	0	14.0504
Pzh_00134	no	0	0	175.67							63.2413	119.258		0.0342668	0.28427	FineSilt-ModeratelySorted	1.0625	3912.95	3098.29	4806.98	8032.32	2593.39	716.393	1374.67	0	2302.85	4	63.2778	19755	2009	1424	20340	80.0959	91.7862	1.27295	96.8595	6.34623	91.4563	195.633	41975.4	21060.3	0	0	14.0504
Pzh_00135	no	UXO	munition boxes, grenades	151.588							54.5718	97.8533		0.0342668	0.28427	FineSilt-ModeratelySorted	1.0625	3906.7	3150.84	4815.42	8049.09	2544.61	736.728	1373.26	0	2352.29	4	63.7941	19525	1988	1280	20233	80.0959	91.7862	1.27295	96.8595	6.34623	91.4563	195.633	41975.4	21060.3	0	0	14.0504
Pzh_00136	no	UXO	large box with discs	44.6797							16.0847	18.9989		0.0337209	0.289868	FineSilt-PoorlySorted	1.0625	4201.65	2336.9	4872.38	7667.24	3361.16	942.147	1501.51	0	1542.19	4	56.3638	21728	2268	2916	21080	71.0605	84.8365	1.24935	88.9575	5.37031	84.4849	195.633	41975.4	21060.3	0	0	14.0504
Pzh_00137	no	UXO	large box with discs	104.109							37.4791	59.1068		0.0337456	0.289868	FineSilt-PoorlySorted	1.0625	4184.29	2333.91	4853.82	7684.47	3356.28	926.732	1517.59	0	1549.31	4	56.5687	21728	2268	2916	21080	71.0605	84.8365	1.24935	88.9575	5.37031	84.4849	195.633	41975.4	21060.3	0	0	14.0504
Pzh_00138	no	UXO	large box with discs	176.108							63.3988	119.657		0.0337456	0.289868	FineSilt-PoorlySorted	1.0625	4158.56	2334.39	4827.73	7710.11	3345.35	902.925	1537.87	0	1563.61	4	56.9147	21870	2307	2921	21256	71.0605	84.8365	1.24935	88.9575	5.37031	84.4849	195.633	41975.4	21060.3	0	0	14.0504
Pzh_00139	no	0	0	343.329							123.599	293.048		0.033897	0.289152	FineSilt-PoorlySorted	1.0625	4222.33	2547.35	4956.12	7656.37	3198.26	822.45	1328.46	0	1697.72	4	57.406	21552	2225	2788	20989	80.0959	84.8365	1.24935	88.9575	5.37031	84.4849	195.633	41975.4	21060.3	0	0	14.0504
Pzh_00140	no	UXO	munition boxes	30.5964							11.0147	11.4314		0.0338733	0.289282	FineSilt-PoorlySorted	1.0625	4477.39	2756.65	5262.72	7423.97	3177	486.115	990.261	0	1767.53	4	55.7749	21621	2234	2929	20926	80.0959	75.8432	1.28694	78.9737	4.41739	75.4472	195.633	41975.4	21060.3	0	0	14.0504
Pzh_00141	no	UXO	rack with long grenades	38.1347							13.7285	15.3615		0.0338733	0.289282	FineSilt-PoorlySorted	1.0625	4500.96	2781.6	5291.84	7403.6	3173.14	452.345	956.652	0	1778.89	4	55.6878	21908	2277	3081	21104	80.0959	75.8432	1.28694	78.9737	4.41739	75.4472	195.633	41975.4	21060.3	0	0	14.0504
Pzh_00142	no	UXO	large grenades, munition boxes	209.416							75.3898	150.965		0.0338733	0.289282	FineSilt-PoorlySorted	1.0625	4447.55	2826.7	5252.67	7462.75	3103.04	459.986	970.678	0	1844.34	4	56.3081	21657	2249	2933	20973	80.0959	75.8432	1.28694	78.9737	4.41739	75.4472	195.633	41975.4	21060.3	0	0	14.0504
Pzh_00143	no	0	0	59.5936							21.4537	27.9615		0.0338833	0.288657	FineSilt-PoorlySorted	1.0625	4360.13	2728.13	5142.13	7537.04	3126.78	590	1099.36	0	1794.29	4	56.458	21754	2268	2937	21085	80.0959	75.8432	1.28694	78.9737	4.41739	75.4472	195.633	41975.4	21060.3	0	0	14.0504
Pzh_00144	no	0	0	71.906							25.8862	35.9748		0.0340238	0.289282	FineSilt-PoorlySorted	1.0625	4405.29	2918.39	5236.37	7518.31	3003.72	448.599	958.355	0	1946.59	4	56.9679	21868	2265	2937	21196	80.0959	75.8432	1.28694	78.9737	4.41739	75.4472	195.633	41975.4	21060.3	0	0	14.0504
Pzh_00145	no	0	0	46.0593							16.5814	19.7902		0.0323418	0.296889	Clay-VeryPoorlySorted	1.0625	4878.86	1499.46	5297.56	7040.31	4366.23	790.828	1996.4	0	551.08	4	49.6457	27608	7084	8718	25974	72.9756	70.1046	1.4984	72.3699	3.76376	69.2553	195.633	41975.4	21060.3	0	0	6.77674
Pzh_00146	no	0	0	193.227							69.5616	135.516		0.0323418	0.296889	Clay-VeryPoorlySorted	1.0625	4864.92	1468.49	5274.82	7058.84	4378.52	768.713	2028.52	0	550.178	4	49.2617	27608	7084	8718	25974	72.9756	70.1046	1.4984	72.3699	3.76376	69.2553	195.633	41975.4	21060.3	0	0	6.77674
Pzh_00147	no	0	0	71.4653							25.7275	35.6792		0.0323418	0.296889	Clay-VeryPoorlySorted	1.0625	4844.24	1480.41	5258.03	7077.77	4356.64	787.57	2018.56	0	573.164	4	49.3275	27104	6591	8255	25440	72.9756	70.1046	1.4984	72.3699	3.76376	69.2553	195.633	41975.4	21060.3	0	0	6.77674
Pzh_00148	no	UXO	large boxes with/without discs	35.575							12.807	13.9942		0.0323418	0.298615	Clay-VeryPoorlySorted	1.0625	4929.39	1442.41	5330.01	6998.48	4440.27	720.009	2051.56	0	482.268	4	49.2179	27789	7162	8959	25992	72.9756	64.5544	2.2346	65.8051	3.48525	62.8328	195.633	41975.4	21060.3	0	0	6.77674
Pzh_00149	no	UXO	boxes with discs	206.757							74.4327	148.399		0.0323418	0.298615	Clay-VeryPoorlySorted	1.0625	4959.21	1421.3	5352.71	6972.18	4475.7	689.436	2072.87	0	447.029	4	49.1165	27726	7161	8959	25928	72.9756	64.5544	2.2346	65.8051	3.48525	62.8328	195.633	41975.4	21060.3	0	0	6.77674
Pzh_00150	no	0	0	49.0177							17.6464	21.5141		0.0323418	0.296889	Clay-VeryPoorlySorted	1.0625	4805.95	1557.14	5243.04	7105.32	4277.92	870.274	1946.45	0	639.733	4	50.0354	27045	6587	8244	25388	72.9756	70.1046	1.4984	72.3699	3.76376	69.2553	195.633	41975.4	21060.3	0	0	6.77674
Pzh_00151	no	0	0	87.6518							31.5547	46.9222		0.0327801	0.296889	Clay-VeryPoorlySorted	1.0625	4796.83	1586.54	5242.77	7110.62	4251.25	899.835	1918.36	0	661.87	4	50.3003	26764	6512	8011	25265	72.9756	70.1046	1.4984	72.3699	3.76376	69.2553	195.633	41975.4	21060.3	0	0	6.77674
Pzh_00152	no	0	0	188.703							67.9329	131.277		0.0327801	0.296889	Clay-VeryPoorlySorted	1.0625	4779.29	1576.96	5222.62	7129.49	4246.99	898.077	1930.94	0	671.323	4	50.1762	26735	6512	8011	25236	72.9756	70.1046	1.4984	72.3699	3.76376	69.2553	195.633	41975.4	21060.3	0	0	6.77674
Pzh_00153	no	0	0	105.734							38.0642	60.3482		0.0327801	0.296889	Clay-VeryPoorlySorted	1.0625	4789.51	1607.92	5241.89	7115.26	4231.4	921.629	1898.12	0	678.967	4	50.4831	26764	6512	8011	25265	71.0605	70.1046	1.4984	72.3699	3.76376	69.2553	195.633	41975.4	21060.3	0	0	6.77674
Pzh_00154	no	0	0	187.882							67.6374	130.511		0.032964	0.2952	Clay-VeryPoorlySorted	1.0625	4591.83	1734.86	5083.07	7300.38	4022.45	1107.45	1825.84	0	899.519	4	51.423	24067	3638	5421	22284	71.0605	70.1046	1.4984	72.3699	3.76376	69.2553	195.633	41975.4	21060.3	0	0	6.77674
Pzh_00155	yes	UXO	large munition boxes with discs	103.566	0.25	1	1.25	1.21	1.02	1.5	9.67	15.8104	0.25	0.0337209	0.289868	FineSilt-PoorlySorted	1.0625	4325.12	2331.63	4995.06	7544.15	3422.87	931.513	1414.2	0	1473.1	4	54.8542	22221	2309	3396	21134	71.0605	77.2638	1.27923	80.4158	4.43128	76.7752	195.633	41975.4	21060.3	0	0	14.0504
Pzh_00156	no	0	0	47.3374							17.0415	20.5304		0.0337209	0.289868	FineSilt-PoorlySorted	1.0625	4300.57	2315.79	4965.78	7568.28	3423.44	960.32	1444.54	0	1473.61	4	55.0259	21927	2274	3200	21001	71.0605	77.2638	1.27923	80.4158	4.43128	76.7752	195.633	41975.4	21060.3	0	0	14.0504
Pzh_00157	no	0	0	195.454							70.3635	137.617		0.0337209	0.289868	FineSilt-PoorlySorted	1.0625	4296.68	2344.05	4970.3	7572.78	3398.89	937.474	1424.22	0	1497.55	4	55.2476	22143	2291	3219	21215	71.0605	77.2638	1.27923	80.4158	4.43128	76.7752	195.633	41975.4	21060.3	0	0	14.0504
Pzh_00158	no	0	0	205.618							74.0223	147.302		0.0325554	0.298673	Clay-VeryPoorlySorted	1.0625	5009.07	1585.3	5447.5	6899.41	4400.27	828.246	1911.82	0	495.6	4	50.9051	28546	7821	9663	26704	72.9756	70.1046	1.4984	72.3699	3.76376	69.2553	195.633	41975.4	21060.3	0	0	6.77674
Pzh_00159	no	0	0	144.637							52.0692	91.8801		0.0325554	0.299562	Clay-VeryPoorlySorted	1.0625	5055.07	1574.84	5488.02	6855.43	4442.7	805.498	1927.43	0	454.243	4	51.02	29933	9618	10935	28616	72.9756	64.5544	2.2346	65.8051	3.48525	62.8328	195.633	41975.4	21060.3	0	0	6.77674
Pzh_00160	no	UXO	large boxes with discs	2383.41							858.026	3944.23		0.0319226	0.298615	FineSilt-ModeratelySorted	1.0625	4952.92	1328.3	5319.44	6994.12	4534.81	608.608	2165.67	0	427.861	4	47.9581	27741	7183	8958	25966	72.9756	64.5544	2.2346	65.8051	3.48525	62.8328	195.633	41975.4	21060.3	0	0	6.77674
Pzh_00161	no	0	0	60.0494							21.6178	28.2489		0.0323418	0.299562	Clay-VeryPoorlySorted	1.0625	5003.25	1523.06	5424.27	6913.43	4438.35	769.947	1973.52	0	459.44	4	50.3592	28668	7851	9676	26843	72.9756	64.5544	2.2346	65.8051	3.48525	62.8328	195.633	41975.4	21060.3	0	0	6.77674
Pzh_00162	no	0	0	61.4711							22.1296	29.1498		0.0323418	0.299562	Clay-VeryPoorlySorted	1.0625	4987.06	1517.61	5407.27	6930.19	4430.05	769.803	1977.84	0	469.384	4	50.2382	28674	7855	9676	26853	72.9756	64.5544	2.2346	65.8051	3.48525	62.8328	195.633	41975.4	21060.3	0	0	6.77674
Pzh_00163	no	0	0	147.041							52.9349	93.9354		0.0323418	0.298615	Clay-VeryPoorlySorted	1.0625	4988.6	1464.69	5393.53	6936.36	4467.29	719.218	2030.78	0	439.62	4	49.7268	28676	7848	9699	26825	72.9756	64.5544	2.2346	65.8051	3.48525	62.8328	195.633	41975.4	21060.3	0	0	6.77674
Pzh_00164	no	UXO	large boxes with/without discs	27.8734							10.0344	10.0876		0.0319226	0.298615	FineSilt-ModeratelySorted	1.0625	4990.3	1413.18	5380.28	6942.7	4503.59	670.45	2082.29	0	415.421	4	49.1823	28443	7763	9566	26640	72.9756	64.5544	2.2346	65.8051	3.48525	62.8328	195.633	41975.4	21060.3	0	0	6.77674
Pzh_00165	no	0	0	94.6756							34.0832	52.0349		0.0323418	0.298615	Clay-VeryPoorlySorted	1.0625	4931.72	1477.43	5342.49	6990.84	4417.8	751.088	2016.51	0	495.226	4	49.6082	27989	7186	9090	26085	72.9756	64.5544	2.2346	65.8051	3.48525	62.8328	195.633	41975.4	21060.3	0	0	6.77674
Pzh_00166	no	UXO	large boxes with/without discs	130.509							46.9832	80.0443		0.0323418	0.298615	Clay-VeryPoorlySorted	1.0625	4924.31	1460.85	5330.48	7000.71	4424.04	738.682	2033.18	0	494.377	4	49.4002	27789	7162	8959	25992	72.9756	64.5544	2.2346	65.8051	3.48525	62.8328	195.633	41975.4	21060.3	0	0	6.77674
Pzh_00167	no	UXO	large boxes with/without discs	97.2422							35.0072	53.9363		0.0323418	0.298615	Clay-VeryPoorlySorted	1.0625	4905.17	1461.02	5311.93	7019.75	4410.74	746.148	2033.52	0	511.433	4	49.3256	27789	7162	8959	25992	72.9756	64.5544	2.2346	65.8051	3.48525	62.8328	195.633	41975.4	21060.3	0	0	6.77674
Pzh_00168	no	0	0	79.441							28.5988	41.1212		0.0323418	0.298615	Clay-VeryPoorlySorted	1.0625	4950.42	1463.92	5356.62	6974.29	4440.27	731.863	2030.11	0	472.679	4	49.5438	28506	7764	9566	26704	72.9756	64.5544	2.2346	65.8051	3.48525	62.8328	195.633	41975.4	21060.3	0	0	6.77674
Pzh_00169	no	UXO	large boxes with/without discs	137.553							49.5191	85.8937		0.0323418	0.296889	Clay-VeryPoorlySorted	1.0625	4889.73	1480.55	5302.62	7032.22	4386.71	769.665	2014.69	0	533.269	4	49.4814	27608	7084	8718	25974	72.9756	70.1046	1.4984	72.3699	3.76376	69.2553	195.633	41975.4	21060.3	0	0	6.77674
Pzh_00172	no	0	0	49.0072							17.6426	21.5079		0.0337954	0.292298	VeryFineSilt-PoorlySorted	1.0625	4720.18	3089.02	5732.6	7060.32	3238.89	96.2401	492.073	0	1855.57	4	51.9974	23866	3711	4856	22721	68.5315	66.8895	1.42703	69.3711	3.90861	66.2475	195.633	41975.4	21060.3	0	0	14.0504
Pzh_00173	no	0	0	28.2825							10.1817	10.2867		0.0337954	0.293331	FineSilt-PoorlySorted	1.0625	4821.16	2987.93	5731.92	7016.12	3334.73	199.099	553.269	0	1745.27	4	51.2604	23767	3779	5046	22500	68.5315	66.8895	1.42703	69.3711	3.90861	66.2475	195.633	41975.4	21060.3	0	0	14.0504
Pzh_00174	no	0	0	34.7222							12.5	13.5459		0.0337954	0.292298	VeryFineSilt-PoorlySorted	1.0625	4697.12	3125.96	5748.98	7059.02	3218.88	83.7358	463.08	0	1885.72	4	52.0229	23801	3702	4846	22657	68.5315	66.8895	1.42703	69.3711	3.90861	66.2475	195.633	41975.4	21060.3	0	0	14.0504
Pzh_00175	no	UXO	Luftminen?	129.748							46.7092	79.4186		0.0337954	0.292298	FineSilt-PoorlySorted	1.0625	4728.71	3063.73	5712.9	7070.73	3244.84	104.386	518.114	0	1840.38	4	52.1064	23892	3714	4855	22751	68.5315	66.8895	1.42703	69.3711	3.90861	66.2475	195.633	41975.4	21060.3	0	0	14.0504
Pzh_00176	no	0	0	159.098							57.2754	104.412		0.0339798	0.289754	VeryFineSilt-PoorlySorted	1.0625	4549.52	3164.27	5619.22	7220.38	3064.28	82.6273	560.607	0	2007.03	4	54.0459	22749	2816	3797	21768	80.0959	66.8895	1.42703	69.3711	3.90861	66.2475	195.633	41975.4	21060.3	0	0	14.0504
Pzh_00177	no	0	0	77.6772							27.9638	39.9009		0.0336748	0.29317	VeryFineSilt-PoorlySorted	1.0625	4764.82	3150.03	5851.91	6954.68	3294.86	186.789	384.987	0	1844.47	4	50.6863	23901	3802	5043	22660	68.5315	66.8895	1.42703	69.3711	3.90861	66.2475	195.633	41975.4	21060.3	0	0	14.0504
Pzh_00178	no	0	0	261.073							93.9863	202.93		0.0336748	0.294418	VeryFineSilt-PoorlySorted	1.0625	4917.74	3081.4	5940.59	6822.79	3449.21	327.602	413.312	0	1704.97	4	48.7518	26453	6632	7508	25577	68.5315	66.8895	1.42703	69.3711	3.90861	66.2475	195.633	41975.4	21060.3	0	0	14.0504
Pzh_00179	no	0	0	151.676							54.6034	97.9292		0.0337954	0.294418	FineSilt-PoorlySorted	1.0625	4846.53	3049.23	5829.78	6933.81	3369.3	229.702	466.499	0	1747.32	4	50.2131	24591	4480	5723	23348	68.5315	66.8895	1.42703	69.3711	3.90861	66.2475	195.633	41975.4	21060.3	0	0	14.0504
Pzh_00183	no	UXO	large granades sticking in the ground	52.851							19.0264	23.8011		0.0337959	0.287017	VeryFineSilt-PoorlySorted	1.0625	3994.6	3955.76	6092.16	7211.06	2636.34	910.371	788.882	0	2794.16	4	56.6709	21045	2127	2350	20822	79.5914	71.4618	1.28564	75.0536	4.87742	71.0831	88.5	18086.4	9059.64	0	0	14.0504
Pzh_00184	no	0	0	22.1114							7.96011	7.39347		0.0337869	0.290634	VeryFineSilt-PoorlySorted	1.0625	4606.27	3302.07	5847.79	7032.13	3145.7	147.291	328.795	0	2017.56	4	51.8559	24049	3684	4879	22854	68.5315	66.8895	1.42703	69.3711	3.90861	66.2475	195.633	41975.4	21060.3	0	0	14.0504
Pzh_00185	yes	UXO	large boxes with discs	147.081	1.25	1	1.5	1.22	0.99	2.25	53.33	87.1945	0.5	0.0337385	0.299751	FineSilt-ModeratelySorted	1.0625	5502.44	4169.69	5161.47	5630.41	4217.95	291.697	1193.17	0	1786.76	4	39.9576	52115	47021	34118	65018	60.2192	49.3363	3.23257	50.1545	4.05078	46.5242	195.633	41975.4	21060.3	0	0	12.6
Pzh_00186	yes	UXO	large boxes with discs	236.732	1.5	1	1.5	1.19	1.1	2.25	53.33	87.1945	0.5	0.0337385	0.299751	FineSilt-ModeratelySorted	1.0625	5520.14	4219.57	5130.36	5593.34	4244.2	238.123	1241.6	0	1811.89	4	39.8508	53886	49454	35774	67566	60.2192	49.3363	3.23257	50.1545	4.05078	46.5242	195.633	41975.4	21060.3	0	0	12.6
Pzh_00187	yes	UXO	large boxes	187.714	1.5	1	2.25	1.22	1.06	2	31.33	51.2246	1	0.03283	0.300967	FineSilt-ModeratelySorted	1.0625	5652.42	4548.89	4921.63	5345.71	4433.44	118.063	1571.01	0	2002.25	4	38.7197	59493	59513	41771	77235	59.699	48.0532	5.47417	47.1021	4.52304	42.886	195.633	41975.4	21060.3	0	0	12.6
Pzh_00188	no	UXO	0	445.116							160.242	415.176		0.0341083	0.264702	MediumSilt-ModeratelySorted	4.0625	2598.88	2430.21	5053.37	8757.4	1113.66	668.416	2200.32	0	3861.99	4	90.9966	18460	1793	484	19769	106.846	104.087	1.40072	109.487	6.80047	103.671	88.5	18086.4	9059.64	0	2.45	14.0504
Pzh_00189	no	UXO	0	72.6488							26.1536	36.4743		0.0341083	0.264702	MediumSilt-ModeratelySorted	4.0625	2588.63	2412.78	5029.53	8781.26	1098.55	643.329	2218.1	0	3867.27	4	91.2882	18497	1809	485	19821	106.846	103.07	1.55885	109.652	8.14056	102.299	88.5	18086.4	9059.64	0	2.45	14.0504
Pzh_00190	no	UXO	0	144.41							51.9878	91.6874		0.0341083	0.267467	MediumSilt-ModeratelySorted	4.0625	2610.03	2432	5026.6	8768.14	1118.84	643.951	2199.19	0	3845.68	4	90.7111	18458	1805	485	19778	106.846	103.07	1.55885	109.652	8.14056	102.299	88.5	18086.4	9059.64	0	2.45	14.0504
Pzh_00192	yes	UXO	large boxes	125.85	1	1	2	1.23	1.08	2	41.33	67.5746	0.75	0.03283	0.300532	FineSilt-ModeratelySorted	1.0625	5678.48	4617.76	4881.95	5297.77	4471.56	186.859	1638.35	0	2049.24	4	38.4159	62777	65146	45417	82506	59.699	48.0532	5.47417	47.1021	4.52304	42.886	195.633	41975.4	21060.3	0	0	12.6
Pzh_00194	no	0	0	23.3611							8.40999	7.95945		0.0331872	0.296657	VeryFineSilt-PoorlySorted	1.0625	5064.06	3214.48	5981.01	6562.91	3621.2	578.844	363.621	0	1642.61	4	46.2018	29228	9898	10104	29022	66.1209	59.0067	1.68521	61.0672	3.74571	57.9658	195.633	41975.4	21060.3	0	0	14.0504
Pzh_00195	no	0	0	21.1882							7.62775	6.98227		0.0331872	0.296657	VeryFineSilt-PoorlySorted	1.0625	5093.34	3247.02	5931.82	6509.9	3656.31	632.94	375.922	0	1632.58	4	45.9745	30470	12039	11490	31019	66.1209	59.0067	1.68521	61.0672	3.74571	57.9658	195.633	41975.4	21060.3	0	0	14.0504
Pzh_00196	no	0	0	190.636							68.6291	133.085		0.0311797	0.303676	FineSilt-ModeratelySorted	1.0625	5634.44	1266.1	5474.34	6365.39	5185.1	497.162	2512.28	0	0	4	64.516	42271	28548	23690	47129	72.9756	57.4307	5.32714	55.2974	3.19379	52.3921	195.633	41975.4	21060.3	0	0	6.77674
Pzh_00197	no	0	0	141.672							51.002	89.3624		0.0307471	0.302679	FineSilt-ModeratelySorted	1.0625	5486.95	1091.64	5631.88	6537.49	5145.71	303.544	2580.58	0	108.385	4	59.3128	39463	24127	20918	42672	72.9756	61.316	3.89244	60.996	3.57242	57.8318	195.633	41975.4	21060.3	0	0	6.77674
Pzh_00198	no	0	0	122.959							44.2652	73.8937		0.0307471	0.303676	FineSilt-ModeratelySorted	1.0625	5506.88	1108	5611.11	6515.81	5155.35	324.666	2577.7	0	87.6335	4	60.137	39463	24127	20918	42672	72.9756	61.316	3.89244	60.996	3.57242	57.8318	195.633	41975.4	21060.3	0	0	6.77674
Pzh_00199	no	UXO	bombs, cartridges	396.863							142.871	355.936		0.0306395	0.305208	FineSilt-ModeratelySorted	2.0625	5693.46	1085.9	5438.01	6364.31	5376.13	429.85	2755.86	0	49.5504	4	68.4162	45979	34106	27169	52916	88.1112	61.316	3.89244	60.996	3.57242	57.8318	195.633	41975.4	21060.3	0	2.6	6.77674
Pzh_00200	yes	UXO	large boxes	326.511	1	1	1.75	1.19	1.09	2	38.67	63.2255	0.25	0.0306395	0.305619	FineSilt-ModeratelySorted	2.0625	5676.14	949.539	5474.6	6421.76	5452.65	377.642	2888.8	0	175.106	4	66.1516	43437	30498	24792	49143	88.1112	61.0889	7.31566	57.7163	3.94311	54.1127	195.633	41975.4	21060.3	0	2.6	6.77674
Pzh_00201	no	UXO	bombs, cartridges	349.901							125.964	300.599		0.0306395	0.30441	FineSilt-ModeratelySorted	2.0625	5705.79	1016.02	5437.03	6376.6	5440.63	414.914	2844.99	0	110.073	4	68.3331	45996	34101	27185	52912	88.1112	61.0889	7.31566	57.7163	3.94311	54.1127	195.633	41975.4	21060.3	0	2.6	6.77674
Pzh_00202	yes	UXO	bombs, cluster bombs	155.737	1.25	1	1.75	2.02	1.17	2.5	32.33	52.8595	1.25	0.0306395	0.305619	FineSilt-ModeratelySorted	2.0625	5729.05	1029.4	5413.95	6354.19	5459.34	437.772	2854.24	0	94.7738	4	69.4477	46160	34118	27280	52998	88.1112	61.0889	7.31566	57.7163	3.94311	54.1127	195.633	41975.4	21060.3	0	2.6	6.77674
Pzh_00203	no	UXO	large grenades stking in the ground	358.274							128.979	310.289		0.0339905	0.287298	FineSilt-PoorlySorted	1.0625	4165.53	2909.27	5002.45	7753.38	2871.95	677.937	1180	0	2035.79	4	59.0447	21044	2121	2189	20976	80.0959	91.7862	1.27295	96.8595	6.34623	91.4563	195.633	41975.4	21060.3	0	0	14.0504
Pzh_00204	no	UXO	boxes with discs	167.968							60.4684	112.295		0.0334141	0.295663	FineSilt-PoorlySorted	1.0625	5146.45	2765.97	5888.79	6749.72	3696.87	562.405	734.461	0	1391.09	4	47.2256	27500	7576	8488	26588	66.1209	60.9427	1.72304	62.4262	3.20648	59.8361	195.633	41975.4	21060.3	0	0	14.0504
Pzh_00205	no	UXO	boxes with discs	116.69							42.0085	68.8838		0.0331368	0.293649	Clay-VeryPoorlySorted	1.0625	4699.53	1946.64	5252.99	7175.35	3929.92	1193.23	1581.63	0	966.888	4	52.1913	24620	3675	5695	22600	71.0605	70.1046	1.4984	72.3699	3.76376	69.2553	195.633	41975.4	21060.3	0	0	6.77674
Pzh_00206	no	0	0	262.185							94.3865	204.09		0.0333033	0.296657	VeryFineSilt-PoorlySorted	1.0625	5116.03	3291.22	5884.86	6457.51	3686.08	686.025	388.329	0	1632.4	4	45.6989	31410	13174	12447	32137	66.1209	59.0067	1.68521	61.0672	3.74571	57.9658	195.633	41975.4	21060.3	0	0	14.0504
Pzh_00207	no	0	0	245.638							88.4296	186.997		0.0327624	0.306599	FineSilt-PoorlySorted	1.0625	6853.92	3440.46	4172.43	4826.49	5450.26	1693.96	2141.71	0	398.237	4	74.8131	98485	117697	81957	134225	111.509	57.3256	15.7911	50.2632	8.72869	41.9233	195.633	41975.4	21060.3	0	0	12.6
Pzh_00208	no	0	0	24.7221							8.89997	8.58776		0.0327624	0.306002	FineSilt-PoorlySorted	1.0625	6855.8	3423.24	4177.97	4834.42	5450.35	1706.11	2141.74	0	380.378	4	74.7444	98691	117711	82032	134370	111.509	57.3256	15.7911	50.2632	8.72869	41.9233	195.633	41975.4	21060.3	0	0	12.6
Pzh_00209	no	0	0	34.5581							12.4409	13.4601		0.0327624	0.306002	FineSilt-PoorlySorted	1.0625	6850.93	3418.22	4184.13	4840.78	5445.08	1704.72	2136.47	0	376.178	4	74.6036	98691	117711	82032	134370	111.509	57.3256	15.7911	50.2632	8.72869	41.9233	195.633	41975.4	21060.3	0	0	12.6
Pzh_00210	no	0	0	36.6374							13.1895	14.5577		0.0327624	0.306002	FineSilt-PoorlySorted	1.0625	6841.79	3399.1	4199.73	4858.02	5434.23	1708.18	2125.66	0	358.6	4	74.3532	96944	114678	80199	131423	111.509	57.3256	15.7911	50.2632	8.72869	41.9233	195.633	41975.4	21060.3	0	0	12.6
Pzh_00211	no	0	0	29.2768							10.5397	10.7749		0.0327624	0.306002	FineSilt-PoorlySorted	1.0625	6854.89	3382.13	4195.85	4857.51	5445.33	1730.49	2136.94	0	338.747	4	74.7401	98551	116950	81767	133734	111.509	57.3256	15.7911	50.2632	8.72869	41.9233	195.633	41975.4	21060.3	0	0	12.6
Pzh_00212	no	0	0	20.9592							7.54533	6.88122		0.0327624	0.306002	FineSilt-PoorlySorted	1.0625	6852.86	3394.09	4192.55	4852.48	5444.54	1721.28	2136.03	0	351.279	4	74.6232	96944	114678	80199	131423	111.509	57.3256	15.7911	50.2632	8.72869	41.9233	195.633	41975.4	21060.3	0	0	12.6
Pzh_00213	no	0	0	37.5946							13.5341	15.0703		0.0327624	0.306002	FineSilt-PoorlySorted	1.0625	6863.05	3397.51	4182.59	4843.02	5454.84	1728.42	2146.33	0	352.974	4	74.8863	98460	116934	81763	133631	111.509	57.3256	15.7911	50.2632	8.72869	41.9233	195.633	41975.4	21060.3	0	0	12.6
Pzh_00214	no	0	0	197.952							71.2626	139.981		0.0339639	0.295862	VeryFineSilt-PoorlySorted	1.0625	4876.49	4824.52	5631.78	5989.63	3730.58	775.866	1430.31	0	2662.56	4	40.7338	35837	21399	17274	39962	60.2192	53.9339	1.53567	57.4432	5.04494	52.98	88.5	18086.4	9059.64	0	0	14.0504
Pzh_00215	no	0	0	34.5608							12.4419	13.4615		0.0340132	0.287641	FineSilt-ModeratelySorted	3.5	4133.16	4115.26	6309.54	6523.83	3278.83	1925.49	2262.4	0	3826.99	4	42.6419	23336	5255	5055	23536	72.8159	54.217	1.04673	58.4746	5.30431	53.7555	88.5	18086.4	9059.64	0	0	14.0504
Pzh_00216	no	0	0	40.8323							14.6996	16.8368		0.0340132	0.286673	FineSilt-ModeratelySorted	3.5	4105.95	4089.28	6336.13	6552.97	3246.83	1928.94	2244.02	0	3823.96	4	43.2865	23450	5262	5055	23657	72.8159	54.217	1.04673	58.4746	5.30431	53.7555	88.5	18086.4	9059.64	0	0	14.0504
Pzh_00217	no	UXO	munition boxes different types	285.23							102.683	228.514		0.0336515	0.283868	FineSilt-ModeratelySorted	3.5	3805.65	3784.75	6639.13	6843.77	2993.62	2189.3	2343.22	0	4042.79	4	48.1561	21564	2839	2807	21596	72.8159	64.7936	1.11203	68.643	4.96139	64.4894	88.5	18086.4	9059.64	0	0	14.0504
Pzh_00218	no	0	0	3119.26							1122.93	5659.08		0.0287967	0.256734	MediumSilt-ModeratelySorted	4.0625	2265.02	1910.25	4510.21	9430.61	750.368	304.878	2791.66	0	4187.11	4	99.6536	17450	1758	370	18838	94.9018	88.0347	1.7718	95.5458	9.28288	86.7151	88.5	18086.4	9059.64	0	2.45	14.0504
Pzh_00219	yes	UXO	small boxes, long Stabbomben?/Stabgranaten?	209.586	2	1	1.25	1.19	0.53	2.5	238.33	389.67	2	0.0340232	0.260195	MediumSilt-ModeratelySorted	4.0625	2309.57	2119.27	4948.95	9042.42	806.374	577.937	2511.33	0	4128.3	4	97.23	17971	1756	413	19314	106.846	101.492	1.69873	108.19	8.3963	100.494	88.5	18086.4	9059.64	0	2.45	14.0504
Pzh_00220	no	0	0	146.873							52.8744	93.7914		0.0346818	0.266327	MediumSilt-ModeratelySorted	4.0625	2415.73	2373.26	5501.95	8609.6	1105.22	1111.37	2316.16	0	4180.95	4	91.2808	18572	1750	503	19819	106.846	108.052	1.60984	113.687	7.24395	107.36	88.5	18086.4	9059.64	0	2.45	14.0504
Pzh_00221	no	0	0	179.676							64.6833	122.921		0.0358131	0.264172	MediumSilt-ModeratelySorted	4.0625	2265.85	2247.45	5952.77	8514.43	1267.09	1593.83	2590.27	0	4559.61	4	90.6006	18912	1735	525	20122	95.9154	112.77	1.79028	118.003	7.02329	112.014	88.5	18086.4	9059.64	0	2.45	14.0504
Pzh_00222	yes	UXO	bombs, catridges	1078.63	2.5	1.5	2.25	2.02	1.02	2.5	3978	6504.03	2.75	0.0345434	0.263202	MediumSilt-ModeratelySorted	4.0625	2689.2	2349.84	4524.31	9097.36	1159.71	200.248	2397.97	0	3749.66	4	94.1829	17713	1812	414	19111	94.9018	95.5008	1.78664	103.172	9.45833	94.243	88.5	18086.4	9059.64	0	2.45	14.0504
Pzh_00223	no	0	0	426.621							153.584	392.197		0.0329468	0.280679	FineSilt-ModeratelySorted	3.5	3779.7	3740.47	6686.63	6853.81	3070	2403.25	2605.48	0	4283.15	4	46.0835	21216	2808	2690	21334	72.8159	59.9336	0.956183	63.9374	4.95997	59.6871	88.5	18086.4	9059.64	0	0	14.0504
Pzh_00224	no	UXO	large boxes	400.204							144.074	359.963		0.0316766	0.30012	FineSilt-ModeratelySorted	1.0625	5114.38	1134.19	5418.05	6873.6	4783.4	363.908	2375.29	0	294.005	4	47.1093	30577	10446	11767	29256	72.9756	64.5544	2.2346	65.8051	3.48525	62.8328	195.633	41975.4	21060.3	0	0	6.77674
Pzh_00225	no	UXO	open TNT	1865.69							671.647	2839.62		0.0362127	0.278929	FineSilt-ModeratelySorted	1.0625	5848.91	3004.72	4780.56	4819.43	5237.49	2774.11	3868.92	0	4633.83	4	29.2679	66874	73910	50863	89921	74.418	35.1624	3.62765	38.8786	7.3439	31.5862	48.5333	10311.5	5189.51	0	0	12.458
Pzh_00226	no	0	0	232.437							83.6772	173.639		0.0321097	0.306599	FineSilt-PoorlySorted	1.0625	6847.08	3648.05	4095.65	4722.03	5465.65	1568.26	2164.61	0	611.003	4	78.636	102895	125719	86758	141856	111.509	57.3256	15.7911	50.2632	8.72869	41.9233	195.633	41975.4	21060.3	0	0	12.6
Pzh_00227	no	0	0	478.746							172.349	457.797		0.0324256	0.306599	FineSilt-PoorlySorted	1.0625	6835.99	3542.17	4146.4	4785.65	5443.38	1617.22	2137.09	0	505.277	4	76.2142	99230	119793	83014	136009	111.509	57.3256	15.7911	50.2632	8.72869	41.9233	195.633	41975.4	21060.3	0	0	12.6
Pzh_00228	no	UXO	0	153.788							55.3636	99.7629		0.0341926	0.2938	VeryFineSilt-PoorlySorted	1.0625	4630.61	4612.76	5879.56	6233.42	3484.27	988.074	1358.65	0	2799.96	4	43.1135	30665	14430	12309	32786	63.1012	53.9339	1.53567	57.4432	5.04494	52.98	88.5	18086.4	9059.64	0	0	14.0504
Pzh_00229	no	0	0	233.771							84.1574	174.977		0.034132	0.29401	VeryFineSilt-PoorlySorted	1.0625	4851.38	4681.79	5682.81	6059.97	3672.22	744.443	1283.1	0	2568.94	4	41.6501	35357	20473	16675	39155	60.2192	50.8924	2.12241	53.3414	4.57144	49.256	88.5	18086.4	9059.64	0	0	14.0504
Pzh_00230	no	UXO	0	119.427							42.9936	71.0596		0.0341926	0.29401	VeryFineSilt-PoorlySorted	1.0625	4739.41	4717.07	5788.26	6158.03	3568.7	858.406	1284.79	0	2662.55	4	42.4866	31516	14895	12989	33422	60.2192	53.9339	1.53567	57.4432	5.04494	52.98	88.5	18086.4	9059.64	0	0	14.0504
Pzh_00231	no	UXO	0	130.944							47.1398	80.4024		0.0341926	0.29401	VeryFineSilt-PoorlySorted	1.0625	4740	4689.82	5792.99	6166.58	3562.76	851.034	1257.76	0	2642.6	4	42.5653	31572	14900	13000	33472	60.2192	53.9339	1.53567	57.4432	5.04494	52.98	88.5	18086.4	9059.64	0	0	14.0504
Pzh_00232	no	0	0	309.832							111.54	255.341		0.0340877	0.29738	VeryFineSilt-PoorlySorted	1.0625	5087.9	4364.41	5518.21	5945.58	3840.25	498.529	1082.04	0	2194.77	4	41.0709	41030	29075	22435	47670	60.2192	50.8924	2.12241	53.3414	4.57144	49.256	195.633	41975.4	21060.3	0	0	14.0504
Pzh_00233	no	0	0	78.475							28.251	40.4517		0.0345586	0.274442	FineSilt-PoorlySorted	1.0625	2978.25	3164.73	3861.21	8920.93	2451.89	353.07	2327.58	0	2745.59	4	82.6347	18206	2022	682	19546	91.4913	97.7242	2.00059	105.961	10.2375	96.1702	195.633	41975.4	21060.3	0	0	14.0504
Pzh_00234	no	0	0	302.736							108.985	247.525		0.0328775	0.279266	FineSilt-ModeratelySorted	3.5	3644.92	3613.94	6809.98	6992.63	2905.25	2410.68	2517.17	0	4256.56	4	49.6129	20373	1944	1939	20378	72.8159	72.7485	1.11487	76.3704	4.73678	72.5617	88.5	18086.4	9059.64	0	0	14.0504
Pzh_00235	no	0	0	39.5164							14.2259	16.1128		0.0338039	0.287417	FineSilt-PoorlySorted	1.0625	3924.01	2151.99	4519.48	7949.07	3434.4	794.292	1895.66	0	1589.28	4	58.0371	20938	2163	2402	20699	78.3816	85.567	1.21856	90.0228	5.67435	85.1231	195.633	41975.4	21060.3	0	0	6.77674
Pzh_00236	no	0	0	47.2228							17.0002	20.4638		0.0342352	0.282286	FineSilt-ModeratelySorted	1.0625	3689.33	2935.45	4535.09	8218.23	2668.56	428.208	1640.18	0	2254.96	4	67.5747	19603	2039	1307	20335	91.4913	91.7862	1.27295	96.8595	6.34623	91.4563	195.633	41975.4	21060.3	0	0	14.0504
Pzh_00237	no	0	0	96.4709							34.7295	53.363		0.0345752	0.279507	MediumSilt-ModeratelySorted	1.0625	3516.38	3194.04	4438.3	8428.6	2391.74	441.827	1762.35	0	2540.47	4	74.2747	18987	2000	941	20046	91.4913	97.6809	1.51929	103.978	7.81687	96.924	195.633	41975.4	21060.3	0	0	14.0504
Pzh_00238	no	0	0	326.917							117.69	274.408		0.0352403	0.267775	MediumSilt-ModeratelySorted	1.0625	3155.37	2763.57	4335.62	8942.18	1632.86	570.286	2191.51	0	3311.93	4	90.8307	17924	1874	469	19329	100.15	99.5292	1.74193	107.063	9.27554	98.3988	88.5	18086.4	9059.64	0	0	14.0504
Pzh_00239	no	UXO	boxes	756.391							272.301	845.648		0.0352403	0.271214	MediumSilt-ModeratelySorted	1.0625	3182.11	2792.17	4302.29	8947.23	1672.14	604.522	2196.24	0	3282.65	4	91.4208	18064	1887	473	19478	100.15	99.5292	1.74193	107.063	9.27554	98.3988	88.5	18086.4	9059.64	0	0	14.0504
Pzh_00240	no	?	0	169.288							60.9436	113.481		0.0334939	0.266218	MediumSilt-ModeratelySorted	1.0625	2830.26	2474.24	4467	9046.39	1302.49	282.881	2323.26	0	3614.77	4	92.5396	17729	1812	425	19116	100.15	95.5008	1.78664	103.172	9.45833	94.243	88.5	18086.4	9059.64	0	0	14.0504
Pzh_00241	yes	UXO	long munition boxes, grenade racks?	230.194	1.5	1	1.75	1.46	0.89	2.75	84	137.34	2	0.0334939	0.263202	MediumSilt-ModeratelySorted	1.0625	2756.24	2413.26	4511.7	9060.51	1226.75	244.525	2350.83	0	3683.37	4	93.1177	18050	1840	435	19455	94.9018	95.5008	1.78664	103.172	9.45833	94.243	88.5	18086.4	9059.64	0	0	14.0504
Pzh_00242	yes	UXO	munition boxes, grenades	353.605	2.5	1	2.25	0.95	0.6	2.5	346	565.71	2.75	0.0306793	0.300605	FineSilt-ModeratelySorted	1.0625	5301.32	833.597	5504.29	6771.78	5134.59	26.1174	2731.3	0	391.766	4	50.7079	33211	14266	14635	32842	69.1847	61.316	3.89244	60.996	3.57242	57.8318	195.633	41975.4	21060.3	0	0	6.77674
Pzh_00243	no	0	0	106.027							38.1699	60.5731		0.035196	0.271161	MediumSilt-ModeratelySorted	1.0625	3050.24	3043.59	4083.15	8955.78	1992.12	695.194	2234.69	0	3052.32	4	91.5872	17905	1928	527	19306	100.15	100.183	1.65069	107.246	8.71441	99.2269	88.5	18086.4	9059.64	0	0	14.0504
Pzh_00244	no	0	0	28.1651							10.1394	10.2295		0.0343885	0.282708	FineSilt-ModeratelySorted	1.0625	3486.31	2779.25	4270.93	8393.89	2790.46	193.886	1913.53	0	2230.5	4	71.3109	19379	2041	1253	20167	91.4913	97.6809	1.51929	103.978	7.81687	96.924	195.633	41975.4	21060.3	0	0	14.0504
Pzh_00245	no	0	0	197.9							71.244	139.932		0.0343885	0.28146	FineSilt-PoorlySorted	1.0625	3445.15	2751.83	4216.47	8431.34	2817.3	161.771	1971.39	0	2232.33	4	71.7423	19343	2063	1200	20206	91.4913	97.6809	1.51929	103.978	7.81687	96.924	195.633	41975.4	21060.3	0	0	14.0504
Pzh_00246	no	UXO	artillery munition, patly open	308.699							111.132	254.089		0.0343885	0.28146	FineSilt-PoorlySorted	1.0625	3460.25	2760.06	4235.89	8417.39	2809.01	173.347	1950.88	0	2230.25	4	71.6037	19390	2066	1253	20203	91.4913	97.6809	1.51929	103.978	7.81687	96.924	195.633	41975.4	21060.3	0	0	14.0504
Pzh_00247	no	0	0	102.327							36.8377	57.7537		0.0343885	0.28146	FineSilt-ModeratelySorted	1.0625	3462.39	2808.67	4255.72	8419.63	2760.68	166.28	1925.61	0	2263.1	4	71.6053	19228	2045	1196	20077	91.4913	97.6809	1.51929	103.978	7.81687	96.924	195.633	41975.4	21060.3	0	0	14.0504
Pzh_00248	no	0	0	77.5882							27.9317	39.8396		0.0343885	0.280825	FineSilt-ModeratelySorted	1.0625	3433.86	2958.46	4277.45	8464.53	2611.7	182.762	1897.94	0	2386.47	4	72.9584	18929	2014	986	19957	91.4913	97.6809	1.51929	103.978	7.81687	96.924	195.633	41975.4	21060.3	0	0	14.0504
Pzh_00249	no	0	0	76.4113							27.5081	39.0309		0.0342324	0.283775	FineSilt-PoorlySorted	1.0625	3551.43	2591.76	4273.38	8318.63	2977.64	311.64	1946.03	0	2070.63	4	68.8902	19515	2084	1410	20189	91.4913	92.5743	1.3651	97.9544	6.7452	92.0027	195.633	41975.4	21060.3	0	0	14.0504
Pzh_00250	no	UXO	bombes, partly buried	282.549							101.718	225.636		0.0344307	0.279013	FineSilt-PoorlySorted	1.0625	3282.67	2826.65	4066.21	8593.89	2751.66	35.7844	2113.98	0	2365.64	4	73.3567	18864	2055	971	19948	91.4913	97.6809	1.51929	103.978	7.81687	96.924	195.633	41975.4	21060.3	0	0	14.0504
Pzh_00251	no	0	0	248.089							89.3122	189.506		0.0344307	0.279013	FineSilt-PoorlySorted	1.0625	3254.91	2846.12	4042.98	8622.15	2734.96	43.7059	2135.84	0	2392.7	4	73.8944	18723	2042	908	19857	91.4913	97.6809	1.51929	103.978	7.81687	96.924	195.633	41975.4	21060.3	0	0	14.0504
Pzh_00252	no	UXO	boxes	145.084							52.2301	92.2613		0.0344307	0.28146	FineSilt-PoorlySorted	1.0625	3286.94	2784.3	4054.29	8586.68	2795.71	80.6384	2130.15	0	2335.88	4	73.4015	19020	2072	1028	20064	91.4913	97.6809	1.51929	103.978	7.81687	96.924	195.633	41975.4	21060.3	0	0	14.0504
Pzh_00253	no	UXO	0	363.42							130.831	316.284		0.034373	0.280044	FineSilt-PoorlySorted	1.0625	3290.69	2718.82	4032.06	8579.54	2864.82	153.168	2161.65	0	2293	4	73.4556	18741	2046	1023	19764	91.4913	99.3861	1.8565	106.959	9.42894	98.0703	195.633	41975.4	21060.3	0	0	14.0504
Pzh_00254	no	UXO	bombs	1170.83							421.498	1519.75		0.0344307	0.28146	FineSilt-PoorlySorted	1.0625	3321.67	2736.33	4074.12	8550.12	2841.68	121.42	2116.47	0	2286.96	4	72.8722	19020	2072	1028	20064	91.4913	97.6809	1.51929	103.978	7.81687	96.924	195.633	41975.4	21060.3	0	0	14.0504
Pzh_00255	no	0	0	90.0784							32.4282	48.6733		0.0342358	0.269727	FineSilt-PoorlySorted	1.0625	2817.75	2958.81	3861.23	9177.12	1987.69	785.749	2464.9	0	3184.85	4	92.4896	17524	1933	443	19014	100.15	92.133	2.02547	100.693	10.5858	90.4714	88.5	18086.4	9059.64	0	0	14.0504
Pzh_00256	no	0	0	93.2639							33.575	50.9965		0.0342358	0.269727	FineSilt-PoorlySorted	1.0625	2888.06	2973.61	3931.26	9113.12	1976.33	760.745	2396.52	0	3151.51	4	92.5209	17588	1925	454	19059	100.15	97.7242	2.00059	105.961	10.2375	96.1702	88.5	18086.4	9059.64	0	0	14.0504
Pzh_00257	no	0	0	71.817							25.8541	35.9151		0.0348649	0.273259	MediumSilt-ModeratelySorted	1.0625	3296.47	2962.52	4576.44	8656.76	1764.42	767.891	1906.83	0	3134.94	4	83.2989	18594	1924	568	19950	94.1377	101.482	1.43235	107.83	7.78031	100.918	88.5	18086.4	9059.64	0	0	14.0504
Pzh_00258	no	0	0	86.1952							31.0303	45.8789		0.0348649	0.275552	MediumSilt-ModeratelySorted	1.0625	3455.22	3115.43	4506.57	8610.64	1940.19	834.199	1863.44	0	2968.09	4	82.5833	18492	1942	610	19824	100.15	97.5417	1.33698	103.398	7.19349	97.1326	88.5	18086.4	9059.64	0	0	14.0504
Pzh_00259	no	0	0	41.5416							14.955	17.2304		0.0342352	0.2841	FineSilt-ModeratelySorted	1.0625	3794.27	2872.69	4622.74	8108.5	2752.86	514.928	1555.5	0	2158.23	4	65.569	19975	2072	1460	20587	91.4913	91.7862	1.27295	96.8595	6.34623	91.4563	195.633	41975.4	21060.3	0	0	14.0504
Pzh_00260	no	0	0	67.8786							24.4363	33.2976		0.034117	0.2841	FineSilt-ModeratelySorted	1.0625	3808.59	2821.25	4621.54	8087.93	2803.32	518.786	1561.49	0	2110.22	4	65.4264	20185	2086	1581	20690	91.4913	91.7862	1.27295	96.8595	6.34623	91.4563	195.633	41975.4	21060.3	0	0	14.0504
Pzh_00261	no	UXO	munition boxes	175.876							63.3153	119.445		0.034117	0.285922	FineSilt-ModeratelySorted	1.0625	3908.34	2772.93	4708.05	7985.46	2877.42	613.994	1484.06	0	2026.43	4	63.5035	20423	2114	1828	20709	80.0959	91.7862	1.27295	96.8595	6.34623	91.4563	195.633	41975.4	21060.3	0	0	14.0504
Pzh_00262	no	0	0	100.772							36.2777	56.5789		0.0324261	0.294744	VeryFineSilt-PoorlySorted	1.0625	4334.71	1083.57	4556.68	7725.5	4489.32	945.21	2727.44	0	1163.24	4	45.7707	22595	2521	3982	21134	69.1847	77.9043	1.19426	82.3159	5.6059	77.4186	195.633	41975.4	21060.3	0	0	6.77674
Pzh_00263	no	0	0	365.007							131.403	318.138		0.0323324	0.294743	FineSilt-PoorlySorted	1.0625	4454.41	1290.78	4789.66	7518.28	4309.36	875.446	2359.11	0	930.065	4	45.8606	23726	3164	5050	21840	69.1847	77.8911	1.20988	81.5405	4.85935	77.3938	195.633	41975.4	21060.3	0	0	6.77674
Pzh_00264	no	0	0	61.8406							22.2626	29.3851		0.0300279	0.300503	FineSilt-PoorlySorted	2.0625	5350.08	141.02	5324.2	6990.04	5646.31	710.196	3476.72	0	978.507	4	42.4312	32239	12283	13540	30982	70.4153	66.1924	3.40931	68.015	5.23183	63.4061	690.8	149101	139112	0	2.6	6.77674
Pzh_00265	no	0	0	107.371							38.6537	61.6054		0.0300279	0.300503	FineSilt-PoorlySorted	2.0625	5323.69	170.415	5314.74	6993.04	5593.92	655.467	3418.86	0	949.103	4	42.3118	32477	12317	13570	31224	70.4153	66.1924	3.40931	68.015	5.23183	63.4061	195.633	41975.4	21060.3	0	2.6	6.77674
Pzh_00266	yes	UXO	large boxes with discs	94.7616	0.25	1	1.25	1.23	0.99	2	22.33	36.5095	0.5	0.0301785	0.306074	FineSilt-ModeratelySorted	2.0625	5778.85	838.508	5408.64	6390.08	5665.68	515.132	3132.35	0	281.024	4	65.6946	44567	32722	26221	51068	88.1112	61.0889	7.31566	57.7163	3.94311	54.1127	690.8	149101	139112	0	2.6	6.77674
Pzh_00267	no	0	0	157.648							56.7534	103.137		0.031952	0.297067	FineSilt-ModeratelySorted	1.0625	4803.98	1240.87	5145.27	7160.62	4500.59	616.772	2266.65	0	573.895	4	45.9641	26766	5577	7854	24489	69.1847	64.5544	2.2346	65.8051	3.48525	62.8328	195.633	41975.4	21060.3	0	0	6.77674
Pzh_00268	no	UXO	large boxes with discs	454.083							163.47	426.436		0.0306793	0.30441	FineSilt-ModeratelySorted	2.0625	5495.36	910.564	5646.07	6579.99	5274.84	211.205	2771.5	0	250.559	4	58.6439	39749	23954	21001	42702	88.1112	61.316	3.89244	60.996	3.57242	57.8318	195.633	41975.4	21060.3	0	2.6	6.77674
Pzh_00269	yes	UXO	large boxes, small boxes	84.7017	1.5	1	1.5	1.13	0.41	2.5	55	89.925	1.25	0.0306395	0.30441	FineSilt-ModeratelySorted	2.0625	5633.07	1040.77	5499.91	6426.91	5337.7	367.867	2748.15	0	102.114	4	65.5061	42937	28903	24096	47744	88.1112	61.316	3.89244	60.996	3.57242	57.8318	195.633	41975.4	21060.3	0	2.6	6.77674
Pzh_00270	no	0	0	142.082							51.1495	89.7092		0.0306395	0.305619	FineSilt-ModeratelySorted	2.0625	5646.03	900.806	5509.95	6461.58	5451.43	346.926	2912.69	0	223.918	4	64.1327	43639	30542	24800	49381	88.1112	61.0889	7.31566	57.7163	3.94311	54.1127	195.633	41975.4	21060.3	0	2.6	6.77674
Pzh_00271	no	0	0	56.4724							20.3301	26.0145		0.0339905	0.289282	FineSilt-PoorlySorted	1.0625	4369.54	2851.73	5184.48	7543.71	3034.19	510.23	1021.79	0	1901.52	4	56.8912	21696	2253	2934	21015	80.0959	75.8432	1.28694	78.9737	4.41739	75.4472	195.633	41975.4	21060.3	0	0	14.0504
Pzh_00272	no	UXO	Boxes	100.674							36.2426	56.5053		0.0336811	0.297696	FineSilt-ModeratelySorted	1.0625	5304.8	4044.53	5392.86	5870.82	3998.34	503.859	952.563	0	1839.26	4	40.6922	43684	33592	25383	51893	60.2192	49.3363	3.23257	50.1545	4.05078	46.5242	195.633	41975.4	21060.3	0	0	14.0504
Pzh_00273	no	UXO	0	162.533							58.5118	107.447		0.0341926	0.2938	VeryFineSilt-PoorlySorted	1.0625	4664.92	4646.85	5859.97	6225.91	3498.2	932.282	1283.64	0	2720.15	4	43.0848	31056	14517	12549	33024	60.2192	53.9339	1.53567	57.4432	5.04494	52.98	88.5	18086.4	9059.64	0	0	14.0504
Pzh_00274	no	0	0	190.172							68.462	132.65		0.034132	0.295862	VeryFineSilt-PoorlySorted	1.0625	4941.27	4685.58	5592.26	5971.14	3762.53	662.277	1318.15	0	2517.84	4	40.8877	36094	21424	17334	40184	60.2192	50.8924	2.12241	53.3414	4.57144	49.256	195.633	41975.4	21060.3	0	0	14.0504
Pzh_00275	no	0	0	113.049							40.6976	66.015		0.0336811	0.297696	FineSilt-ModeratelySorted	1.0625	5268.9	4138.19	5400.19	5864.25	3978.86	452.884	999.296	0	1923	4	40.7396	44091	33614	25368	52337	60.2192	49.3363	3.23257	50.1545	4.05078	46.5242	195.633	41975.4	21060.3	0	0	14.0504
Pzh_00276	no	0	0	46.0732							16.5863	19.7981		0.033446	0.301099	FineSilt-ModeratelySorted	1.0625	5900.47	4188.7	4773.48	5259.52	4613.98	417.136	1514.64	0	1555.83	4	39.6884	70478	74627	52448	92657	71.3886	49.1367	5.06605	47.8962	3.82553	44.4596	195.633	41975.4	21060.3	0	0	12.6
Pzh_00277	no	0	0	146.828							52.8582	93.7529		0.0335042	0.286673	FineSilt-ModeratelySorted	3.5	3978.2	3963.19	6463.16	6682.89	3118.03	1997.41	2225.52	0	3867.45	4	45.7936	22017	3603	3749	21871	72.8159	64.7936	1.11203	68.643	4.96139	64.4894	88.5	18086.4	9059.64	0	0	14.0504
Pzh_00278	no	0	0	146.113							52.6008	93.1409		0.0342395	0.293424	VeryFineSilt-PoorlySorted	1.0625	4632.35	4615.59	5827.79	6128.73	3584.5	1179.88	1733.45	0	3092.51	4	40.5456	30372	13878	11774	32476	63.1012	47.9641	2.03268	51.2129	5.28147	46.3249	88.5	18086.4	9059.64	0	0	14.0504
Pzh_00279	no	0	0	151.31							54.4715	97.6121		0.0339639	0.295862	VeryFineSilt-PoorlySorted	1.0625	4876.9	4823.6	5631.52	5989.51	3730.77	775.081	1429.55	0	2661.6	4	40.7354	35837	21399	17274	39962	60.2192	53.9339	1.53567	57.4432	5.04494	52.98	88.5	18086.4	9059.64	0	0	14.0504
Pzh_00280	no	0	0	508.968							183.229	496.985		0.0338452	0.28908	FineSilt-ModeratelySorted	1.0625	4371.76	4352.14	6071.89	6284.31	3511.16	1799.46	2294.72	0	3736.63	4	38.4719	27223	10289	8791	28721	50.8197	54.217	1.04673	58.4746	5.30431	53.7555	88.5	18086.4	9059.64	0	0	12.458
Pzh_00281	no	0	0	119.578							43.0482	71.1807		0.0331936	0.299813	FineSilt-ModeratelySorted	1.0625	5565.03	4732.4	4969.58	5364.19	4383.56	272.58	1658.31	0	2209.63	4	37.6941	57607	56904	39916	74595	59.699	48.0532	5.47417	47.1021	4.52304	42.886	195.633	41975.4	21060.3	0	0	12.458
Pzh_00282	no	0	0	137.296							49.4264	85.6781		0.0336748	0.29317	VeryFineSilt-PoorlySorted	1.0625	4763.29	3192.02	5896.28	6924.06	3298.94	220.24	334.9	0	1861.11	4	50.3723	24598	4399	5627	23370	68.5315	66.8895	1.42703	69.3711	3.90861	66.2475	195.633	41975.4	21060.3	0	0	14.0504
Pzh_00283	no	0	0	75.4386							27.1579	38.3657		0.0336748	0.29317	VeryFineSilt-PoorlySorted	1.0625	4732.77	3181.3	5851.59	6969.66	3264.7	175.581	366.756	0	1879.66	4	50.9386	23966	3809	5083	22692	68.5315	66.8895	1.42703	69.3711	3.90861	66.2475	195.633	41975.4	21060.3	0	0	14.0504
Pzh_00284	no	0	0	137.654							49.5555	85.9785		0.0339798	0.29317	VeryFineSilt-PoorlySorted	1.0625	4693.44	3150.5	5773.11	7043.47	3218.19	98.3748	434.815	0	1897.29	4	51.8488	23798	3691	4845	22644	68.5315	66.8895	1.42703	69.3711	3.90861	66.2475	195.633	41975.4	21060.3	0	0	14.0504
Pzh_00285	no	UXO	boxes with discs	602.258							216.813	622.889		0.0320388	0.299562	FineSilt-PoorlySorted	1.0625	5107.18	1540.73	5527.3	6808.87	4506.98	758.674	1970.29	0	390.832	4	51.0233	31332	11903	12286	30949	72.9756	64.5544	2.2346	65.8051	3.48525	62.8328	195.633	41975.4	21060.3	0	0	6.77674
Pzh_00286	no	UXO	large boxes	71.5873							25.7714	35.761		0.0323418	0.298615	Clay-VeryPoorlySorted	1.0625	4958.39	1477.93	5368.36	6964.29	4436.36	742.017	2016.26	0	472.319	4	49.7252	28506	7764	9566	26704	72.9756	64.5544	2.2346	65.8051	3.48525	62.8328	195.633	41975.4	21060.3	0	0	6.77674
Pzh_00287	yes	UXO	box, open boxes, spilled artillery munition, cartridge	182.245	0.25	1	1.75	1.12	0.93	2	6	9.81	1	0.0349343	0.285812	FineSilt-ModeratelySorted	1.625	5182.47	3896.75	5303.84	5450.01	4418.2	1997.68	2951.19	0	3946.74	4	30.2068	45658	39019	28155	56522	49.4061	40.4084	2.50492	43.8014	5.89786	38.0471	88.5	18086.4	9059.64	0	0	12.458
Pzh_00288	no	0	0	49.1072							17.6786	21.5668		0.031047	0.305208	FineSilt-ModeratelySorted	2.0625	5686.5	1130.07	5438.77	6356.97	5337.03	444.201	2701.49	0	12.7143	4	68.183	44873	31977	26004	50846	88.1112	61.316	3.89244	60.996	3.57242	57.8318	195.633	41975.4	21060.3	0	0	6.77674
Pzh_00289	no	0	0	456.06							164.182	428.929		0.0336939	0.298001	FineSilt-ModeratelySorted	1.0625	5328.59	3888.36	5419.95	5919.67	3995.84	632.826	858.903	0	1732.57	4	41.0435	42837	31421	24267	49991	60.2192	53.0181	2.15713	54.6622	3.80122	51.3854	195.633	41975.4	21060.3	0	0	14.0504
Pzh_00290	no	0	0	149.182							53.7055	95.7749		0.0325554	0.298673	Clay-VeryPoorlySorted	1.0625	5097.41	1688.08	5559.41	6800.35	4399.57	907.696	1821	0	510.81	4	51.8585	31230	11910	12240	30900	72.9756	62.7721	1.89721	63.9387	3.06385	61.424	195.633	41975.4	21060.3	0	0	6.77674
Pzh_00291	no	UXO	boxes with discs	99.1689							35.7008	55.3749		0.033096	0.293649	Clay-VeryPoorlySorted	1.0625	4676.41	1954.89	5232.76	7198.09	3909.23	1186.19	1580.29	0	987.033	4	52.2197	24628	3682	5695	22615	71.0605	70.1046	1.4984	72.3699	3.76376	69.2553	195.633	41975.4	21060.3	0	0	6.77674
Pzh_00292	no	0	0	213.618							76.9024	155.042		0.0320388	0.300306	FineSilt-PoorlySorted	1.0625	5226.29	1659.83	5670.5	6677.54	4526.81	855.227	1882.72	0	392.498	4	52.0885	33755	15550	14802	34503	72.9756	58.7989	3.00363	58.7218	2.92655	56.1906	195.633	41975.4	21060.3	0	0	6.77674
Pzh_00293	no	0	0	56.5927							20.3734	26.0889		0.031975	0.300951	FineSilt-ModeratelySorted	1.0625	5263.41	1417.82	5636.9	6676.3	4720.2	603.812	2137.85	0	178.36	4	51.1095	33529	15093	14721	33901	72.9756	64.5544	2.2346	65.8051	3.48525	62.8328	195.633	41975.4	21060.3	0	0	6.77674
Pzh_00294	no	0	0	309.877							111.556	255.391		0.031975	0.300951	FineSilt-ModeratelySorted	1.0625	5278.6	1428.24	5653.63	6660.05	4726.73	612.308	2133.33	0	173.756	4	51.2874	33548	15086	14721	33913	72.9756	64.5544	2.2346	65.8051	3.48525	62.8328	195.633	41975.4	21060.3	0	0	6.77674
Pzh_00295	no	UXO	0	102.245							36.8083	57.6918		0.0337959	0.28591	FineSand-PoorlySorted	1.0625	3901.55	3846.16	5933.85	7359.65	2517.43	872.976	839.895	0	2823.73	4	58.0635	21111	2135	2187	21059	79.5914	81.6027	1.2119	85.6169	5.22611	81.4146	88.5	18086.4	9059.64	0	0	14.0504
Pzh_00296	no	UXO	munitionboxes / racks with grenades?	133.26							47.9735	82.3161		0.0337959	0.28591	FineSand-PoorlySorted	1.0625	3918.93	3868.63	5964.15	7331.26	2539.76	878.062	828.045	0	2818.17	4	57.7105	21202	2144	2308	21038	79.5914	81.6027	1.2119	85.6169	5.22611	81.4146	88.5	18086.4	9059.64	0	0	14.0504
Pzh_00297	no	UXO	boxes with discs	133.115							47.9213	82.196		0.0323418	0.298615	Clay-VeryPoorlySorted	1.0625	4911.1	1483.72	5324.34	7010.44	4399.11	764.443	2010.59	0	516.046	4	49.594	27830	7161	8912	26079	72.9756	64.5544	2.2346	65.8051	3.48525	62.8328	195.633	41975.4	21060.3	0	0	6.77674
Pzh_00298	no	0	0	298.363							107.411	242.74		0.0317415	0.30286	FineSilt-ModeratelySorted	1.0625	5326.7	1278.82	5655.02	6641.69	4868.31	455.55	2302.62	0	51.785	4	52.2898	35106	16617	16250	35473	72.9756	64.5544	2.2346	65.8051	3.48525	62.8328	195.633	41975.4	21060.3	0	0	6.77674
Pzh_00299	no	UXO	large grenades, broken munition boxes	325.161							117.058	272.432		0.0333818	0.297287	VeryFineSilt-PoorlySorted	1.0625	5147.11	3436.92	5782.73	6336.71	3739.12	817.802	435.034	0	1667.81	4	44.9358	32752	14865	13863	33754	66.1209	59.0067	1.68521	61.0672	3.74571	57.9658	195.633	41975.4	21060.3	0	0	14.0504
Pzh_00300	no	UXO	large grenades, broken munition boxes	352.885							127.039	304.044		0.0333033	0.297287	VeryFineSilt-PoorlySorted	1.0625	5144.75	3396.14	5803.86	6363.22	3730.78	786.426	422.717	0	1652.63	4	45.1087	31548	13189	12659	32078	66.1209	59.0067	1.68521	61.0672	3.74571	57.9658	195.633	41975.4	21060.3	0	0	14.0504
Pzh_00301	no	0	0	335.006							120.602	283.557		0.0333033	0.296657	VeryFineSilt-PoorlySorted	1.0625	5141.67	3356.26	5825.81	6390.39	3721.9	755.759	413.723	0	1638.65	4	45.2661	31676	13190	12680	32186	66.1209	59.0067	1.68521	61.0672	3.74571	57.9658	195.633	41975.4	21060.3	0	0	14.0504
Pzh_00302	no	0	0	484.786							174.523	465.563		0.0336748	0.294418	FineSilt-PoorlySorted	1.0625	4908.35	3046.72	5893.81	6860.49	3434.89	300.656	451.468	0	1699.75	4	49.188	26458	6632	7445	25645	68.5315	66.8895	1.42703	69.3711	3.90861	66.2475	195.633	41975.4	21060.3	0	0	14.0504
Pzh_00303	no	0	0	79.9078							28.7668	41.4457		0.0340308	0.289754	VeryFineSilt-PoorlySorted	1.0625	4515.54	3136.76	5541.1	7292.71	3023.61	151.387	637.63	0	2021.76	4	54.8848	22314	2337	3232	21419	80.0959	83.3068	1.20332	87.373	5.26943	83.1036	195.633	41975.4	21060.3	0	0	14.0504
Pzh_00304	no	UXO	barrel with bolts, boxes with discs, litter	566.172							203.822	573.332		0.0337954	0.292298	FineSilt-PoorlySorted	1.0625	4780.29	3037.1	5741.67	7026.89	3296.91	155.383	515.874	0	1792.75	4	51.4786	23687	3684	4850	22521	68.5315	66.8895	1.42703	69.3711	3.90861	66.2475	195.633	41975.4	21060.3	0	0	14.0504
Pzh_00305	no	0	0	328.261							118.174	275.923		0.0340818	0.289754	VeryFineSilt-PoorlySorted	1.0625	4442.61	3201.9	5531.64	7333.85	2952.87	190.535	643.678	0	2097.18	4	55.2373	21939	2302	3099	21142	80.0959	83.3068	1.20332	87.373	5.26943	83.1036	195.633	41975.4	21060.3	0	0	14.0504
Pzh_00306	no	0	0	200.89							72.3204	142.776		0.0340308	0.289754	VeryFineSilt-PoorlySorted	1.0625	4527.61	3138.78	5559.29	7273.88	3037.02	132.49	620.216	0	2013.77	4	54.6723	22963	2851	3802	22012	80.0959	73.7847	1.26689	77.1653	4.64748	73.4436	195.633	41975.4	21060.3	0	0	14.0504
Pzh_00307	no	0	0	134.972							48.5899	83.7383		0.0345434	0.266218	MediumSilt-ModeratelySorted	1.0625	2812.66	2475.14	4530.25	9005.98	1282.01	304.276	2291.61	0	3624.1	4	91.7027	18050	1840	435	19455	100.15	103.07	1.55885	109.652	8.14056	102.299	88.5	18086.4	9059.64	0	0	14.0504
Pzh_00308	no	UXO	munition boxes	937.503							337.501	1127.9		0.0340157	0.287952	FineSilt-PoorlySorted	1.0625	4040.92	2761.6	4837.84	7854.97	2937.57	746.958	1362.25	0	1958.41	4	61.0864	20581	2083	2021	20643	80.0959	84.8365	1.24935	88.9575	5.37031	84.4849	195.633	41975.4	21060.3	0	0	14.0504
Pzh_00309	no	0	0	175.765							63.2754	119.344		0.0345434	0.266218	MediumSilt-ModeratelySorted	1.0625	2785.18	2457.78	4563.98	8997.29	1253.67	305.815	2290.57	0	3648.31	4	91.6467	18103	1831	436	19498	100.15	103.07	1.55885	109.652	8.14056	102.299	88.5	18086.4	9059.64	0	0	14.0504
Pzh_00310	no	UXO	munition boxes	349.62							125.863	300.275		0.0338733	0.289282	FineSilt-PoorlySorted	1.0625	4523.96	2775.06	5312.06	7379.83	3193.56	442.83	943.994	0	1762.05	4	55.4541	21861	2309	3209	20961	80.0959	75.8432	1.28694	78.9737	4.41739	75.4472	195.633	41975.4	21060.3	0	0	14.0504
Pzh_00311	no	UXO	large munition boxes with discs	516.729							186.022	507.178		0.033517	0.289868	Clay-VeryPoorlySorted	1.0625	4370.59	2298.57	5030.64	7498.14	3472.29	936.694	1411.03	0	1423.5	4	54.1963	22304	2318	3446	21176	71.0605	77.2638	1.27923	80.4158	4.43128	76.7752	195.633	41975.4	21060.3	0	0	14.0504
Pzh_00312	no	0	0	316.342							113.883	262.565		0.0324256	0.306599	FineSilt-PoorlySorted	1.0625	6832.95	3493.59	4168.43	4813.72	5435.29	1642.91	2127.58	0	456.504	4	75.2662	97895	117263	81522	133636	111.509	57.3256	15.7911	50.2632	8.72869	41.9233	195.633	41975.4	21060.3	0	0	12.6
Pzh_00313	no	0	0	39.6426							14.2713	16.1819		0.0326498	0.306871	FineSilt-PoorlySorted	1.0625	7046.22	3543.82	3970.59	4629.36	5647.99	1817.56	2339.92	0	501.886	4	83.0842	109158	134951	92999	151110	111.509	70.3273	29.2767	60.0987	19.0481	41.4417	195.633	41975.4	21060.3	0	0	12.6
Pzh_00314	no	0	0	21.026							7.56936	6.91065		0.0326498	0.306871	FineSilt-PoorlySorted	1.0625	7049.75	3531.64	3972.69	4633.4	5650.17	1827.64	2341.9	0	490.997	4	83.1377	108002	132846	91889	148959	111.509	70.3273	29.2767	60.0987	19.0481	41.4417	195.633	41975.4	21060.3	0	0	12.6
Pzh_00315	no	0	0	89.8803							32.3569	48.5297		0.0326498	0.306871	FineSilt-PoorlySorted	1.0625	7050.76	3520.34	3976.5	4638.8	5650.01	1834.8	2341.6	0	480.58	4	83.0881	104338	127274	88331	143281	111.509	70.3273	29.2767	60.0987	19.0481	41.4417	195.633	41975.4	21060.3	0	0	12.6
Pzh_00316	no	0	0	21.3213							7.6757	7.04121		0.0336939	0.298649	FineSilt-ModeratelySorted	1.0625	5316.54	3925.06	5419.62	5914.01	3989.75	604.599	874.305	0	1761.54	4	40.9954	42837	31421	24267	49991	60.2192	53.0181	2.15713	54.6622	3.80122	51.3854	195.633	41975.4	21060.3	0	0	14.0504
Pzh_00317	no	0	0	319.727							115.102	266.342		0.032603	0.301607	FineSilt-ModeratelySorted	1.0625	5786.45	3723.8	5029.16	5570.75	4431.27	748.215	1184.6	0	1289.57	4	39.0941	56602	53353	38533	71422	71.3886	49.1367	5.06605	47.8962	3.82553	44.4596	195.633	41975.4	21060.3	0	0	12.6
Pzh_00318	no	0	0	72.8776							26.2359	36.6284		0.0336811	0.297696	FineSilt-ModeratelySorted	1.0625	5273.08	4114.66	5403	5870.39	3978.82	467.743	983.512	0	1905.15	4	40.7124	44044	33617	25366	52295	60.2192	49.3363	3.23257	50.1545	4.05078	46.5242	195.633	41975.4	21060.3	0	0	14.0504
Pzh_00319	no	0	0	178.488							64.2557	121.832		0.0342825	0.293396	VeryFineSilt-PoorlySorted	1.0625	4734.75	4263.71	5903.01	6335.7	3460.6	885.722	825.622	0	2374.96	4	43.6089	30290	12453	11363	31380	60.2192	56.7564	1.61944	59.5435	4.40648	55.7691	195.633	41975.4	21060.3	0	0	14.0504
Pzh_00320	no	0	0	100.14							36.0504	56.1036		0.0343265	0.293237	VeryFineSilt-PoorlySorted	1.0625	4749.52	4489.16	5827.56	6229.29	3525.58	822.906	1059.33	0	2499.72	4	42.532	32949	16356	13953	35352	60.2192	50.8924	2.12241	53.3414	4.57144	49.256	195.633	41975.4	21060.3	0	0	14.0504
Pzh_00321	no	0	0	245.17							88.2612	186.519		0.0343961	0.292231	VeryFineSilt-PoorlySorted	1.0625	4566	4547.8	5966.76	6335.9	3389.99	1018.21	1229.23	0	2757.26	4	43.9031	27467	9319	8928	27858	63.1012	53.9339	1.53567	57.4432	5.04494	52.98	88.5	18086.4	9059.64	0	0	14.0504
Pzh_00322	no	0	0	1503.43							541.236	2125.55		0.0341926	0.29401	VeryFineSilt-PoorlySorted	1.0625	4833.36	4729.04	5691.76	6061.91	3665.29	775.332	1323.69	0	2614.79	4	41.612	36013	21422	17266	40169	60.2192	53.9339	1.53567	57.4432	5.04494	52.98	88.5	18086.4	9059.64	0	0	14.0504
Pzh_00323	no	0	0	1553.05							559.098	2220.19		0.034737	0.286106	VeryFineSilt-PoorlySorted	1.0625	3959.19	3941.39	6537.86	6865.8	2844.75	1639.97	1487.07	0	3308.76	4	48.8308	21753	2889	3332	21310	63.1012	68.7367	1.24231	72.4535	4.9591	68.3647	88.5	18086.4	9059.64	0	0	14.0504
Pzh_00326	no	0	0	443.44							159.639	413.081		0.0347448	0.288353	VeryFineSilt-PoorlySorted	1.0625	4053.89	4035.63	6472.33	6824.21	2891.14	1523.11	1314.65	0	3143.78	4	49.3064	22383	2939	3577	21745	63.1012	68.7367	1.24231	72.4535	4.9591	68.3647	88.5	18086.4	9059.64	0	0	14.0504
Pzh_00327	no	0	0	66.6035							23.9773	32.461		0.0344919	0.290994	VeryFineSilt-PoorlySorted	1.0625	4358.82	4340.32	6192.07	6567.67	3162.37	1213.33	1143.37	0	2849.49	4	46.2268	25501	6418	6675	25244	63.1012	61.9593	1.35686	65.4564	4.85394	61.3566	88.5	18086.4	9059.64	0	0	14.0504
Pzh_00328	no	0	0	20.5619							7.4023	6.70678		0.0344919	0.290994	VeryFineSilt-PoorlySorted	1.0625	4365.71	4347.2	6186.62	6563.29	3167.59	1206.26	1136.41	0	2840.58	4	46.1784	25501	6418	6675	25244	63.1012	61.9593	1.35686	65.4564	4.85394	61.3566	88.5	18086.4	9059.64	0	0	14.0504
Pzh_00329	no	0	0	66.8846							24.0784	32.6449		0.0337501	0.28683	FineSilt-ModeratelySorted	1.0625	4444.93	4406.89	6020.98	6190.2	3677.09	2029.09	2602.52	0	3987.44	4	35.4906	27388	11407	9324	29471	52.5213	46.2641	1.08546	50.7839	5.60522	45.5463	88.5	18086.4	9059.64	0	0	12.458
Pzh_00330	no	0	0	37.142							13.3711	14.8274		0.0337501	0.28683	FineSilt-ModeratelySorted	1.0625	4442.61	4403.72	6024.59	6192.1	3678.8	2041.08	2613.95	0	3999.6	4	35.458	27388	11407	9324	29471	52.5213	46.2641	1.08546	50.7839	5.60522	45.5463	88.5	18086.4	9059.64	0	0	12.458
Pzh_00331	no	0	0	36.3071							13.0706	14.3819		0.03283	0.300532	FineSilt-ModeratelySorted	1.0625	5666.4	4597.6	4897.78	5315.8	4456.08	164.021	1615.85	0	2037.62	4	38.5028	61024	62299	43517	79806	59.699	48.0532	5.47417	47.1021	4.52304	42.886	195.633	41975.4	21060.3	0	0	12.6
Pzh_00332	no	0	0	52.2037							18.7933	23.4108		0.0331936	0.299378	FineSilt-ModeratelySorted	1.0625	5488.38	4742.43	5042.37	5432.24	4311.25	296.676	1623.72	0	2258.08	4	37.6617	56149	54346	38404	72091	59.699	47.1779	3.2545	48.7069	4.78345	44.2566	195.633	41975.4	21060.3	0	0	12.458
Pzh_00333	no	0	0	41.7751							15.039	17.3604		0.0331936	0.299378	FineSilt-ModeratelySorted	1.0625	5480.33	4753.94	5048.15	5436.07	4305.76	310.269	1628.74	0	2272.39	4	37.5932	56389	54364	38409	72344	59.699	47.1779	3.2545	48.7069	4.78345	44.2566	195.633	41975.4	21060.3	0	0	12.458
Pzh_00335	no	0	0	30.8244							11.0968	11.5459		0.0305735	0.286017	FineSilt-PoorlySorted	1.625	5586.06	4187.58	2161.01	2583.55	7192.04	2865.94	4199.05	262.465	3039.17	5	261.711	171767	249231	159176	261822	1140.48	279.242	242.059	336.293	299.11	37.2245	36.5	7956.3	4444.58	0	0	17.202
Pzh_00336	no	0	0	27.7826							10.0017	10.0435		0.0305735	0.286017	FineSilt-PoorlySorted	1.625	5587.22	4202.5	2161.82	2586.5	7191.11	2863.66	4194.35	256.352	3028.16	5	268.303	171767	249231	159176	261822	1140.48	279.242	242.059	336.293	299.11	37.2245	36.5	7956.3	4444.58	0	0	17.202
Pzh_00337	no	0	0	67.8479							24.4253	33.2774		0.0282367	0.273702	FineSilt-PoorlySorted	1.625	5382.81	3082.51	2245.95	2509.5	7202.38	3097.05	4539.67	578.238	3844.21	5	267.135	169582	248735	157248	261069	495.517	482.51	444.949	665.89	628.329	37.5623	36.5	7956.3	4444.58	0	0	17.202
Pzh_00338	no	0	0	69.893							25.1615	34.63		0.0245944	0.263586	VeryFineSilt-PoorlySorted	1.625	4875.94	2023.91	1966.21	2077.01	7723.22	3923.99	5374.33	1228.33	4920.7	5	577.125	175554	261412	163805	273161	1265.65	543.268	505.468	765.018	727.218	37.8001	36.5	7956.3	4444.58	0	0	17.202
Pzh_00339	no	0	0	51.8001							18.648	23.1683		0.024683	0.256363	VeryFineSilt-PoorlySorted	1.625	4008.62	2019.66	1126.3	1195.17	8630.11	4805.96	6258.75	2138.96	5662.83	6	2306.36	188519	283385	177599	294305	2616.92	1043.32	996.527	1557.64	1510.85	46.796	36.5	7956.3	4444.58	0	0	17.202
Pzh_00340	no	0	0	519.972							187.19	511.454		0.0203863	0.249431	MediumSilt-PoorlySorted	2.875	4479.71	248.126	1937.47	1760.45	8554.73	5433.66	6813.13	1975.09	6762.64	6	404.78	178486	267129	167290	278325	1522.86	525.024	488.944	750.298	714.218	36.0799	48.5333	10311.5	5189.51	0	0	12.5281
Pzh_00341	no	0	0	101.479							36.5325	57.1125		0.0208497	0.242586	MediumSand-VeryWellSorted	2.875	3653.76	1252.69	884.404	770.465	9323.87	5830.73	7266.16	2827.85	6885.99	6	3029.51	189407	287076	178923	297560	2889.11	1253.88	1201.74	1894.8	1842.65	52.1417	36.5	7956.3	4444.58	0	0	12.5281
Pzh_00342	no	0	0	76.728							27.6221	39.2481		0.0226757	0.237952	FineSand-VeryPoorlySorted	4.625	3287.9	888.453	770.096	566.474	9707.35	6369.47	7790.73	3161.62	7495.13	6	4394.28	185534	281049	175578	291005	4278.92	1253.44	1199.56	1919.05	1865.17	53.8792	48.5333	10311.5	5189.51	0	0	12.5281
Pzh_00343	no	0	0	82.4185							29.6707	43.2023		0.0254701	0.238481	MediumSand-ModeratelySorted	2.875	4057.76	0	1709.51	1402.18	9239.6	6334.27	7687.55	2519.42	7709.84	6	997.872	179419	270259	168763	280915	3212.65	786.142	742.797	1198.49	1155.14	43.345	48.5333	10311.5	5189.51	0	0	12.5281
Pzh_00344	no	0	0	1016.55							365.958	1257.3		0.022511	0.237403	MediumSand-ModeratelySorted	2.875	3995.69	0	1652.73	1338.56	9315.68	6408.14	7747.24	2590.98	7777.96	6	1152.47	180918	272703	170294	283327	3212.65	786.142	742.797	1198.49	1155.14	43.345	48.5333	10311.5	5189.51	0	0	12.5281
Pzh_00345	no	0	0	957.306							344.63	1159.98		0.022511	0.238476	MediumSand-ModeratelySorted	2.875	3927.25	0	1587.01	1269.13	9387.28	6468.9	7790.6	2663.33	7829.59	6	1329.27	180764	272684	170280	283168	3212.65	786.142	742.797	1198.49	1155.14	43.345	48.5333	10311.5	5189.51	0	0	12.5281
Pzh_00346	no	0	0	787.025							283.329	891.915		0.0254701	0.237403	MediumSand-ModeratelySorted	2.875	4050.69	0	1707.39	1393.52	9267.16	6374.47	7702.1	2537.8	7753.64	6	1012.29	181009	272712	170295	283426	3212.65	786.142	742.797	1198.49	1155.14	43.345	48.5333	10311.5	5189.51	0	0	12.5281
Pzh_00347	no	0	0	787.332							283.439	892.382		0.022511	0.237403	MediumSand-ModeratelySorted	2.875	4014.32	0	1679.19	1352.72	9341.41	6465.97	7684.22	2596.33	7847.78	6	1079.8	178908	269572	168411	280069	3212.65	545.672	509.495	831.673	795.495	36.1771	48.5333	10311.5	5189.51	0	0	12.5281
Pzh_00348	no	0	0	233.252							83.9706	174.456		0.0254701	0.238481	MediumSand-ModeratelySorted	2.875	4099.73	0	1747.99	1444.86	9189.76	6286.85	7639.04	2472.01	7666.64	6	893.877	175956	265036	165473	275519	1522.86	786.142	742.797	1198.49	1155.14	43.345	48.5333	10311.5	5189.51	0	0	12.5281
Pzh_00349	no	0	0	123.932							44.6155	74.6792		0.0217084	0.219778	MediumSilt-PoorlySorted	7	2045.81	1326.45	412.695	663.913	11367.1	8349.22	9207.05	4784.36	9485.43	0	4608.7	183953	276736	174828	285861	4451.02	1757.31	1689.33	2796.75	2728.77	67.974	0	0	0	0.16	0	0
Pzh_00350	no	0	0	60.3226							21.7162	28.4215		0.0203131	0.221	VeryFineSand-ModeratelySorted	5.3125	3107.12	150.297	108.709	292.862	9890.58	7921.8	7774.17	4017.17	9895.31	0	3579.27	165041	246354	156055	255340	4673.44	1441.51	1374.82	2283.94	2217.25	66.6903	0	0	0	0.16	1.8	0
Pzh_00351	no	0	0	105.021							37.8077	59.8032		0.0337954	0.292298	FineSilt-PoorlySorted	1.0625	4677.19	3046.71	5630.83	7153.56	3187.23	93.3946	584.291	0	1872.59	4	53.1805	23951	3729	4859	22821	80.0959	66.8895	1.42703	69.3711	3.90861	66.2475	195.633	41975.4	21060.3	0	0	14.0504
Pzh_00352	no	0	0	128.09							46.1125	78.0604		0.0336378	0.285479	VeryFineSand-PoorlySorted	1.0625	4080.85	3610.29	5603.83	7467.36	2619.34	509.901	727.483	0	2504.82	4	57.7851	21383	2189	2443	21129	68.5315	73.7847	1.26689	77.1653	4.64748	73.4436	195.633	41975.4	21060.3	0	0	14.0504
Pzh_00353	no	0	0	28.7073							10.3346	10.4946		0.0336378	0.285479	VeryFineSand-PoorlySorted	1.0625	4083.28	3564.05	5545.7	7505.52	2613.2	499.329	758.409	0	2483.97	4	58.1934	21073	2094	2234	20933	80.0959	73.7847	1.26689	77.1653	4.64748	73.4436	195.633	41975.4	21060.3	0	0	14.0504
Pzh_00354	no	0	0	80.2556							28.892	41.6879		0.0338056	0.295742	VeryFineSilt-PoorlySorted	1.0625	4967.15	3713.15	5854.07	6366.73	3595.45	885.251	415.4	0	1927.19	4	45.6877	31498	13323	12359	32462	68.5315	53.0181	2.15713	54.6622	3.80122	51.3854	195.633	41975.4	21060.3	0	0	14.0504
Pzh_00355	no	0	0	43.0886							15.5119	18.0967		0.0343681	0.293237	VeryFineSilt-PoorlySorted	1.0625	4573.08	4528.55	5997.66	6390.88	3355.09	998.968	1056.27	0	2641.34	4	44.0617	27878	9409	9150	28137	60.2192	61.9593	1.35686	65.4564	4.85394	61.3566	88.5	18086.4	9059.64	0	0	14.0504
Pzh_00356	no	0	0	36.5607							13.1618	14.5169		0.0341993	0.287015	VeryFineSilt-PoorlySorted	1.0625	4056.52	4037.11	6442.58	6983.21	2781.89	1208.63	959.48	0	2911.82	4	53.67	22702	2858	3515	22045	79.5914	71.4618	1.28564	75.0536	4.87742	71.0831	88.5	18086.4	9059.64	0	0	14.0504
Pzh_00357	no	UXO	0	71.9937							25.9177	36.0336		0.0336611	0.28591	FineSand-PoorlySorted	1.0625	3963.38	3896.5	5915.89	7333.63	2568.51	795.866	771.546	0	2748.44	4	57.3429	21021	2129	2303	20847	79.5914	81.6027	1.2119	85.6169	5.22611	81.4146	88.5	18086.4	9059.64	0	0	14.0504
Pzh_00358	no	0	0	28.9608							10.4259	10.6191		0.0340308	0.290879	FineSilt-PoorlySorted	1.0625	4606.28	3008.22	5491.13	7288.17	3105.98	198.675	710.349	0	1911.85	4	54.8234	22934	2855	3811	21978	80.0959	75.8432	1.28694	78.9737	4.41739	75.4472	195.633	41975.4	21060.3	0	0	14.0504
Pzh_00359	no	0	0	20.9665							7.54795	6.88443		0.0338493	0.295742	VeryFineSilt-PoorlySorted	1.0625	4966.78	3771.79	5831.13	6335.84	3605.13	938.435	465.705	0	1954.76	4	45.2917	33234	15714	13929	35019	68.5315	53.0181	2.15713	54.6622	3.80122	51.3854	195.633	41975.4	21060.3	0	0	14.0504
Pzh_00360	no	0	0	62.267							22.4161	29.6573		0.0338648	0.291808	FineSilt-PoorlySorted	1.0625	4731.44	2878.87	5534.49	7185.75	3265.31	264.32	734.051	0	1749.78	4	53.4196	23106	3219	4325	22000	80.0959	75.8432	1.28694	78.9737	4.41739	75.4472	195.633	41975.4	21060.3	0	0	14.0504
Pzh_00361	no	0	0	66.7489							24.0296	32.5561		0.0338648	0.291808	FineSilt-PoorlySorted	1.0625	4756.94	2855.63	5552.46	7156.71	3302.42	284.088	736.4	0	1714.54	4	53.0108	23848	3703	4891	22660	80.0959	75.8432	1.28694	78.9737	4.41739	75.4472	195.633	41975.4	21060.3	0	0	14.0504
Pzh_00362	no	0	0	48.6736							17.5225	21.3117		0.0338648	0.291808	FineSilt-PoorlySorted	1.0625	4728.4	2844.09	5522.87	7183.9	3288.89	298.378	761.287	0	1719.69	4	53.3499	23407	3241	4490	22158	80.0959	75.8432	1.28694	78.9737	4.41739	75.4472	195.633	41975.4	21060.3	0	0	14.0504
Pzh_00363	no	0	0	37.3901							13.4604	14.9604		0.0337072	0.291808	FineSilt-PoorlySorted	1.0625	4807.25	2824.1	5591.43	7101.6	3365.39	318.267	735.58	0	1657.48	4	52.2343	24343	3832	5264	22911	80.0959	75.8432	1.28694	78.9737	4.41739	75.4472	195.633	41975.4	21060.3	0	0	14.0504
Pzh_00364	no	0	0	57.8983							20.8434	26.8995		0.0338648	0.291808	FineSilt-PoorlySorted	1.0625	4682.17	2852.13	5481.58	7231.58	3247.75	301.918	783.675	0	1751.86	4	53.9638	23106	3219	4325	22000	80.0959	75.8432	1.28694	78.9737	4.41739	75.4472	195.633	41975.4	21060.3	0	0	14.0504
Pzh_00366	no	0	0	545.863							196.511	545.91		0.0340308	0.289754	VeryFineSilt-PoorlySorted	1.0625	4471.44	3184.32	5546.04	7309.79	2981.94	167.894	629.337	0	2070.3	4	55.0223	22165	2321	3231	21255	80.0959	73.7847	1.26689	77.1653	4.64748	73.4436	195.633	41975.4	21060.3	0	0	14.0504
Pzh_00367	no	0	0	447.186							160.987	417.769		0.0340308	0.288735	FineSilt-PoorlySorted	1.0625	4443.94	3167.18	5487.02	7365.54	2949.54	225.106	688.231	0	2083.86	4	55.6175	21994	2298	3050	21242	80.0959	83.3068	1.20332	87.373	5.26943	83.1036	195.633	41975.4	21060.3	0	0	14.0504
Pzh_00368	no	UXO	boxes with grenades	26.0871							9.39134	9.22983		0.0340818	0.287479	VeryFineSilt-PoorlySorted	1.0625	4348.09	3286.87	5520.57	7387.48	2861.38	255.506	664.62	0	2194.96	4	55.5182	21939	2306	2977	21268	80.0959	83.3068	1.20332	87.373	5.26943	83.1036	195.633	41975.4	21060.3	0	0	14.0504
Pzh_00369	no	0	0	62.0287							22.3303	29.5051		0.0336418	0.293828	VeryFineSilt-PoorlySorted	1.0625	4826.78	3259.04	6032.82	6799.46	3376.22	345.851	235.917	0	1839.47	4	49.0208	26464	6698	7350	25812	68.5315	66.8895	1.42703	69.3711	3.90861	66.2475	195.633	41975.4	21060.3	0	0	14.0504
Pzh_00370	no	UXO	mixed boxes, grenades	229.775							82.719	170.976		0.0340818	0.289754	VeryFineSilt-PoorlySorted	1.0625	4375.1	3286.71	5555.54	7349.35	2891.1	220.175	627.509	0	2175.97	4	55.1097	22096	2302	3097	21301	80.0959	73.7847	1.26689	77.1653	4.64748	73.4436	195.633	41975.4	21060.3	0	0	14.0504
Pzh_00371	no	0	0	89.2875							32.1435	48.1007		0.0336378	0.285479	VeryFineSand-PoorlySorted	1.0625	4157.54	3569.57	5646.66	7397.38	2697.58	439.189	652.795	0	2436.79	4	56.4415	21692	2229	2703	21218	68.5315	73.7847	1.26689	77.1653	4.64748	73.4436	195.633	41975.4	21060.3	0	0	14.0504
Pzh_00372	no	UXO	0	289.3							104.148	232.899		0.0338679	0.287479	VeryFineSand-PoorlySorted	1.0625	4212.61	3422.49	5524.39	7452.71	2732.84	371.916	704.298	0	2340.22	4	56.6926	21580	2226	2630	21176	80.0959	73.7847	1.26689	77.1653	4.64748	73.4436	195.633	41975.4	21060.3	0	0	14.0504
Pzh_00373	no	0	0	104.877							37.7556	59.6926		0.0339264	0.285904	VeryFineSilt-PoorlySorted	1.0625	3914.92	3888.3	6206.14	7197.15	2597.14	1093.31	937.891	0	2940.51	4	57.2643	21355	2105	2361	21099	79.5914	71.4618	1.28564	75.0536	4.87742	71.0831	88.5	18086.4	9059.64	0	0	14.0504
Pzh_00374	no	UXO	long grenades sticking in the ground	30.0864							10.8311	11.1765		0.0339264	0.287017	VeryFineSilt-PoorlySorted	1.0625	4021.16	3986.14	6152.92	7160.32	2674.23	941.447	788.803	0	2794.31	4	56.2893	21177	2126	2483	20820	79.5914	71.4618	1.28564	75.0536	4.87742	71.0831	88.5	18086.4	9059.64	0	0	14.0504
Pzh_00375	no	0	0	212.002							76.3208	153.471		0.034117	0.285922	FineSilt-PoorlySorted	1.0625	3962.87	2763.15	4760.11	7931.28	2905.35	668.277	1435.8	0	1994.07	4	62.4792	20566	2114	1954	20726	80.0959	84.8365	1.24935	88.9575	5.37031	84.4849	195.633	41975.4	21060.3	0	0	14.0504
Pzh_00376	no	0	0	125							44.9998	75.5437		0.034117	0.285922	FineSilt-ModeratelySorted	1.0625	3941.26	2763.93	4738.57	7952.41	2896.78	646.48	1456.29	0	2004.35	4	62.8775	20461	2108	1953	20616	80.0959	84.8365	1.24935	88.9575	5.37031	84.4849	195.633	41975.4	21060.3	0	0	14.0504
Pzh_00377	no	0	0	316.325							113.877	262.545		0.0337161	0.281877	FineSand-PoorlySorted	1.0625	3529.53	3488.88	5868.19	7629.74	2174.57	1216.02	1220.86	0	3196.6	4	61.8783	20055	1927	1414	20568	79.5914	90.1052	1.23628	94.4065	5.53759	89.9393	88.5	18086.4	9059.64	0	0	14.0504
Pzh_00378	no	0	0	23.3143							8.39315	7.93808		0.0334264	0.284093	FineSand-PoorlySorted	1.0625	3650.98	3579.88	5748.87	7622.77	2251.66	1022.27	1079.05	0	3015.8	4	62.4082	20339	1954	1566	20727	79.5914	81.6027	1.2119	85.6169	5.22611	81.4146	88.5	18086.4	9059.64	0	0	14.0504
Pzh_00379	no	0	0	26.3636							9.49089	9.36134		0.0334264	0.284093	FineSand-PoorlySorted	1.0625	3651.47	3578.51	5741.57	7626.88	2250.42	1018.18	1078.37	0	3012.34	4	62.4767	20339	1954	1566	20727	79.5914	81.6027	1.2119	85.6169	5.22611	81.4146	88.5	18086.4	9059.64	0	0	14.0504
Pzh_00380	no	0	0	309.375							111.375	254.836		0.0350002	0.280123	FineSand-PoorlySorted	1.0625	3488.01	3459.01	5984.17	7593.41	2172.76	1335.81	1300.46	0	3296.42	4	61.5355	20041	1922	1415	20548	79.5914	79.6999	1.25926	83.4861	5.04546	79.4419	88.5	18086.4	9059.64	0	0	14.0504
Pzh_00381	no	0	0	149.967							53.9883	96.452		0.0346056	0.281745	VeryFineSilt-PoorlySorted	1.0625	3543.9	3525.75	6549.94	7292.27	2418.59	1791.31	1611.71	0	3572.29	4	57.9256	20637	2022	1827	20832	79.5914	77.0623	1.23052	80.6353	4.80352	76.805	88.5	18086.4	9059.64	0	0	14.0504
Pzh_00382	no	0	0	21.6311							7.7872	7.1788		0.0341632	0.283684	FineSand-PoorlySorted	1.0625	3768.93	3749.31	6235.41	7276.34	2483.37	1261.54	1118.55	0	3119.85	4	58.373	21010	2056	2151	20915	79.5914	79.6999	1.25926	83.4861	5.04546	79.4419	88.5	18086.4	9059.64	0	0	14.0504
Pzh_00383	no	0	0	35.7614							12.8741	14.0926		0.0340077	0.283684	FineSand-PoorlySorted	1.0625	3675.35	3649.46	6102.22	7407.05	2365.65	1235.93	1146.69	0	3152.2	4	59.8032	20592	2040	1765	20867	79.5914	79.6999	1.25926	83.4861	5.04546	79.4419	88.5	18086.4	9059.64	0	0	14.0504
Pzh_00384	no	0	0	30.3031							10.9091	11.2846		0.0340077	0.283684	FineSand-PoorlySorted	1.0625	3677.46	3652.28	6111.43	7400.81	2370.14	1241.5	1148.93	0	3154.67	4	59.7646	20728	2061	1913	20876	79.5914	79.6999	1.25926	83.4861	5.04546	79.4419	88.5	18086.4	9059.64	0	0	14.0504
Pzh_00385	no	0	0	32.6819							11.7655	12.4888		0.0340818	0.288735	VeryFineSilt-PoorlySorted	1.0625	4361.67	3256.98	5498.37	7396.72	2871.91	257.272	682.816	0	2174.42	4	55.6387	22012	2297	3024	21285	80.0959	83.3068	1.20332	87.373	5.26943	83.1036	195.633	41975.4	21060.3	0	0	14.0504
Pzh_00386	no	0	0	64.3982							23.1834	31.0272		0.0337093	0.291376	VeryFineSilt-PoorlySorted	1.0625	4538.37	3528.66	6022.47	6948.43	3108.94	374.098	204.218	0	2157.94	4	51.0997	24145	3863	5038	22970	68.5315	73.7847	1.26689	77.1653	4.64748	73.4436	195.633	41975.4	21060.3	0	0	14.0504
Pzh_00387	no	0	0	56.5233							20.3484	26.0459		0.0337093	0.291376	VeryFineSilt-PoorlySorted	1.0625	4540.42	3505.88	6000.42	6961.85	3107.23	348.292	213.001	0	2146.88	4	51.2164	24086	3860	5037	22909	68.5315	73.7847	1.26689	77.1653	4.64748	73.4436	195.633	41975.4	21060.3	0	0	14.0504
Pzh_00388	no	0	0	43.5927							15.6934	18.3813		0.0339798	0.29317	VeryFineSilt-PoorlySorted	1.0625	4660.18	3189.21	5779.85	7054.1	3187.62	90.6837	414.444	0	1935.81	4	52.0261	23967	3693	4849	22811	68.5315	66.8895	1.42703	69.3711	3.90861	66.2475	195.633	41975.4	21060.3	0	0	14.0504
Pzh_00389	no	0	0	25.1786							9.0643	8.80117		0.0340281	0.289754	VeryFineSilt-PoorlySorted	1.0625	4420.98	3306.39	5638.36	7268.33	2944.49	160.85	543.196	0	2151.13	4	54.309	22251	2329	3243	21337	68.5315	73.7847	1.26689	77.1653	4.64748	73.4436	195.633	41975.4	21060.3	0	0	14.0504
Pzh_00390	no	0	0	61.2106							22.0358	28.9843		0.0339798	0.292298	FineSilt-PoorlySorted	1.0625	4657.95	3049.82	5610.96	7176.71	3166.85	96.2571	598.33	0	1887.84	4	53.4803	23789	3705	4735	22759	80.0959	66.8895	1.42703	69.3711	3.90861	66.2475	195.633	41975.4	21060.3	0	0	14.0504
Pzh_00391	no	UXO	0	21.1342							7.60831	6.9584		0.0340818	0.28654	VeryFineSand-PoorlySorted	1.0625	4237.29	3361.37	5473.88	7475.79	2750.3	361.86	735.299	0	2299.8	4	56.7945	21284	2140	2496	20928	80.0959	83.3068	1.20332	87.373	5.26943	83.1036	195.633	41975.4	21060.3	0	0	14.0504
Pzh_00394	no	UXO	long boxes, V1 war heads	124.085							44.6706	74.8031		0.0363414	0.272112	FineSand-PoorlySorted	4.0625	2770.85	2751.13	5822.41	8179.87	1532.1	1437.35	2009.67	0	3971.29	4	78.5846	19196	1787	696	20287	95.9154	98.8448	1.34561	103.217	5.71756	98.5738	88.5	18086.4	9059.64	0	2.45	14.0504
Pzh_00395	no	0	0	85.6895							30.8482	45.5182		0.0346818	0.267943	MediumSilt-ModeratelySorted	4.0625	2582.42	2531.62	5466.64	8506.72	1228.08	1074.18	2147.33	0	4002.62	4	88.8396	18856	1806	544	20118	106.846	104.087	1.40072	109.487	6.80047	103.671	88.5	18086.4	9059.64	0	2.45	14.0504
Pzh_00701	no	0	0	20.3971							7.34295	6.63473		0.0340515	0.294596	VeryFineSilt-PoorlySorted	1.0625	4807.19	4287.47	5821.95	6252.75	3540	803.588	876.179	0	2336.83	4	42.7087	31765	14997	13023	33739	60.2192	56.7564	1.61944	59.5435	4.40648	55.7691	195.633	41975.4	21060.3	0	0	14.0504
Pzh_00987	no	0	0	20.166							7.25975	6.53407		0.0331989	0.294418	FineSilt-PoorlySorted	1.0625	5040.82	2952.95	5933.59	6774.91	3564.23	423.029	542.666	0	1565.74	4	47.7838	27403	7363	8256	26510	66.1209	66.8895	1.42703	69.3711	3.90861	66.2475	195.633	41975.4	21060.3	0	0	14.0504
Pzh_00988	no	0	0	20.1342							7.24833	6.52028		0.0331989	0.295663	FineSilt-PoorlySorted	1.0625	5063.85	2980.51	5985.74	6727.23	3591.74	455.694	521.449	0	1557.34	4	47.175	28304	8373	9064	27613	66.1209	66.8895	1.42703	69.3711	3.90861	66.2475	195.633	41975.4	21060.3	0	0	14.0504
Pzh_01054	no	0	0	20.4792							7.37252	6.67061		0.0338273	0.292728	VeryFineSilt-PoorlySorted	1.0625	4604.14	3641.21	6202.06	6798.55	3199.66	543.658	160.477	0	2160.23	4	50.3977	25091	5066	6128	24029	68.5315	64.5612	1.40605	67.5555	4.4003	63.9369	195.633	41975.4	21060.3	0	0	14.0504
Pzh_01068	no	0	0	20.4068							7.34645	6.63898		0.0325554	0.299331	FineSilt-PoorlySorted	1.0625	5148.25	1724.99	5616.81	6746.54	4416.44	934.547	1794.89	0	502.591	4	52.0886	31642	12380	12658	31364	72.9756	62.7721	1.89721	63.9387	3.06385	61.424	195.633	41975.4	21060.3	0	0	6.77674
Pzh_01080	no	0	0	22.6734							8.16241	7.64666		0.031975	0.30286	FineSilt-ModeratelySorted	1.0625	5398.07	1319.9	5701.48	6566.99	4907.86	495.273	2297.16	0	0	4	54.0736	35591	17085	16690	35986	72.9756	64.5544	2.2346	65.8051	3.48525	62.8328	195.633	41975.4	21060.3	0	0	6.77674
Pzh_01082	no	0	0	76.9048							27.6857	39.3695		0.031975	0.30286	FineSilt-ModeratelySorted	1.0625	5334.54	1346.31	5681.11	6621.39	4831.15	523.377	2239	0	65.7122	4	51.9626	34985	16679	16182	35482	72.9756	64.5544	2.2346	65.8051	3.48525	62.8328	195.633	41975.4	21060.3	0	0	6.77674
Pzh_01456	no	0	0	216.79							78.0443	158.139		0.0334939	0.263202	MediumSilt-ModeratelySorted	4.0625	2698.63	2352.36	4501.71	9109.54	1170.31	190.615	2405.89	0	3743.11	4	94.356	17774	1816	419	19171	94.9018	95.5008	1.78664	103.172	9.45833	94.243	88.5	18086.4	9059.64	0	2.45	14.0504
Pzh_01769	no	0	0	274.595							98.8541	217.155		0.0338833	0.288657	FineSilt-PoorlySorted	1.0625	4311.46	2695.81	5085.97	7581.6	3124.65	649.116	1158.74	0	1785.88	4	56.8804	21597	2251	2858	20990	80.0959	84.8365	1.24935	88.9575	5.37031	84.4849	195.633	41975.4	21060.3	0	0	14.0504
Pzh_01776	no	0	0	32.1375							11.5695	12.2105		0.0338733	0.289282	FineSilt-PoorlySorted	1.0625	4441.69	2742.86	5224.8	7457.84	3164.89	520.228	1026.1	0	1771.58	4	55.9494	21629	2241	2929	20941	80.0959	75.8432	1.28694	78.9737	4.41739	75.4472	195.633	41975.4	21060.3	0	0	14.0504
Pzh_01950	no	0	0	217.022							78.1278	158.366		0.0345434	0.263202	MediumSilt-ModeratelySorted	4.0625	2676.33	2345.72	4552.6	9083.05	1145.69	214.38	2389.46	0	3759.36	4	93.9993	17785	1806	417	19174	94.9018	103.07	1.55885	109.652	8.14056	102.299	88.5	18086.4	9059.64	0	2.45	14.0504
Pzh_02216	no	0	0	23.2796							8.38065	7.92222		0.0330402	0.277447	FineSand-VeryPoorlySorted	3.5	3124.54	3107.71	6615.65	7598.84	2164.36	2229.7	2129.74	0	4104.67	4	64.7007	19674	1821	1097	20398	95.9154	86.7043	1.30274	90.1813	4.77973	86.4691	88.5	18086.4	9059.64	0	2.45	14.0504
Pzh_02217	no	0	0	20.0387							7.21395	6.47882		0.0330402	0.27541	FineSand-VeryPoorlySorted	3.5	3143.06	3125.78	6539.78	7606.38	2137.04	2159.65	2040.54	0	4024.26	4	65.5685	19948	1848	1180	20616	95.9154	89.0561	1.31492	92.7734	5.03222	88.8049	88.5	18086.4	9059.64	0	2.45	14.0504
Pzh_02219	yes	UXO	boxes	418.291	1.5	1	1.5	1.2	0.88	2.25	71.33	116.625	1.75	0.0306395	0.305208	FineSilt-ModeratelySorted	2.0625	5720.03	1070.85	5415.78	6347.77	5418.44	442.753	2798.67	0	58.1254	4	69.4986	46062	34109	27171	53000	88.1112	61.0889	7.31566	57.7163	3.94311	54.1127	195.633	41975.4	21060.3	0	2.6	6.77674
Pzh_02223	no	0	0	98.1649							35.3394	54.624		0.034592	0.263704	FineSand-VeryPoorlySorted	3.5	2347.14	2331.7	6433.76	8311.2	1650.1	2091.68	2823.81	0	4829.76	4	91.7899	18818	1692	522	19988	113.907	108.296	1.64716	112.683	6.0346	107.796	88.5	18086.4	9059.64	0	2.45	14.0504
Pzh_02224	no	0	0	21.3189							7.6748	7.04011		0.0351604	0.263704	FineSand-VeryPoorlySorted	3.5	2350.92	2335.66	6458.22	8303.7	1670.06	2117.7	2840.98	0	4846.95	4	91.781	19030	1720	528	20222	113.907	108.296	1.64716	112.683	6.0346	107.796	88.5	18086.4	9059.64	0	2.45	14.0504
Pzh_02226	no	UXO	0	133.672							48.1218	82.6578		0.0355861	0.26609	MediumSilt-ModeratelySorted	3.5	2244.49	2227.23	6133.87	8471.16	1384.71	1789.79	2712.04	0	4702.61	4	91.8467	18895	1719	525	20089	113.907	112.77	1.79028	118.003	7.02329	112.014	88.5	18086.4	9059.64	0	2.45	14.0504
Pzh_02235	no	UXO	boxes	130.88							47.1168	80.3499		0.0343649	0.266311	MediumSilt-ModeratelySorted	4.0625	2483.49	2378.04	5218.61	8729.7	1049.19	824.213	2267.17	0	4016.51	4	94.317	18474	1767	499	19742	106.846	108.052	1.60984	113.687	7.24395	107.36	88.5	18086.4	9059.64	0	2.45	14.0504
Pzh_02237	no	UXO	boxes, grenades	114.741							41.3067	67.3442		0.0343619	0.266311	MediumSilt-ModeratelySorted	4.0625	2481.47	2362.85	5179.55	8756.55	1034.8	785.153	2277.06	0	4007.51	4	94.3568	18368	1763	481	19650	106.846	108.052	1.60984	113.687	7.24395	107.36	88.5	18086.4	9059.64	0	2.45	14.0504
Pzh_02239	no	UXO	boxes	240.653							86.6352	181.924		0.0339571	0.266311	MediumSilt-ModeratelySorted	4.0625	2571.24	2455.57	5209.11	8672.59	1127.7	818.736	2184.18	0	3928.02	4	92.1213	18507	1774	512	19769	106.846	104.087	1.40072	109.487	6.80047	103.671	88.5	18086.4	9059.64	0	2.45	14.0504
Pzh_02240	no	UXO	boxes	225							80.9999	166.226		0.0339571	0.266311	MediumSilt-ModeratelySorted	4.0625	2601.79	2495.59	5245.55	8627.27	1167.11	857.853	2147.57	0	3908.61	4	91.0299	18564	1776	513	19827	106.846	104.087	1.40072	109.487	6.80047	103.671	88.5	18086.4	9059.64	0	2.45	14.0504
Pzh_02241	no	0	0	226.258							81.453	167.475		0.0339571	0.266311	MediumSilt-ModeratelySorted	4.0625	2540.65	2433.14	5226.26	8683.46	1104.53	833.463	2210.31	0	3962.88	4	92.8663	18564	1776	513	19827	106.846	104.087	1.40072	109.487	6.80047	103.671	88.5	18086.4	9059.64	0	2.45	14.0504
Pzh_02242	no	0	0	71.9311							25.8952	35.9916		0.0346818	0.266327	MediumSilt-ModeratelySorted	4.0625	2440.21	2388.36	5427.79	8633.42	1091.41	1035.09	2289.5	0	4128.03	4	92.5734	18559	1767	501	19825	106.846	108.052	1.60984	113.687	7.24395	107.36	88.5	18086.4	9059.64	0	2.45	14.0504
Pzh_02243	no	0	0	49.2346							17.7245	21.6419		0.0346818	0.267943	MediumSilt-ModeratelySorted	4.0625	2554.77	2503.1	5452.72	8534.86	1198.93	1059.13	2174.93	0	4024.68	4	89.7474	18856	1806	544	20118	106.846	108.052	1.60984	113.687	7.24395	107.36	88.5	18086.4	9059.64	0	2.45	14.0504
Pzh_02244	no	0	0	37.0034							13.3212	14.7532		0.034955	0.262617	MediumSilt-ModeratelySorted	4.0625	2115.17	2095.71	5709.7	8736.19	1015.52	1376.03	2656.63	0	4570.91	4	98.1164	18443	1717	446	19714	106.846	112.77	1.79028	118.003	7.02329	112.014	88.5	18086.4	9059.64	0	2.45	14.0504
Pzh_02245	no	UXO	long boxes, V1 war heads	1326.38							477.495	1796.63		0.0355615	0.272112	MediumSilt-ModeratelySorted	4.0625	2706.42	2686.31	5778.11	8249.24	1462.51	1388.56	2064.23	0	4015.01	4	80.6979	19136	1781	681	20236	95.9154	98.8448	1.34561	103.217	5.71756	98.5738	88.5	18086.4	9059.64	0	2.45	14.0504
Pzh_02247	no	UXO	Lange Kisten, Artilleriegeschosse	1190.24							428.485	1553.65		0.0303428	0.266152	MediumSilt-ModeratelySorted	1.0625	2853.06	2550.24	4023	9306.33	1548.26	496.81	2555.37	0	3544.91	4	96.1094	17244	1854	393	18705	100.15	99.5292	1.74193	107.063	9.27554	98.3988	88.5	18086.4	9059.64	0	0	14.0504
Pzh_02248	no	UXO	0	177.126							63.7655	120.586		0.0351604	0.260184	FineSand-VeryPoorlySorted	3.5	2324.67	2301.03	6383.2	8312.14	1765.3	2272.26	2995.54	0	4999.97	4	92.9908	19286	1740	536	20490	113.907	108.296	1.64716	112.683	6.0346	107.796	88.5	18086.4	9059.64	0	2.45	14.0504
Pzh_02249	no	UXO	0	132.933							47.8558	82.0453		0.0355328	0.261538	FineSilt-ModeratelySorted	3.5	2309.03	2277.03	6322.28	8324.2	1804.23	2337.12	3067.96	0	5071.24	4	93.2746	19295	1753	535	20513	113.907	115.952	1.86715	121.471	7.38691	115.258	88.5	18086.4	9059.64	0	2.45	178.848
Pzh_02250	no	UXO	0	286.818							103.254	230.222		0.0355328	0.261538	FineSilt-ModeratelySorted	3.5	2324.12	2290.82	6326.66	8308.82	1822.82	2353.15	3069.19	0	5071.63	4	92.4812	19295	1753	535	20513	113.907	115.952	1.86715	121.471	7.38691	115.258	88.5	18086.4	9059.64	0	2.45	178.848
Pzh_02251	no	UXO	0	173.077							62.3077	116.902		0.0355328	0.261538	FineSilt-ModeratelySorted	3.5	2299.93	2262.91	6285.45	8332.38	1827.85	2375.71	3111.71	0	5114.21	4	93.2781	19197	1738	531	20404	113.907	115.952	1.86715	121.471	7.38691	115.258	88.5	18086.4	9059.64	0	2.45	178.848
Pzh_02252	no	UXO	long thin boxes, sticking in the ground	183.993							66.2376	126.9		0.0344979	0.261538	FineSilt-ModeratelySorted	3.5	2358.73	2316.47	6301.67	8273.54	1899.89	2438.36	3118.9	0	5117.15	4	90.0191	19315	1734	533	20516	113.907	115.952	1.86715	121.471	7.38691	115.258	88.5	18086.4	9059.64	0	2.45	178.848
Pzh_02253	no	UXO	long thin boxes, sticking in the ground	327.843							118.023	275.451		0.0344979	0.259516	FineSilt-ModeratelySorted	3.5	2352.24	2300.26	6247.03	8281.79	1942.97	2502.28	3187.57	0	5183.49	4	89.136	19199	1719	531	20387	113.907	115.952	1.86715	121.471	7.38691	115.258	88.5	18086.4	9059.64	0	2.45	178.848
Pzh_02254	no	UXO	long thin boxes, sticking in the ground	191.74							69.0265	134.12		0.0344979	0.259516	FineSilt-ModeratelySorted	3.5	2352.4	2295.48	6221.74	8283.39	1967.09	2535.53	3220.86	0	5215.33	4	88.4221	19224	1726	534	20416	113.907	115.952	1.86715	121.471	7.38691	115.258	88.5	18086.4	9059.64	0	2.45	178.848
Pzh_02255	no	UXO	long thin boxes, sticking in the ground	222.377							80.0556	163.631		0.0344979	0.259516	FineSilt-ModeratelySorted	3.5	2354.33	2294.08	6205.91	8282.97	1984.65	2558.59	3242.63	0	5235.96	4	88.0463	19171	1726	529	20368	113.907	107.239	1.59956	112.004	6.36438	106.858	88.5	18086.4	9059.64	0	2.45	178.848
Pzh_02256	no	0	0	208.819							75.175	150.388		0.0346664	0.259516	FineSilt-ModeratelySorted	3.5	2284.18	2213.1	6096.06	8360.02	1987.18	2602.58	3348.8	0	5344.29	4	91.8829	19248	1731	505	20474	113.907	115.952	1.86715	121.471	7.38691	115.258	88.5	18086.4	9059.64	0	2.45	178.848
Pzh_02257	no	0	0	406.546							146.357	367.637		0.0346664	0.25667	FineSilt-ModeratelySorted	3.5	2300.87	2223.7	6076.16	8348.29	2028.28	2648.79	3382.78	0	5375.47	4	90.9247	19300	1725	506	20519	113.907	107.239	1.59956	112.004	6.36438	106.858	88.5	18086.4	9059.64	0	2.45	178.848
Pzh_02258	no	0	0	634.734							228.504	668.365		0.032556	0.268364	FineSilt-PoorlySorted	1.0625	3761.17	3429.11	6559.03	7109.89	3637.23	3756.36	4038.03	0	5688.63	4	41.8017	19544	1817	1126	20235	59.9551	62.2168	0.880819	65.8264	4.49039	62.0578	88.5	18086.4	9059.64	0	0	178.848
Pzh_02259	no	UXO	0	421.942							151.899	386.436		0.0349773	0.25347	MediumSilt-ModeratelySorted	4.0625	1697.92	1681.24	5995.09	8980.28	1106.47	1829.2	3210.59	0	5160.54	4	111.541	18527	1689	408	19808	113.907	115.516	2.03796	121.788	8.31078	114.483	88.5	18086.4	9059.64	0	2.45	14.0504
Pzh_02260	no	UXO	0	388.137							139.729	345.475		0.0349773	0.257842	MediumSilt-ModeratelySorted	4.0625	1796.88	1780.38	6052.96	8878.88	1175.38	1848.79	3140.53	0	5104.36	4	108.754	18771	1709	435	20045	113.907	115.516	2.03796	121.788	8.31078	114.483	88.5	18086.4	9059.64	0	2.45	14.0504
Pzh_02261	no	0	0	71.3475							25.6851	35.6004		0.0349773	0.257842	MediumSilt-ModeratelySorted	4.0625	1781.32	1765.03	6070.3	8888.67	1188.72	1874.17	3167.97	0	5133.36	4	108.983	18676	1703	435	19944	113.907	115.516	2.03796	121.788	8.31078	114.483	88.5	18086.4	9059.64	0	2.45	14.0504
Pzh_02262	no	0	0	141.15							50.8138	88.9203		0.0349773	0.25516	MediumSilt-ModeratelySorted	4.0625	1745.1	1728.96	6072.04	8920.61	1185.12	1891.61	3207.71	0	5171.48	4	109.585	18540	1697	422	19815	113.907	115.516	2.03796	121.788	8.31078	114.483	88.5	18086.4	9059.64	0	2.45	14.0504
Pzh_02263	no	UXO	V1 head	185.7							66.852	128.482		0.0338439	0.248508	MediumSilt-ModeratelySorted	3.75	1707.73	1471.34	5274.83	9063.69	2006.35	2878.99	4094.17	0	6099.34	4	143.286	19461	1732	386	20807	123.969	119.838	2.32223	127.386	9.87032	118.663	24.2667	5219.2	1270.24	0	2.45	178.848
Pzh_02264	no	UXO	V1?	92.7869							33.4033	50.6469		0.0324875	0.245691	MediumSilt-ModeratelySorted	3.75	1545.86	1338.56	5222.64	9205.99	1888.83	2791.97	4112.54	0	6111.3	4	141.942	19004	1689	374	20319	123.969	107.667	2.37853	115.267	9.97879	106.201	24.2667	5219.2	1270.24	0	2.45	178.848
Pzh_02271	no	UXO	V1, open TNT	36.4422							13.1192	14.4537		0.0332781	0.281164	VeryFineSand-PoorlySorted	1.0625	3581.44	3383.27	5200.33	8022.56	2088.01	1019.99	1295.93	0	2912.47	4	68.559	19515	1929	1028	20416	94.1377	90.8428	1.19717	95.6339	5.98834	90.6922	88.5	18086.4	9059.64	0	0	14.0504
Pzh_02272	no	UXO	V1, open TNT	105.454							37.9634	60.1339		0.0332781	0.281164	VeryFineSand-PoorlySorted	1.0625	3617.87	3404.52	5148.67	8038.17	2117.03	1000.71	1299.85	0	2863.3	4	68.2798	19312	1930	1022	20220	94.1377	90.8428	1.19717	95.6339	5.98834	90.6922	88.5	18086.4	9059.64	0	0	14.0504
Pzh_02273	no	UXO	munition boxes	65.0908							23.4327	31.4757		0.0333685	0.263202	MediumSilt-ModeratelySorted	4.0625	2634.01	2339.03	4665.19	9021.78	1102.23	296.405	2353.54	0	3793.74	4	93.2591	17893	1802	421	19274	106.846	103.07	1.55885	109.652	8.14056	102.299	88.5	18086.4	9059.64	0	2.45	14.0504
Pzh_02275	no	0	0	132.5							47.6999	81.6869		0.0345434	0.263202	MediumSilt-ModeratelySorted	1.0625	2744.37	2410.84	4543.03	9042.88	1213.65	257.879	2338.71	0	3691.62	4	92.8214	18109	1843	436	19516	94.9018	103.07	1.55885	109.652	8.14056	102.299	88.5	18086.4	9059.64	0	2.45	14.0504
Pzh_02279	no	0	0	1750.58							630.21	2607.08		0.0346176	0.254639	FineSilt-PoorlySorted	3.75	2152.8	1993.97	5747.17	8550.98	2119.65	2844.25	3718.26	0	5713.77	4	104.978	19287	1726	441	20572	123.969	115.166	1.80117	121.059	7.69388	114.607	88.5	18086.4	9059.64	0	2.45	178.848
Mean overall																		4347.14	2636.79	5014.47	8736.78	3462.21	984.334	1828.32	318.663	3838.25		149.861	63120.1	25538.5	44010.7	44647.9	230.343	152.171	81.4755	124.624	53.9282	71.3593	138.252
Stdev overall																		1078.64	1179.8	1087.92	9224.67	1641.59	1109.04	1281.14	774.604	4482.51		509.875	165406	54163.6	156809	56858.9	717.962	444.35	423.222	259.701	254.73	31.5235	90.3128
Mean + 3Stdev overall																		7583.06	6176.19	8278.23	36410.8	8386.96	4311.47	5671.74	2642.47	17285.8		1679.49	559338	188029	514437	215225	2384.23	1485.22	1351.14	903.727	818.118	165.93	409.191
Median overall																		4448.46	2848.73	5276.93	7176.03	3241.87	677.991	1688.04	0	2256.52		54.0925	23879	3703	4885	22682	72.9756	66.8895	1.53567	69.3711	4.57144	63.7914	195.633
Q1																		3648.79	1553.04	4573.33	6566.74	2278.78	404.378	985.574	0	984.902		45.1358	19243	1941.25	908.75	20242.8	68.5315	58.08	1.27295	57.7163	3.57242	52.98	88.5
Q3																		5112.87	3430.27	5681.53	8243.79	4468.36	1065.06	2317.94	0	4015.38		71.6396	35548.2	17085	16678.8	35986	91.4913	91.7862	2.50492	95.6339	6.75901	84.4849	195.633
IQR																		1464.09	1877.23	1108.2	1677.05	2189.57	660.683	1332.36	0	3030.48		26.5038	16305.2	15143.8	15770	15743.2	22.9598	33.7062	1.23197	37.9176	3.1866	31.5049	107.133
Median - Q1																		799.677	1295.69	703.597	609.291	963.085	273.613	702.463	0	1271.62		8.95669	4636	1761.75	3976.25	2439.25	4.44413	8.80945	0.262712	11.6548	0.999019	10.8114	107.133
Q3 - Median																		664.409	581.536	404.607	1067.76	1226.49	387.07	629.899	0	1758.86		17.5471	11669.2	13382	11793.8	13304	18.5157	24.8967	0.969257	26.2629	2.18758	20.6935	0
IQR (upper boundary) overall																		7309	6246.11	7343.84	10759.4	7752.72	2056.08	4316.48	0	8561.11		111.395	60006.1	39800.6	40333.8	59600.9	125.931	142.345	4.35288	152.51	11.5389	131.742	356.333
IQR (lower boundary) overall																		1452.66	-1262.81	2911.02	4051.16	-1005.58	-586.646	-1012.97	0	-3560.82		5.38009	-5214.88	-20774.4	-22746.2	-3372.12	34.0918	7.52075	-0.574999	0.839838	-1.20747	5.72269	-72.2
IQR (up) - Median																		2860.54	3397.38	2066.91	3583.34	4510.85	1378.09	2628.44	0	6304.59		57.3028	36127.1	36097.6	35448.8	36918.9	52.9553	75.456	2.81721	83.1394	6.96747	67.9508	160.7
Median - IQR (low)																		2995.81	4111.54	2365.9	3124.87	4247.44	1264.64	2701.01	0	5817.34		48.7124	29093.9	24477.4	27631.2	26054.1	38.8838	59.3687	2.11067	68.5312	5.77891	58.0687	267.833
Outliers (count)																		0	0	24	32	12	47	14	85	72		34	56	71	57	70	47	31	72	25	34	8	4
Min overall																		1545.86	0	108.709	292.862	495.799	2.33525	146.629	0	0		23.935	8774	601	71	9327	25.3578	30.9557	0.000330275	32.7619	1.70458	30.954	0
Max overall																		7050.76	4882.35	6809.98	59246.2	11367.1	8349.22	9207.05	4784.36	20620.4		4608.7	1134483	287076	1047962	297560	5538.77	4374.67	4116.7	2796.75	2728.77	303.024	690.8
Mean Haf																		3796.74	3248.29	4315.96	8220.24	2200.4	828.128	808.89	1511.65	11827.3		31.5312	12424.3	850.907	138.704	13136.5	39.5171	47.4672	0.202608	49.4875	2.2229	47.2684	0.449383
StDev Haf																		490.683	555.937	474.175	570.855	691.038	638.822	590.379	665.723	760.143		5.11991	2048.27	181.076	49.8608	2177.26	7.00902	8.0582	0.239185	8.13419	0.390242	7.87214	3.30228
StErr Haf																		66.7735	75.6534	64.5271	77.6835	94.0384	86.9326	80.3404	90.5935	103.442		0.696732	278.735	24.6413	6.7852	296.288	0.953806	1.09658	0.0325489	1.10692	0.0531052	1.07126	0.449383
Median Haf																		3907.14	3155.26	4356.73	8221.17	2216.19	670.449	718.119	1391.75	11764.4		31.0532	12293	834	135.5	13032	39.8896	45.8076	0.138332	47.7962	2.12684	45.6693	0
Mean - Stdev Haf																		3729.96	3172.63	4251.43	8142.56	2106.36	741.195	728.55	1421.06	11723.8		30.8344	12145.6	826.266	131.919	12840.2	38.5633	46.3706	0.17006	48.3806	2.1698	46.1971	0
Mean + Stdev Haf																		3863.51	3323.94	4380.48	8297.92	2294.44	915.061	889.23	1602.25	11930.7		32.2279	12703	875.549	145.489	13432.8	40.4709	48.5638	0.235157	50.5944	2.27601	48.3396	0.898765
Min Haf																		2926.99	1891.38	2945.3	6531.15	659.54	7.60275	146.629	0	8694.54		23.935	8774	601	71	9327	25.3578	30.9557	0.000330275	32.7619	1.70458	30.954	0
Max Haf																		4679.38	4346.44	5138.19	9740.33	5040.6	3885.75	3542.84	2588.9	12998.6		61.2205	18745	1502	322	19925	67.303	79.9416	1.29534	81.953	3.31046	78.8361	24.2667
Sum Haf
Mean Kbh																		3564.37	427.429	2260.67	57935.4	1652.12	1270.79	1415.38	2249.57	19384		1305.09	920890	121000	854862	187027	2214.7	1773.99	1607.22	445.27	278.498	169.768	0
StDev Kbh																		1130.03	520.907	1046.18	678.509	1084.23	1057.96	430	527.86	1094.68		1459.03	192636	21342.9	179927	34274.6	1959.14	1633.93	1547.89	352.429	265.488	88.5605	0
StErr Kbh																		282.507	130.227	261.544	169.627	271.058	264.49	107.5	131.965	273.671		364.758	48159.1	5335.71	44981.7	8568.66	489.784	408.484	386.972	88.1073	66.372	22.1401	0
Median Kbh																		3398.86	266	2308.28	57715.5	1575.05	1343.99	1272.36	2317.51	19486.3		454.242	954320	125322	887918	191724	1668.29	1609.3	1435.62	428.141	260.625	164.561	0
Mean - Stdev Kbh																		3281.86	297.202	1999.12	57765.7	1381.06	1006.3	1307.88	2117.61	19110.3		940.335	872731	115664	809881	178459	1724.92	1365.51	1220.25	357.162	212.126	147.627	0
Mean + Stdev Kbh																		3846.88	557.656	2522.21	58105	1923.17	1535.28	1522.88	2381.54	19657.7		1669.85	969049	126335	899844	195596	2704.48	2182.48	1994.19	533.377	344.87	191.908	0
Min Kbh																		2439.73	0	893.855	56951	495.799	2.33525	904.431	715.653	17490.4		105.552	600207	83959	554653	129513	279.531	130.788	63.129	76.3491	8.69018	69.7978	0
Max Kbh																		5839.43	1773.65	3599.31	59246.2	3938.38	3203.97	2327.22	2919.37	20620.4		4421.77	1134483	145813	1047962	232334	5538.77	4374.67	4116.7	921.442	663.469	303.024	0
Mean Pzh																		4449.18	2642.41	5212.01	6902.76	3696.75	993.638	1977.25	88.4307	2195.4		120.648	36582.1	25069.4	18395.9	43255.5	178.543	103.149	33.1103	122.032	51.9934	70.6984	161.57
StDev Pzh																		1099.82	1157.71	958.574	1509.89	1630.13	1157.14	1305.12	501.047	1722.69		415.123	33189.4	54602.6	34642.1	53108.3	550.844	167.92	170.475	263.872	266.492	20.4416	75.9542
StErr Pzh																		54.053	56.8985	47.1113	74.2071	80.1165	56.8703	64.1432	24.6251	84.6655		20.4022	1631.17	2683.57	1702.57	2610.13	27.0725	8.2528	8.37837	12.9686	13.0974	1.00465	3.73294
Median Pzh																		4631.48	2788.24	5416.91	7017.93	3442.05	669.433	1972.45	0	2019.66		55.2425	25296	5258.5	6401.5	24013.5	73.6968	70.1046	1.61059	72.3699	4.78345	66.2475	195.633
Mean - Stdev Pzh																		4395.13	2585.52	5164.9	6828.55	3616.63	936.768	1913.11	63.8055	2110.74		100.246	34950.9	22385.8	16693.4	40645.4	151.47	94.8964	24.732	109.064	38.896	69.6937	157.837
Mean + Stdev Pzh																		4503.24	2699.31	5259.12	6976.96	3776.86	1050.51	2041.39	113.056	2280.07		141.051	38213.3	27752.9	20098.5	45865.7	205.615	111.402	41.4887	135.001	65.0907	71.703	165.303
Min Pzh																		1545.86	0	108.709	292.862	750.368	5.07967	160.477	0	0		28.8039	17244	1689	370	18705	49.4061	35.1624	0.880819	38.8786	2.92655	31.5862	0
Max Pzh																		7050.76	4882.35	6809.98	9430.61	11367.1	8349.22	9207.05	4784.36	9895.31		4608.7	189407	287076	178923	297560	4673.44	1757.31	1689.33	2796.75	2728.77	118.663	690.8
Sum Pzh
Count																		484	484	484	484	484	484	484	484	484		484	484	484	484	484	484	484	484	484	484	484	484
Mann-Whitney-U-Test (Haf vs. Pzh)
Count Haf																												54
Count Pzh																												414
Rangsumme Haf																												1702.68
Rangsumme Pzh																												49948.5
U-Value Haf																												22138.3
U-Value Pzh																												58312.5
z-value																												11.7255
p-value (u-test)																												0
																		0	0	0	16	1	0	0	0	69

## Sheet: 1. Distance distribution
	Distance to							Gaussian kernel smoothing
	Cable	Bathing sites	Protected areas	Shipping lanes, anchorage areas, habours	Sediment deposits	Military areas		Distance	Cable		Bathing sites		Protected areas		Shipping lanes, anchorage areas, habours		Sediment deposits		Military areas
	8146.8	3717.09	3035.7	4075.77	12128.3	1809.93		0	0	0	-1.67149e-05	1.67149e-05	-1.11704	1.11704	-1.79588e-104	1.79588e-104	-0.741236	0.741236	-31.8356	31.8356
	8677.13	2941.63	2865.55	3881.64	12897.7	2572.5		100	0	0	0	0	-1.93472e-16	1.93472e-16	-0.0175014	0.0175014	-0.153028	0.153028	-4.40572e-86	4.40572e-86
	8678.33	2926.99	2851.35	3866.9	12913.5	2588.9		200	-1.0007e-76	1.0007e-76	0	0	-1.99347e-09	1.99347e-09	-3.26645e-74	3.26645e-74	-0.115648	0.115648	-2.08664e-29	2.08664e-29
	8603.76	3006.07	2835.61	3854.47	12837.8	2515.4		300	-0.0288003	0.0288003	0	0	-3.38062e-25	3.38062e-25	-3.89086e-112	3.89086e-112	-0.0829253	0.0829253	-0.0754444	0.0754444
	8194.03	3357.41	2678.41	3704.29	12527	2217.9		400	-1.58744e-101	1.58744e-101	0	0	-3.13766e-42	3.13766e-42	-0.00317784	0.00317784	-0.137575	0.137575	-8.41913e-39	8.41913e-39
	8280.49	3474.2	2937.06	3963.88	12373.4	2055.01		500	-3.31864e-40	3.31864e-40	0	0	-2.33833e-10	2.33833e-10	-4.97079e-68	4.97079e-68	-0.36696	0.36696	-5.42272e-55	5.42272e-55
	8271.76	3472.39	2923.68	3950.57	12376.8	2059.11		600	-1.37715e-11	1.37715e-11	0	0	-0.0797878	0.0797878	-3.94529e-253	3.94529e-253	-0.00710617	0.00710617	-0.0691667	0.0691667
	8200.36	3671.16	3052.95	4088.72	12170.7	1850.34		700	-3.89813e-13	3.89813e-13	0	0	-4.53306e-05	4.53306e-05	-1.67586e-44	1.67586e-44	-5.37024e-05	5.37024e-05	-0.00059414	0.00059414
	7481.28	4000.34	2810.7	3893.86	11618.7	1316.44		800	-2.1148e-09	2.1148e-09	0	0	-0.0186332	0.0186332	-1.36333e-09	1.36333e-09	-0.000244809	0.000244809	-0.000636061	0.000636061
	7632.56	4120.17	2928.02	4001.41	11663.7	1358.35		900	-1.44347e-147	1.44347e-147	0	0	-0.104417	0.104417	-0.0381066	0.0381066	-0.0794194	0.0794194	-1.60288e-06	1.60288e-06
	7697.38	4359.88	3151.71	4251.25	11476.6	1165.08		1000	0	0	0	0	-0.000651421	0.000651421	-8.34694e-36	8.34694e-36	-0.0628747	0.0628747	-0.000813143	0.000813143
	7728.13	4330.5	3158.8	4235.6	11524.7	1212.8		1100	-1.705e-80	1.705e-80	0	0	-0.0438431	0.0438431	-7.87056e-08	7.87056e-08	-1.47848e-36	1.47848e-36	-1.30171e-38	1.30171e-38
	8133.04	3983.38	3293.31	4353.07	11848.4	1520.64		1200	-0.0500346	0.0500346	0	0	-0.100267	0.100267	-0.00833442	0.00833442	-1.45083e-13	1.45083e-13	-0.058927	0.058927
	8653.51	3522.97	3424.09	4449.8	12311.3	1956.64		1300	-4.19414e-10	4.19414e-10	0	0	-0.111864	0.111864	-0.0249562	0.0249562	-0.00988019	0.00988019	-0.0231161	0.0231161
	8635.52	3422.68	3307.01	4332.32	12407.3	2060.3		1400	-0.106989	0.106989	-1.2624e-186	1.2624e-186	-0.152485	0.152485	-5.96713e-50	5.96713e-50	-0.0163281	0.0163281	-2.56572e-07	2.56572e-07
	8053.81	4232.06	3441.52	4506.13	11597.4	1266.02		1500	-3.11184e-28	3.11184e-28	-4.28577e-20	4.28577e-20	-0.0837338	0.0837338	-4.01787e-26	4.01787e-26	-0.0757047	0.0757047	-1.60524e-05	1.60524e-05
	8058.13	4218.56	3433.74	4497.95	11611	1279.79		1600	-7.01157e-211	7.01157e-211	-2.78656e-27	2.78656e-27	-0.0259744	0.0259744	-0.00442016	0.00442016	-0.00960984	0.00960984	-0.00330809	0.00330809
	8065.83	4191.11	3416.63	4480.11	11638.6	1307.92		1700	-1.45385e-33	1.45385e-33	-0.0973119	0.0973119	-0.00472981	0.00472981	-0.0398631	0.0398631	-0.251983	0.251983	-5.63156e-14	5.63156e-14
	8067.76	4177.05	3405.55	4468.73	11652.9	1322.59		1800	-2.06572e-15	2.06572e-15	-0.0657326	0.0657326	-3.62522e-05	3.62522e-05	-2.55685e-25	2.55685e-25	-0.0780962	0.0780962	-0.0110926	0.0110926
	8068.52	4162.51	3392.67	4455.58	11667.7	1337.92		1900	-5.62123e-171	5.62123e-171	-3.42971e-94	3.42971e-94	-0.0277952	0.0277952	-5.09695e-14	5.09695e-14	-0.204658	0.204658	-0.117037	0.117037
	8068.75	4149.72	3380.78	4443.48	11680.7	1351.49		2000	-2.458e-53	2.458e-53	-4.70701e-20	4.70701e-20	-0.038551	0.038551	-9.64397e-12	9.64397e-12	-0.200368	0.200368	-3.24848e-07	3.24848e-07
	8368.55	3343.89	2901.72	3927.41	12502.7	2183.29		2100	-2.04598e-06	2.04598e-06	-0.000797601	0.000797601	-0.0553002	0.0553002	-4.22379e-34	4.22379e-34	-0.0793767	0.0793767	-7.06642e-15	7.06642e-15
	8609.07	2961.5	2793.2	3810.59	12886.4	2565.68		2200	-3.26159e-133	3.26159e-133	-5.20104e-19	5.20104e-19	-0.00262425	0.00262425	-2.2457e-14	2.2457e-14	-0.140603	0.140603	-0.00110394	0.00110394
	8599.83	2991.64	2814.09	3832.54	12854.4	2533		2300	0	0	-0.187305	0.187305	-0.415498	0.415498	-3.37957e-27	3.37957e-27	-0.180134	0.180134	-1.6786e-26	1.6786e-26
	7602.98	4449.38	3100.07	4360.4	11268.2	956.588		2400	-5.63812e-106	5.63812e-106	-0.000567255	0.000567255	-0.0183265	0.0183265	-6.01196e-208	6.01196e-208	-0.0930764	0.0930764	-0.0330873	0.0330873
	8378.74	3477.97	3101.89	4642.13	8694.54	0		2500	-0.0131105	0.0131105	-0.00609525	0.00609525	-0.136267	0.136267	0	0	-0.130384	0.130384	-0.0957875	0.0957875
	7251.9	4674.11	2876.08	4638.74	10642.5	334.754		2600	-0.0024368	0.0024368	-0.258019	0.258019	-0.0205005	0.0205005	0	0	-0.0238557	0.0238557	-0.0844897	0.0844897
	7220.89	4679.38	2854.06	4639.89	10605.5	298.29		2700	-1.00456e-113	1.00456e-113	-0.119537	0.119537	-0.0581184	0.0581184	0	0	-0.0189483	0.0189483	-1.9145e-13	1.9145e-13
	7460.12	3179.05	1940.36	3003.54	12456.5	2148.63		2800	0	0	-0.00436403	0.00436403	-0.109854	0.109854	-3.28254e-185	3.28254e-185	-0.239764	0.239764	-1.45835e-08	1.45835e-08
	7513.5	3147.17	1891.38	2945.3	12554.7	2246.7		2900	0	0	-0.00460597	0.00460597	-0.16873	0.16873	-1.18872e-19	1.18872e-19	-0.00843693	0.00843693	-0.00814752	0.00814752
	8596.44	4020.95	4152.71	5122.12	11393.6	984.857		3000	0	0	-0.0578559	0.0578559	-0.0839551	0.0839551	-0.0621292	0.0621292	-0.0085386	0.0085386	-2.74718e-58	2.74718e-58
	8562.35	4056.67	4123.48	5138.19	11355.2	949.134		3100	0	0	-0.0547868	0.0547868	-0.335116	0.335116	-1.57688e-07	1.57688e-07	-0.0260175	0.0260175	-8.27183e-35	8.27183e-35
	8869.97	3763.59	4323.71	4809.37	11403.5	947.465		3200	0	0	-0.000145228	0.000145228	-0.16003	0.16003	-1.20273e-109	1.20273e-109	-0.0641234	0.0641234	-1.2876e-14	1.2876e-14
	8695.23	3564.36	3507.54	4533.28	12275.7	1913.95		3300	0	0	-0.159851	0.159851	-0.201692	0.201692	-0.00610653	0.00610653	-0.0837518	0.0837518	-3.83856e-168	3.83856e-168
	8632.54	3583.49	3459.78	4485.64	12251.7	1895.83		3400	0	0	-6.84454e-05	6.84454e-05	-0.434808	0.434808	-2.67463e-42	2.67463e-42	-0.0794924	0.0794924	0	0
	8241.98	3626.71	3056.71	4089.26	12213.4	1891.67		3500	0	0	-0.0364085	0.0364085	-0.11841	0.11841	-1.75204e-87	1.75204e-87	-2.39698e-19	2.39698e-19	0	0
	8023.53	3890.11	3067.24	4125.41	11958.3	1642		3600	0	0	-0.000599167	0.000599167	-0.0112691	0.0112691	-0.0790247	0.0790247	-0.00101558	0.00101558	0	0
	7794.02	3925.73	2807.39	3869.07	11968.1	1662.6		3700	0	0	-0.00840997	0.00840997	-0.00250835	0.00250835	-0.0552597	0.0552597	-0.0404834	0.0404834	0	0
	8620.26	3034.09	2888.81	3908.31	12804.9	2479.82		3800	0	0	-0.10181	0.10181	-0.000760138	0.000760138	-0.00845314	0.00845314	-0.0364479	0.0364479	0	0
	8970.35	3520.22	3745.92	4770.2	12360.3	1967.41		3900	0	0	-0.212227	0.212227	-0.137486	0.137486	-0.0577099	0.0577099	-0.0956922	0.0956922	-4.58478e-121	4.58478e-121
	8281.76	4286.79	3733.71	4796.48	11549.2	1193.11		4000	0	0	-0.198929	0.198929	-0.00170706	0.00170706	-0.0766773	0.0766773	-0.179539	0.179539	-0.00021988	0.00021988
	8187.48	4310.49	3656.65	4721.14	11520.4	1173.11		4100	0	0	-0.123339	0.123339	-0.0102315	0.0102315	-0.209231	0.209231	-0.0515763	0.0515763	-2.01957e-61	2.01957e-61
	8704.79	3910.15	4044.67	5086.16	11724.8	1323.21		4200	0	0	-0.202998	0.202998	-0.0808955	0.0808955	-0.1636	0.1636	-0.00292778	0.00292778	-3.55255e-292	3.55255e-292
	9530.22	3107.51	3767.66	4268.61	11772.9	1207.61		4300	0	0	-0.160276	0.160276	-0.00345043	0.00345043	-0.0718751	0.0718751	-0.00027282	0.00027282	0	0
	8965.13	3650.08	4346.44	4841.21	11626.4	1171.69		4400	0	0	-0.0747332	0.0747332	-0.0913277	0.0913277	-0.0504847	0.0504847	-2.02239e-120	2.02239e-120	0	0
	7666.82	4051.52	2854.71	3922.11	11779	1474.32		4500	-3.48569e-147	3.48569e-147	-0.132311	0.132311	-0.00760183	0.00760183	-0.236685	0.236685	-1.10418e-32	1.10418e-32	0	0
	8279.69	3904.13	3382.62	4428.74	11924.4	1587.38		4600	-2.60076e-09	2.60076e-09	-0.364662	0.364662	-0.0749711	0.0749711	-1.13081e-05	1.13081e-05	-3.55376e-09	3.55376e-09	-4.74591e-297	4.74591e-297
	8124.93	4073.86	3371.82	4433.45	11756	1425.15		4700	-4.83971e-06	4.83971e-06	-0.180982	0.180982	-0.0117273	0.0117273	-0.0218742	0.0218742	-0.0696013	0.0696013	-1.21866e-63	1.21866e-63
	9740.33	3059.38	4116.4	5118.03	12998.6	2531.71		4800	-0.00319395	0.00319395	-0.227789	0.227789	-1.63948e-06	1.63948e-06	-0.214379	0.214379	-1.61573e-09	1.61573e-09	-0.000599313	0.000599313
	7323.09	4332.76	2837.54	4272.67	11088.6	784.457		4900	-0.044003	0.044003	-0.0831722	0.0831722	-0.000160519	0.000160519	-0.0724353	0.0724353	-1.50922e-05	1.50922e-05	-5.64458e-118	5.64458e-118
	8535.2	4133.78	4169.29	4989.97	11027.4	602.673		5000	-0.0402316	0.0402316	-0.100832	0.100832	-4.67777e-122	4.67777e-122	-0.199822	0.199822	-0.0797873	0.0797873	0	0
	8532.54	4223.97	4248.03	4863.8	10728.1	282.621		5100	-8.13239e-79	8.13239e-79	-0.297162	0.297162	0	0	-0.00379786	0.00379786	-0.0561641	0.0561641	0	0
	8080.64	4531.58	3626.91	4879.73	11226.9	876.746		5200	-0.000680704	0.000680704	-0.156302	0.156302	0	0	-0.189075	0.189075	-0.00106966	0.00106966	0	0
	6531.15	4119.87	2120.12	4032.67	10576.7	268.801		5300	-0.0727692	0.0727692	-0.141277	0.141277	0	0	-0.231082	0.231082	-7.36404e-19	7.36404e-19	0	0
	57123.1	2488.48	0	3599.31	20620.4	2055.37		5400	-0.00178177	0.00178177	-0.42584	0.42584	0	0	-0.329611	0.329611	-4.75951e-07	4.75951e-07	0	0
	57366.8	2611.55	0	3322.98	20393.5	2228.39		5500	-1.60429e-05	1.60429e-05	-0.35779	0.35779	0	0	-0.409726	0.409726	-1.63782e-136	1.63782e-136	0	0
	57353	2612.06	0	3331.74	20398.3	2215.51		5600	-0.0328416	0.0328416	-0.0869622	0.0869622	0	0	-0.131124	0.131124	-4.0716e-36	4.0716e-36	0	0
	58440.9	4670.65	1017.55	1062.55	18175.9	1879.38		5700	-3.11896e-06	3.11896e-06	-0.0785768	0.0785768	0	0	-0.845037	0.845037	-0.00780987	0.00780987	0	0
	58612.7	4407.12	769.856	1210.71	18427.9	2179.82		6000	-0.0181055	0.0181055	-7.12867e-88	7.12867e-88	0	0	-0.202308	0.202308	-1.50875e-87	1.50875e-87	0	0
	58847.4	4185.67	549.946	1325.56	18657.5	2466.86		6100	-5.41448e-09	5.41448e-09	0	0	0	0	-0.190058	0.190058	-0.0853228	0.0853228	0	0
	58814.2	4234.49	599.979	1292.38	18605.7	2406.63		6200	-0.0346074	0.0346074	-5.67758e-228	5.67758e-228	0	0	-0.207324	0.207324	-3.61236e-70	3.61236e-70	0	0
	59246.2	4201.5	532	1216.83	18697	2585.37		6300	-0.000580663	0.000580663	-1.59169e-34	1.59169e-34	0	0	-0.0895105	0.0895105	0	0	0	0
	56951	5839.43	1773.65	893.855	17490.4	715.653		6400	-0.0601062	0.0601062	-3.15221e-06	3.15221e-06	0	0	-0.000282626	0.000282626	0	0	0	0
	57540.8	4634.77	814.139	1552.89	18390.8	1864.57		6500	-0.115641	0.115641	-3.35342e-132	3.35342e-132	0	0	-1.79187e-08	1.79187e-08	0	0	0	0
	57524.1	4606	781.751	1586.12	18423.5	1894.03		6600	-0.061765	0.061765	0	0	0	0	-0.0789808	0.0789808	-1.38491e-231	1.38491e-231	0	0
	57817.6	2600.85	0	3074.37	20275.7	2662.06		6700	-0.175876	0.175876	-2.29962e-155	2.29962e-155	0	0	-0.00223046	0.00223046	-6.59498e-36	6.59498e-36	0	0
	58048.1	2519.35	0	3042.31	20323.4	2910.69		6800	-0.384695	0.384695	-2.98862e-11	2.98862e-11	0	0	-0.0108642	0.0108642	-6.01469e-14	6.01469e-14	0	0
	58058.9	2528.1	0	3030.45	20313.9	2919.37		6900	-0.0814718	0.0814718	-1.10877e-13	1.10877e-13	0	0	-3.32965e-72	3.32965e-72	-0.00157595	0.00157595	0	0
	57607.6	2450.19	0	3311.42	20471	2500.43		7000	-0.314361	0.314361	-3.79369e-12	3.79369e-12	0	0	0	0	-1.00956e-114	1.00956e-114	0	0
	57613.4	2439.73	0	3317.2	20479.6	2509.05		7100	-0.172331	0.172331	-7.9308e-23	7.9308e-23	0	0	0	0	0	0	0	0
	7324.14	4554.15	2508.92	5269.6	1511.78	0		7200	-0.150838	0.150838	-2.84959e-195	2.84959e-195	0	0	0	0	0	0	0	0
	5436.19	5587.76	4463.16	5003.34	1964.53	0		7300	-0.147777	0.147777	0	0	0	0	0	0	0	0	0	0
	7814.76	4137.98	3102.05	5027.58	2222.58	0		7400	-0.30732	0.30732	0	0	0	0	0	0	-2.00287e-80	2.00287e-80	0	0
	8415.5	3459.61	2726.53	4222.89	2207.81	0		7500	-0.121459	0.121459	0	0	0	0	0	0	-0.0496254	0.0496254	0	0
	7057.44	4863.46	1487.63	5279.03	559.254	0		7600	-0.214267	0.214267	0	0	0	0	0	0	-2.13409e-40	2.13409e-40	0	0
	7034.37	5112.37	548.201	5242.64	723.648	0		7700	-0.162434	0.162434	0	0	0	0	0	0	-0.0115034	0.0115034	0	0
	7043.28	5101.16	554.652	5233.55	726.398	0		7800	-0.0919343	0.0919343	0	0	0	0	0	0	-4.80813e-06	4.80813e-06	0	0
	7054.56	5119.13	468.204	5224.8	782.99	0		7900	-2.53582e-10	2.53582e-10	0	0	0	0	0	0	-1.64336e-25	1.64336e-25	0	0
	6638.62	5600.97	539.863	5630.87	579.669	0		8000	-0.00128822	0.00128822	0	0	0	0	0	0	-4.37141e-203	4.37141e-203	0	0
	6654.71	5478.79	719.33	5622.67	416.977	0		8100	-0.0232149	0.0232149	0	0	0	0	0	0	0	0	0	0
	6698.25	5453.07	653.159	5580.61	480.796	0		8200	-0.122318	0.122318	0	0	0	0	0	0	0	0	0	0
	6792.46	5285.31	811.759	5483.43	416.701	0		8300	-0.149354	0.149354	0	0	0	0	0	0	0	0	0	0
	7947.73	3927.97	2567.83	4664.64	1856.48	0		8400	-0.0660622	0.0660622	0	0	0	0	0	0	0	0	0	0
	7795.37	4072.74	2297.87	4727.72	1585.79	0		8500	-0.0335823	0.0335823	0	0	0	0	0	0	0	0	0	0
	7092.25	4938.7	943.402	5190.05	554.478	0		8600	-0.278579	0.278579	0	0	0	0	0	0	-1.85665e-79	1.85665e-79	0	0
	7077.15	4957.59	927.861	5204.34	548.359	0		8700	-0.10143	0.10143	0	0	0	0	0	0	-0.0439563	0.0439563	0	0
	7244.16	4829.46	809.723	5033.34	752.093	0		8800	-7.12441e-05	7.12441e-05	0	0	0	0	0	0	-1.99306e-98	1.99306e-98	0	0
	7269.13	4721.95	1133.8	5026.3	680.542	0		8900	-0.00617116	0.00617116	0	0	0	0	0	0	0	0	0	0
	7133.79	4828.89	1248.11	5172.7	548.107	0		9000	-0.108027	0.108027	0	0	0	0	0	0	0	0	0	0
	7141.74	4821.76	1244.64	5164.44	555.571	0		9100	-0.0851441	0.0851441	0	0	0	0	0	0	0	0	0	0
	5538.45	6361.36	2251.53	4738.62	0	0		9200	-0.0389069	0.0389069	0	0	0	0	0	0	0	0	0	0
	5529.11	6369.73	2264.76	4730.71	0	0		9300	-0.115573	0.115573	0	0	0	0	0	0	-1.73799e-300	1.73799e-300	0	0
	5520.63	6377.48	2275.69	4723.32	0	0		9400	-5.78301e-10	5.78301e-10	0	0	0	0	0	0	-3.22179e-65	3.22179e-65	0	0
	7474.78	4436.6	2834.91	5244.36	1856.73	0		9500	-9.27799e-10	9.27799e-10	0	0	0	0	0	0	-0.00114381	0.00114381	0	0
	7360.24	4561.29	2902.18	5380.47	1859.15	0		9600	-4.10261e-44	4.10261e-44	0	0	0	0	0	0	-7.77713e-116	7.77713e-116	0	0
	7111.11	4658.37	3123.61	5701.14	1913.33	0		9700	-5.94015e-16	5.94015e-16	0	0	0	0	0	0	0	0	0	0
	7224.3	4495.51	3242.05	5649.51	2074.16	0		9800	-9.472e-33	9.472e-33	0	0	0	0	0	0	-9.81209e-81	9.81209e-81	0	0
	7437.23	4210.99	3441.52	5547.75	2348.78	0		9900	-2.89263e-223	2.89263e-223	0	0	0	0	0	0	-0.0514349	0.0514349	0	0
	9300.19	2563.34	2180.52	4395.22	3901.19	0		10000	0	0	0	0	0	0	0	0	-5.1637e-97	5.1637e-97	0	0
	7585.06	4149.38	3383.92	5382.88	2368.53	0
	7571.42	4132.08	3422.43	5414.42	2394.92	0
	7140.45	4596.95	3183.36	5699.86	1979.64	0
	6634.39	5290.29	1520.13	5689.93	233.671	0
	8583.15	3298.53	2876.15	4102.67	2391.02	0
	6771.65	5204.28	1208.29	5523.4	184.085	0
	6782.12	5194.68	1201.97	5512.71	194.946	0
	6802.26	5165.04	1243.38	5496.96	212.456	0
	6700.83	5283.35	1188.73	5590.3	135.871	0
	7265.82	4637.87	2774.53	5420	1704.78	0
	6873.01	5061.98	1407.81	5447.06	347.45	0
	6774.88	5163.86	1400.99	5540.63	251.589	0
	6639.57	5341.68	1220.67	5651.97	80.3437	0
	6572.98	5412.34	1226.84	5692.82	39.2898	0
	6505.16	5542.15	1033.01	5585.91	134.805	0
	6379.47	5718.47	978.891	5431.85	143.143	0
	7627.04	3555.55	3511.87	5843.5	3157.69	0
	5663.66	5713.99	3669.18	5118.61	1315.12	0
	4839.12	7034.47	3010.77	4097.57	17.7704	0
	5727.41	5512.3	3927.23	5225.59	1617.42	0
	5722.54	5506.73	3949.31	5223.89	1635.13	0
	5734.12	5493.81	3950.45	5236.18	1645.19	0
	5970.76	5118.29	4229.42	5524.03	2085.26	0
	6133.45	4957.93	4215.69	5689.32	2188.68	0
	6341.46	4580.91	4562.55	5963.89	2708.48	0
	6480.36	4472.39	4453.77	6093.02	2728.31	0
	6504.12	4353.08	4335.16	6156.84	2982.47	0
	6918.85	3886.34	3868.72	6600.94	3399.57	0
	6362.22	5801.75	867.899	5382.66	251.633	0
	6566	5495.14	959.315	5639.56	210.751	0
	6751.15	5185.34	1419	5565.61	243.499	0
	6761.24	5177.27	1405.04	5554.21	241.951	0
	6771.43	5161.44	1436.63	5548.46	275.075	0
	6775.03	5154.4	1457.27	5547.75	294.543	0
	6738.99	5195.53	1433.3	5579.05	244.482	0
	8049.01	3735.07	3488.72	5043.63	2722.18	0
	8049.55	3724.81	3480.75	5050.51	2733.94	0
	6391.86	5736.22	909.849	5429.44	209.664	0
	6442.51	5663	918.427	5491.73	205.512	0
	6517.02	5502.09	1119.98	5614.53	80.142	0
	6539.79	5466.67	1155.74	5645.38	67.3626	0
	6567.42	5418.52	1226.37	5686.81	36.5964	0
	6629.12	5330.56	1325.01	5671.54	54.55	0
	6611.51	5351.56	1313.99	5687.25	28.0844	0
	6576.97	5408.46	1224.87	5696.75	42.6738	0
	6567.55	5413.03	1249.31	5690.68	22.3597	0
	6593.96	5370.82	1311.7	5703.8	8.44882	0
	6576.36	5389.04	1314.94	5710.63	0	0
	6590.73	5381	1280.3	5703.97	16.0984	0
	6568.52	5397.38	1315.35	5702.38	0	0
	6578.03	5400.19	1255.69	5702.88	24.131	0
	6582.68	5392.02	1269.66	5710.08	18.0994	0
	6587.29	5385.99	1274.41	5706.72	17.7731	0
	6572.99	5397.48	1292.43	5703.45	0	0
	6570.06	5398.28	1303.39	5702.09	0	0
	6691.96	5214.95	1631.74	5652.35	379.498	0
	6992.56	4876.29	2119.74	5471.16	1003.76	0
	5759.38	5098.53	4877.69	5402.76	2581.63	0
	5769.53	5086.51	4882.35	5413.93	2592.04	0
	5638.98	5068.98	4524.34	5373.48	3163.63	0
	5386.21	5253.85	3970.47	5207.26	3708.23	0
	5373.99	5258.59	3771.08	5245.48	4056.86	0
	5368.96	5263.71	3763	5241.57	4063.83	0
	4894.55	5737.92	3370.62	4769.92	4038.21	0
	7713.43	4207.98	2920.04	5046.71	2029.06	0
	7030.16	4602.6	3310.5	5853.22	2023.47	0
	6807.43	4581.7	3667.46	6206.87	2187.88	0
	6789.42	4605.92	3652.63	6215.05	2164.05	0
	5005.85	5881.83	4681.45	4626.28	2264.97	0
	5540.87	5160.01	4426.84	5281.25	3180.06	0
	5215.43	5748.49	4671.54	4803.62	2062.41	0
	7218.67	4651.76	2347.16	5319.08	1322.64	0
	8319.94	3624.62	3321.62	4765.06	2802.58	0
	8274.25	3619.46	3331.15	4828.08	2810.75	0
	8303.75	3557.21	3273.96	4834.9	2873.88	0
	8390.77	3418.84	3140.68	4824.87	3012.22	0
	8356.66	3469.2	3189.91	4831.28	2962.12	0
	7944.24	3930.31	2124.88	4516.51	1571.16	0
	8343.06	3492.96	3212.37	4831.19	2938.22	0
	8373.4	3466.21	3182.35	4811.53	2963.72	0
	8390.44	3461.03	3173.02	4793.13	2967.84	0
	8544.59	3250.78	2963.28	4754.8	3176.83	0
	7514.42	4417.41	2968.12	5260.9	1986.75	0
	7699.96	4229.8	2968.52	5080.87	2065.04	0
	7846.74	4112.23	3135.36	5011.51	2262.79	0
	8122.17	3848	3396.45	4866.92	2583.08	0
	8017.99	3942.46	3166.43	4854.73	2353.11	0
	8032.32	3912.95	3098.29	4806.98	2302.85	0
	8049.09	3906.7	3150.84	4815.42	2352.29	0
	7667.24	4201.65	2336.9	4872.38	1542.19	0
	7684.47	4184.29	2333.91	4853.82	1549.31	0
	7710.11	4158.56	2334.39	4827.73	1563.61	0
	7656.37	4222.33	2547.35	4956.12	1697.72	0
	7423.97	4477.39	2756.65	5262.72	1767.53	0
	7403.6	4500.96	2781.6	5291.84	1778.89	0
	7462.75	4447.55	2826.7	5252.67	1844.34	0
	7537.04	4360.13	2728.13	5142.13	1794.29	0
	7518.31	4405.29	2918.39	5236.37	1946.59	0
	7040.31	4878.86	1499.46	5297.56	551.08	0
	7058.84	4864.92	1468.49	5274.82	550.178	0
	7077.77	4844.24	1480.41	5258.03	573.164	0
	6998.48	4929.39	1442.41	5330.01	482.268	0
	6972.18	4959.21	1421.3	5352.71	447.029	0
	7105.32	4805.95	1557.14	5243.04	639.733	0
	7110.62	4796.83	1586.54	5242.77	661.87	0
	7129.49	4779.29	1576.96	5222.62	671.323	0
	7115.26	4789.51	1607.92	5241.89	678.967	0
	7300.38	4591.83	1734.86	5083.07	899.519	0
	7544.15	4325.12	2331.63	4995.06	1473.1	0
	7568.28	4300.57	2315.79	4965.78	1473.61	0
	7572.78	4296.68	2344.05	4970.3	1497.55	0
	6899.41	5009.07	1585.3	5447.5	495.6	0
	6855.43	5055.07	1574.84	5488.02	454.243	0
	6994.12	4952.92	1328.3	5319.44	427.861	0
	6913.43	5003.25	1523.06	5424.27	459.44	0
	6930.19	4987.06	1517.61	5407.27	469.384	0
	6936.36	4988.6	1464.69	5393.53	439.62	0
	6942.7	4990.3	1413.18	5380.28	415.421	0
	6990.84	4931.72	1477.43	5342.49	495.226	0
	7000.71	4924.31	1460.85	5330.48	494.377	0
	7019.75	4905.17	1461.02	5311.93	511.433	0
	6974.29	4950.42	1463.92	5356.62	472.679	0
	7032.22	4889.73	1480.55	5302.62	533.269	0
	7060.32	4720.18	3089.02	5732.6	1855.57	0
	7016.12	4821.16	2987.93	5731.92	1745.27	0
	7059.02	4697.12	3125.96	5748.98	1885.72	0
	7070.73	4728.71	3063.73	5712.9	1840.38	0
	7220.38	4549.52	3164.27	5619.22	2007.03	0
	6954.68	4764.82	3150.03	5851.91	1844.47	0
	6822.79	4917.74	3081.4	5940.59	1704.97	0
	6933.81	4846.53	3049.23	5829.78	1747.32	0
	7211.06	3994.6	3955.76	6092.16	2794.16	0
	7032.13	4606.27	3302.07	5847.79	2017.56	0
	5630.41	5502.44	4169.69	5161.47	1786.76	0
	5593.34	5520.14	4219.57	5130.36	1811.89	0
	5345.71	5652.42	4548.89	4921.63	2002.25	0
	8757.4	2598.88	2430.21	5053.37	3861.99	0
	8781.26	2588.63	2412.78	5029.53	3867.27	0
	8768.14	2610.03	2432	5026.6	3845.68	0
	5297.77	5678.48	4617.76	4881.95	2049.24	0
	6562.91	5064.06	3214.48	5981.01	1642.61	0
	6509.9	5093.34	3247.02	5931.82	1632.58	0
	6365.39	5634.44	1266.1	5474.34	0	0
	6537.49	5486.95	1091.64	5631.88	108.385	0
	6515.81	5506.88	1108	5611.11	87.6335	0
	6364.31	5693.46	1085.9	5438.01	49.5504	0
	6421.76	5676.14	949.539	5474.6	175.106	0
	6376.6	5705.79	1016.02	5437.03	110.073	0
	6354.19	5729.05	1029.4	5413.95	94.7738	0
	7753.38	4165.53	2909.27	5002.45	2035.79	0
	6749.72	5146.45	2765.97	5888.79	1391.09	0
	7175.35	4699.53	1946.64	5252.99	966.888	0
	6457.51	5116.03	3291.22	5884.86	1632.4	0
	4826.49	6853.92	3440.46	4172.43	398.237	0
	4834.42	6855.8	3423.24	4177.97	380.378	0
	4840.78	6850.93	3418.22	4184.13	376.178	0
	4858.02	6841.79	3399.1	4199.73	358.6	0
	4857.51	6854.89	3382.13	4195.85	338.747	0
	4852.48	6852.86	3394.09	4192.55	351.279	0
	4843.02	6863.05	3397.51	4182.59	352.974	0
	5989.63	4876.49	4824.52	5631.78	2662.56	0
	6523.83	4133.16	4115.26	6309.54	3826.99	0
	6552.97	4105.95	4089.28	6336.13	3823.96	0
	6843.77	3805.65	3784.75	6639.13	4042.79	0
	9430.61	2265.02	1910.25	4510.21	4187.11	0
	9042.42	2309.57	2119.27	4948.95	4128.3	0
	8609.6	2415.73	2373.26	5501.95	4180.95	0
	8514.43	2265.85	2247.45	5952.77	4559.61	0
	9097.36	2689.2	2349.84	4524.31	3749.66	0
	6853.81	3779.7	3740.47	6686.63	4283.15	0
	6873.6	5114.38	1134.19	5418.05	294.005	0
	4819.43	5848.91	3004.72	4780.56	4633.83	0
	4722.03	6847.08	3648.05	4095.65	611.003	0
	4785.65	6835.99	3542.17	4146.4	505.277	0
	6233.42	4630.61	4612.76	5879.56	2799.96	0
	6059.97	4851.38	4681.79	5682.81	2568.94	0
	6158.03	4739.41	4717.07	5788.26	2662.55	0
	6166.58	4740	4689.82	5792.99	2642.6	0
	5945.58	5087.9	4364.41	5518.21	2194.77	0
	8920.93	2978.25	3164.73	3861.21	2745.59	0
	6992.63	3644.92	3613.94	6809.98	4256.56	0
	7949.07	3924.01	2151.99	4519.48	1589.28	0
	8218.23	3689.33	2935.45	4535.09	2254.96	0
	8428.6	3516.38	3194.04	4438.3	2540.47	0
	8942.18	3155.37	2763.57	4335.62	3311.93	0
	8947.23	3182.11	2792.17	4302.29	3282.65	0
	9046.39	2830.26	2474.24	4467	3614.77	0
	9060.51	2756.24	2413.26	4511.7	3683.37	0
	6771.78	5301.32	833.597	5504.29	391.766	0
	8955.78	3050.24	3043.59	4083.15	3052.32	0
	8393.89	3486.31	2779.25	4270.93	2230.5	0
	8431.34	3445.15	2751.83	4216.47	2232.33	0
	8417.39	3460.25	2760.06	4235.89	2230.25	0
	8419.63	3462.39	2808.67	4255.72	2263.1	0
	8464.53	3433.86	2958.46	4277.45	2386.47	0
	8318.63	3551.43	2591.76	4273.38	2070.63	0
	8593.89	3282.67	2826.65	4066.21	2365.64	0
	8622.15	3254.91	2846.12	4042.98	2392.7	0
	8586.68	3286.94	2784.3	4054.29	2335.88	0
	8579.54	3290.69	2718.82	4032.06	2293	0
	8550.12	3321.67	2736.33	4074.12	2286.96	0
	9177.12	2817.75	2958.81	3861.23	3184.85	0
	9113.12	2888.06	2973.61	3931.26	3151.51	0
	8656.76	3296.47	2962.52	4576.44	3134.94	0
	8610.64	3455.22	3115.43	4506.57	2968.09	0
	8108.5	3794.27	2872.69	4622.74	2158.23	0
	8087.93	3808.59	2821.25	4621.54	2110.22	0
	7985.46	3908.34	2772.93	4708.05	2026.43	0
	7725.5	4334.71	1083.57	4556.68	1163.24	0
	7518.28	4454.41	1290.78	4789.66	930.065	0
	6990.04	5350.08	141.02	5324.2	978.507	0
	6993.04	5323.69	170.415	5314.74	949.103	0
	6390.08	5778.85	838.508	5408.64	281.024	0
	7160.62	4803.98	1240.87	5145.27	573.895	0
	6579.99	5495.36	910.564	5646.07	250.559	0
	6426.91	5633.07	1040.77	5499.91	102.114	0
	6461.58	5646.03	900.806	5509.95	223.918	0
	7543.71	4369.54	2851.73	5184.48	1901.52	0
	5870.82	5304.8	4044.53	5392.86	1839.26	0
	6225.91	4664.92	4646.85	5859.97	2720.15	0
	5971.14	4941.27	4685.58	5592.26	2517.84	0
	5864.25	5268.9	4138.19	5400.19	1923	0
	5259.52	5900.47	4188.7	4773.48	1555.83	0
	6682.89	3978.2	3963.19	6463.16	3867.45	0
	6128.73	4632.35	4615.59	5827.79	3092.51	0
	5989.51	4876.9	4823.6	5631.52	2661.6	0
	6284.31	4371.76	4352.14	6071.89	3736.63	0
	5364.19	5565.03	4732.4	4969.58	2209.63	0
	6924.06	4763.29	3192.02	5896.28	1861.11	0
	6969.66	4732.77	3181.3	5851.59	1879.66	0
	7043.47	4693.44	3150.5	5773.11	1897.29	0
	6808.87	5107.18	1540.73	5527.3	390.832	0
	6964.29	4958.39	1477.93	5368.36	472.319	0
	5450.01	5182.47	3896.75	5303.84	3946.74	0
	6356.97	5686.5	1130.07	5438.77	12.7143	0
	5919.67	5328.59	3888.36	5419.95	1732.57	0
	6800.35	5097.41	1688.08	5559.41	510.81	0
	7198.09	4676.41	1954.89	5232.76	987.033	0
	6677.54	5226.29	1659.83	5670.5	392.498	0
	6676.3	5263.41	1417.82	5636.9	178.36	0
	6660.05	5278.6	1428.24	5653.63	173.756	0
	7359.65	3901.55	3846.16	5933.85	2823.73	0
	7331.26	3918.93	3868.63	5964.15	2818.17	0
	7010.44	4911.1	1483.72	5324.34	516.046	0
	6641.69	5326.7	1278.82	5655.02	51.785	0
	6336.71	5147.11	3436.92	5782.73	1667.81	0
	6363.22	5144.75	3396.14	5803.86	1652.63	0
	6390.39	5141.67	3356.26	5825.81	1638.65	0
	6860.49	4908.35	3046.72	5893.81	1699.75	0
	7292.71	4515.54	3136.76	5541.1	2021.76	0
	7026.89	4780.29	3037.1	5741.67	1792.75	0
	7333.85	4442.61	3201.9	5531.64	2097.18	0
	7273.88	4527.61	3138.78	5559.29	2013.77	0
	9005.98	2812.66	2475.14	4530.25	3624.1	0
	7854.97	4040.92	2761.6	4837.84	1958.41	0
	8997.29	2785.18	2457.78	4563.98	3648.31	0
	7379.83	4523.96	2775.06	5312.06	1762.05	0
	7498.14	4370.59	2298.57	5030.64	1423.5	0
	4813.72	6832.95	3493.59	4168.43	456.504	0
	4629.36	7046.22	3543.82	3970.59	501.886	0
	4633.4	7049.75	3531.64	3972.69	490.997	0
	4638.8	7050.76	3520.34	3976.5	480.58	0
	5914.01	5316.54	3925.06	5419.62	1761.54	0
	5570.75	5786.45	3723.8	5029.16	1289.57	0
	5870.39	5273.08	4114.66	5403	1905.15	0
	6335.7	4734.75	4263.71	5903.01	2374.96	0
	6229.29	4749.52	4489.16	5827.56	2499.72	0
	6335.9	4566	4547.8	5966.76	2757.26	0
	6061.91	4833.36	4729.04	5691.76	2614.79	0
	6865.8	3959.19	3941.39	6537.86	3308.76	0
	6824.21	4053.89	4035.63	6472.33	3143.78	0
	6567.67	4358.82	4340.32	6192.07	2849.49	0
	6563.29	4365.71	4347.2	6186.62	2840.58	0
	6190.2	4444.93	4406.89	6020.98	3987.44	0
	6192.1	4442.61	4403.72	6024.59	3999.6	0
	5315.8	5666.4	4597.6	4897.78	2037.62	0
	5432.24	5488.38	4742.43	5042.37	2258.08	0
	5436.07	5480.33	4753.94	5048.15	2272.39	0
	2583.55	5586.06	4187.58	2161.01	3039.17	262.465
	2586.5	5587.22	4202.5	2161.82	3028.16	256.352
	2509.5	5382.81	3082.51	2245.95	3844.21	578.238
	2077.01	4875.94	2023.91	1966.21	4920.7	1228.33
	1195.17	4008.62	2019.66	1126.3	5662.83	2138.96
	1760.45	4479.71	248.126	1937.47	6762.64	1975.09
	770.465	3653.76	1252.69	884.404	6885.99	2827.85
	566.474	3287.9	888.453	770.096	7495.13	3161.62
	1402.18	4057.76	0	1709.51	7709.84	2519.42
	1338.56	3995.69	0	1652.73	7777.96	2590.98
	1269.13	3927.25	0	1587.01	7829.59	2663.33
	1393.52	4050.69	0	1707.39	7753.64	2537.8
	1352.72	4014.32	0	1679.19	7847.78	2596.33
	1444.86	4099.73	0	1747.99	7666.64	2472.01
	663.913	2045.81	1326.45	412.695	9485.43	4784.36
	292.862	3107.12	150.297	108.709	9895.31	4017.17
	7153.56	4677.19	3046.71	5630.83	1872.59	0
	7467.36	4080.85	3610.29	5603.83	2504.82	0
	7505.52	4083.28	3564.05	5545.7	2483.97	0
	6366.73	4967.15	3713.15	5854.07	1927.19	0
	6390.88	4573.08	4528.55	5997.66	2641.34	0
	6983.21	4056.52	4037.11	6442.58	2911.82	0
	7333.63	3963.38	3896.5	5915.89	2748.44	0
	7288.17	4606.28	3008.22	5491.13	1911.85	0
	6335.84	4966.78	3771.79	5831.13	1954.76	0
	7185.75	4731.44	2878.87	5534.49	1749.78	0
	7156.71	4756.94	2855.63	5552.46	1714.54	0
	7183.9	4728.4	2844.09	5522.87	1719.69	0
	7101.6	4807.25	2824.1	5591.43	1657.48	0
	7231.58	4682.17	2852.13	5481.58	1751.86	0
	7309.79	4471.44	3184.32	5546.04	2070.3	0
	7365.54	4443.94	3167.18	5487.02	2083.86	0
	7387.48	4348.09	3286.87	5520.57	2194.96	0
	6799.46	4826.78	3259.04	6032.82	1839.47	0
	7349.35	4375.1	3286.71	5555.54	2175.97	0
	7397.38	4157.54	3569.57	5646.66	2436.79	0
	7452.71	4212.61	3422.49	5524.39	2340.22	0
	7197.15	3914.92	3888.3	6206.14	2940.51	0
	7160.32	4021.16	3986.14	6152.92	2794.31	0
	7931.28	3962.87	2763.15	4760.11	1994.07	0
	7952.41	3941.26	2763.93	4738.57	2004.35	0
	7629.74	3529.53	3488.88	5868.19	3196.6	0
	7622.77	3650.98	3579.88	5748.87	3015.8	0
	7626.88	3651.47	3578.51	5741.57	3012.34	0
	7593.41	3488.01	3459.01	5984.17	3296.42	0
	7292.27	3543.9	3525.75	6549.94	3572.29	0
	7276.34	3768.93	3749.31	6235.41	3119.85	0
	7407.05	3675.35	3649.46	6102.22	3152.2	0
	7400.81	3677.46	3652.28	6111.43	3154.67	0
	7396.72	4361.67	3256.98	5498.37	2174.42	0
	6948.43	4538.37	3528.66	6022.47	2157.94	0
	6961.85	4540.42	3505.88	6000.42	2146.88	0
	7054.1	4660.18	3189.21	5779.85	1935.81	0
	7268.33	4420.98	3306.39	5638.36	2151.13	0
	7176.71	4657.95	3049.82	5610.96	1887.84	0
	7475.79	4237.29	3361.37	5473.88	2299.8	0
	8179.87	2770.85	2751.13	5822.41	3971.29	0
	8506.72	2582.42	2531.62	5466.64	4002.62	0
	6252.75	4807.19	4287.47	5821.95	2336.83	0
	6774.91	5040.82	2952.95	5933.59	1565.74	0
	6727.23	5063.85	2980.51	5985.74	1557.34	0
	6798.55	4604.14	3641.21	6202.06	2160.23	0
	6746.54	5148.25	1724.99	5616.81	502.591	0
	6566.99	5398.07	1319.9	5701.48	0	0
	6621.39	5334.54	1346.31	5681.11	65.7122	0
	9109.54	2698.63	2352.36	4501.71	3743.11	0
	7581.6	4311.46	2695.81	5085.97	1785.88	0
	7457.84	4441.69	2742.86	5224.8	1771.58	0
	9083.05	2676.33	2345.72	4552.6	3759.36	0
	7598.84	3124.54	3107.71	6615.65	4104.67	0
	7606.38	3143.06	3125.78	6539.78	4024.26	0
	6347.77	5720.03	1070.85	5415.78	58.1254	0
	8311.2	2347.14	2331.7	6433.76	4829.76	0
	8303.7	2350.92	2335.66	6458.22	4846.95	0
	8471.16	2244.49	2227.23	6133.87	4702.61	0
	8729.7	2483.49	2378.04	5218.61	4016.51	0
	8756.55	2481.47	2362.85	5179.55	4007.51	0
	8672.59	2571.24	2455.57	5209.11	3928.02	0
	8627.27	2601.79	2495.59	5245.55	3908.61	0
	8683.46	2540.65	2433.14	5226.26	3962.88	0
	8633.42	2440.21	2388.36	5427.79	4128.03	0
	8534.86	2554.77	2503.1	5452.72	4024.68	0
	8736.19	2115.17	2095.71	5709.7	4570.91	0
	8249.24	2706.42	2686.31	5778.11	4015.01	0
	9306.33	2853.06	2550.24	4023	3544.91	0
	8312.14	2324.67	2301.03	6383.2	4999.97	0
	8324.2	2309.03	2277.03	6322.28	5071.24	0
	8308.82	2324.12	2290.82	6326.66	5071.63	0
	8332.38	2299.93	2262.91	6285.45	5114.21	0
	8273.54	2358.73	2316.47	6301.67	5117.15	0
	8281.79	2352.24	2300.26	6247.03	5183.49	0
	8283.39	2352.4	2295.48	6221.74	5215.33	0
	8282.97	2354.33	2294.08	6205.91	5235.96	0
	8360.02	2284.18	2213.1	6096.06	5344.29	0
	8348.29	2300.87	2223.7	6076.16	5375.47	0
	7109.89	3761.17	3429.11	6559.03	5688.63	0
	8980.28	1697.92	1681.24	5995.09	5160.54	0
	8878.88	1796.88	1780.38	6052.96	5104.36	0
	8888.67	1781.32	1765.03	6070.3	5133.36	0
	8920.61	1745.1	1728.96	6072.04	5171.48	0
	9063.69	1707.73	1471.34	5274.83	6099.34	0
	9205.99	1545.86	1338.56	5222.64	6111.3	0
	8022.56	3581.44	3383.27	5200.33	2912.47	0
	8038.17	3617.87	3404.52	5148.67	2863.3	0
	9021.78	2634.01	2339.03	4665.19	3793.74	0
	9042.88	2744.37	2410.84	4543.03	3691.62	0
	8550.98	2152.8	1993.97	5747.17	5713.77	0

## Sheet: 2. Traffic (elbow graph)
	Index	k-distance	Perpendicular distance point to line
	1	17.2436	0
	2	18.2778	0.039791
	3	22.7777	3.51253
	4	22.7777	2.52783
	5	23.5731	2.33101
	6	23.8329	1.60365
	7	24.9615	1.7369
	8	24.9615	0.7522
	9	25.8235	0.621398
	10	25.9036	0.283994
	11	25.9036	1.26869
	12	26.1623	1.99718
	13	26.2608	2.88427
	14	26.6973	3.4366
	15	26.7793	4.34005
	16	26.7793	5.32475
	17	27.2703	5.82307
	18	27.2703	6.80776
	19	27.3556	7.70794
	20	28.4495	7.60914
	21	29.8116	7.24461
	22	30.6335	7.41513
	23	31.5834	7.45891
	24	35.0023	5.05696
	25	35.1063	5.93863
	26	35.222	6.80875
	27	35.453	7.56464
	28	35.453	8.54934
	29	35.7058	9.28362
	30	36.2206	9.75831
	31	37.2092	9.76379
	32	37.6202	10.3413
	33	38.6133	10.3423
	34	39.1832	10.7625
	35	40.3348	10.6065
	36	42.5927	9.35459
	37	42.6863	10.2466
	38	42.6863	11.2313
	39	44.1574	10.7587
	40	45.6436	10.2713
	41	46.2923	10.6135
	42	46.6466	11.2471
	43	50.3754	8.5383
	44	50.6594	9.24169
	45	51.8084	9.08818
	46	52.7572	9.13303
	47	53.4282	9.45303
	48	55.3324	8.55157
	49	55.5741	9.29684
	50	58.4523	7.43052
	51	59.3387	7.53718
	52	60.8052	7.06921
	53	60.8052	8.0539
	54	62.8271	7.03578
	55	62.8656	7.98234
	56	63.0052	8.82878
	57	63.5594	9.26452
	58	63.909	9.90294
	59	64.3527	10.4481
	60	65.2401	10.5537
	61	65.4538	11.3268
	62	66.8661	10.9125
	63	67.0614	11.7038
	64	67.1746	12.5764
	65	67.1746	13.5611
	66	67.3046	14.4169
	67	67.3046	15.4016
	68	67.8895	15.807
	69	68.3657	16.3199
	70	70.8489	14.8449
	71	71.1193	15.5617
	72	72.1717	15.504
	73	72.1717	16.4887
	74	72.5887	17.0603
	75	72.954	17.6832
	76	73.2897	18.3353
	77	73.379	19.2316
	78	74.127	19.4754
	79	74.6021	19.9894
	80	75.0011	20.5788
	81	75.7817	20.7903
	82	75.7841	21.7727
	83	76.915	21.6371
	84	77.5038	22.0385
	85	78.2721	22.2622
	86	78.2721	23.2469
	87	79.7055	22.8117
	88	80.3356	23.1723
	89	81.0457	23.4536
	90	81.9407	23.5518
	91	82.3056	24.175
	92	82.3865	25.0795
	93	82.7255	25.7285
	94	83.6751	25.7725
	95	83.9406	26.4942
	96	84.798	26.6296
	97	84.8474	27.5654
	98	85.131	28.2692
	99	85.2541	29.1319
	100	85.4734	29.8994
	101	85.8733	30.488
	102	85.9113	31.435
	103	86.1412	32.1919
	104	87.3148	32.0141
	105	87.9378	32.3817
	106	87.983	33.3216
	107	88.9015	33.3965
	108	89.2282	34.0576
	109	90.2439	34.0362
	110	90.2439	35.0209
	111	90.3585	35.8921
	112	91.9913	35.2594
	113	92.4746	35.7653
	114	92.9998	36.2298
	115	93.2187	36.9977
	116	93.2187	37.9824
	117	93.3237	38.8631
	118	93.4391	39.7334
	119	93.6997	40.46
	120	93.8833	41.2628
	121	94.2227	41.9114
	122	98.0608	39.0941
	123	98.4492	39.6942
	124	98.7497	40.3812
	125	98.9769	41.1408
	126	98.9769	42.1255
	127	100.506	41.5955
	128	100.632	42.4557
	129	101.418	42.6613
	130	101.654	43.412
	131	101.654	44.3967
	132	101.743	45.2936
	133	101.774	46.2473
	134	102.023	46.9857
	135	102.068	47.9257
	136	102.247	48.7334
	137	102.724	49.2452
	138	102.839	50.116
	139	102.839	51.1007
	140	104.134	50.8032
	141	104.59	51.3359
	142	104.59	52.3206
	143	104.842	53.0559
	144	106.369	52.5278
	145	106.999	52.8883
	146	107.661	53.2177
	147	109.162	52.7153
	148	109.776	53.0917
	149	110.529	53.3309
	150	110.529	54.3156
	151	110.91	54.9227
	152	111.13	55.689
	153	111.21	56.595
	154	111.326	57.465
	155	111.326	58.4497
	156	111.487	59.2747
	157	112.001	59.7499
	158	112.243	60.4954
	159	112.487	61.2376
	160	112.676	62.0353
	161	114.254	61.4573
	162	114.254	62.442
	163	116.554	61.1485
	164	118.383	60.3211
	165	119.665	60.0359
	166	119.962	60.7266
	167	124.038	57.6732
	168	124.038	58.6579
	169	124.509	59.1769
	170	124.983	59.692
	171	125.889	59.7788
	172	126.308	60.3487
	173	126.579	61.0651
	174	127.645	60.994
	175	129.153	60.484
	176	130.098	60.533
	177	130.215	61.4019
	178	132.02	60.599
	179	132.88	60.7316
	180	132.981	61.616
	181	133.096	62.4867
	182	133.116	63.4515
	183	133.544	64.0124
	184	133.544	64.9971
	185	134.359	65.1742
	186	134.435	66.0842
	187	134.973	66.5354
	188	136.229	66.2762
	189	136.494	66.9986
	190	137.102	67.3814
	191	137.283	68.186
	192	138.147	68.3149
	193	138.316	69.1323
	194	138.33	70.1034
	195	139.05	70.3748
	196	139.05	71.3595
	197	142.264	69.1608
	198	142.546	69.8657
	199	145.8	67.6277
	200	145.869	68.5441
	201	146.045	69.3544
	202	146.286	70.1006
	203	147.026	70.352
	204	147.083	71.2804
	205	147.678	71.6755
	206	148.228	72.1149
	207	148.291	73.0373
	208	148.656	73.6608
	209	149.272	74.0353
	210	149.272	75.02
	211	149.693	75.588
	212	150.618	75.6556
	213	150.618	76.6403
	214	150.931	77.3156
	215	151.675	77.5633
	216	151.702	78.5214
	217	153.196	78.0263
	218	156.173	76.0617
	219	157.028	76.1993
	220	157.36	76.8556
	221	158.17	77.0372
	222	160.171	76.0397
	223	161.234	75.9717
	224	161.534	76.6596
	225	165.016	74.1954
	226	166.565	73.6456
	227	168.347	72.8647
	228	168.531	73.6668
	229	169.268	73.9222
	230	169.362	74.8131
	231	169.735	75.4284
	232	169.882	76.2678
	233	172.466	74.6933
	234	172.772	75.3749
	235	173.001	76.1326
	236	173.725	76.3995
	237	175.117	76.0054
	238	176.516	75.6044
	239	177.369	75.7442
	240	177.452	76.647
	241	180.606	74.5072
	242	180.609	75.4889
	243	181.32	75.7699
	244	181.603	76.4743
	245	181.872	77.1918
	246	182.386	77.6677
	247	182.409	78.6292
	248	183.592	78.4421
	249	184.182	78.8424
	250	185.552	78.4703
	251	186.665	78.3524
	252	187.728	78.2839
	253	187.803	79.1946
	254	189.629	78.3709
	255	189.629	79.3556
	256	190.268	79.7067
	257	190.269	80.6906
	258	190.355	81.5904
	259	190.355	82.5751
	260	190.936	82.9839
	261	193.624	81.306
	262	193.965	81.9536
	263	193.999	82.9044
	264	194.249	83.6408
	265	194.364	84.5123
	266	197.251	82.6365
	267	197.389	83.4853
	268	197.507	84.3526
	269	197.688	85.1577
	270	198.046	85.7886
	271	202.53	82.3309
	272	202.792	83.0566
	273	202.792	84.0413
	274	203.179	84.6424
	275	203.831	84.9811
	276	203.876	85.9215
	277	204.474	86.3138
	278	204.725	87.0498
	279	205.828	86.9422
	280	207.006	86.7601
	281	207.378	87.3758
	282	209.233	86.5237
	283	212.679	84.0948
	284	213.328	84.4358
	285	213.328	85.4205
	286	213.91	85.8288
	287	214.628	86.1027
	288	214.734	86.9824
	289	215.49	87.2182
	290	218.144	85.5736
	291	218.482	86.2238
	292	218.817	86.8768
	293	219.434	87.2501
	294	219.783	87.8888
	295	221.038	87.6309
	296	221.038	88.6156
	297	221.073	89.5652
	298	222.804	88.8354
	299	223.18	89.4476
	300	224.849	88.7793
	301	224.882	89.7313
	302	225.516	90.0878
	303	226.126	90.4681
	304	226.271	91.3092
	305	230.79	87.8176
	306	230.888	88.7057
	307	232.886	87.7109
	308	233.088	88.4952
	309	234.147	88.4309
	310	234.525	89.0418
	311	235.641	88.9212
	312	237.681	87.8846
	313	237.681	88.8693
	314	238.08	89.4589
	315	239.316	89.2192
	316	239.579	89.9432
	317	241.715	88.8122
	318	242.584	88.936
	319	245.19	87.3392
	320	245.581	87.937
	321	246.946	87.5692
	322	247.618	87.8882
	323	249.596	86.9136
	324	250.101	87.3984
	325	250.878	87.6134
	326	251.682	87.8018
	327	253.26	87.2235
	328	253.501	87.9692
	329	253.914	88.545
	330	257.513	85.9645
	331	259.716	84.7671
	332	259.912	85.5576
	333	261.602	84.8678
	334	265.371	82.1191
	335	268.598	79.9082
	336	269.139	80.3567
	337	269.245	81.2358
	338	271.632	79.8567
	339	271.652	80.8213
	340	271.917	81.5433
	341	272.118	82.3288
	342	272.181	83.2514
	343	276.057	80.397
	344	277.132	80.3165
	345	280.071	78.3895
	346	284.818	74.6727
	347	289.868	70.6552
	348	290.814	70.7028
	349	290.911	71.5909
	350	293.361	70.1488
	351	294.367	70.1374
	352	296.791	68.7206
	353	298.533	67.9802
	354	300.445	67.0704
	355	300.945	67.5605
	356	300.945	68.5452
	357	305.3	65.2159
	358	305.799	65.7056
	359	309.555	62.97
	360	309.555	63.9547
	361	313.371	61.1597
	362	313.91	61.6102
	363	317.959	58.5842
	364	320.214	57.3353
	365	320.304	58.2306
	366	328.057	51.5361
	367	328.853	51.7318
	368	330.399	51.1856
	369	330.399	52.1703
	370	332.467	51.1059
	371	333.003	51.5601
	372	335.483	50.0876
	373	336.898	49.6709
	374	336.898	50.6556
	375	341.159	47.4192
	376	344.478	45.1163
	377	353.944	36.7245
	378	354.873	36.7893
	379	355.95	36.7071
	380	356	37.6418
	381	356.853	37.7825
	382	357.18	38.4428
	383	359.542	37.088
	384	359.542	38.0727
	385	361.333	37.2827
	386	362.35	37.26
	387	367.052	33.587
	388	367.361	34.266
	389	368.882	33.7441
	390	371.686	31.9513
	391	374.178	30.4679
	392	375.071	30.5677
	393	378.346	28.3084
	394	379.85	27.8034
	395	390.46	18.2784
	396	395.363	14.4062
	397	395.683	15.0741
	398	396.665	15.0861
	399	399.2	13.5599
	400	403.05	10.7305
	401	409.156	5.667
	402	410.674	5.14769
	403	412.478	4.3457
	404	412.478	5.3304
	405	416.198	2.63012
	406	417.856	1.97255
	407	424.267	3.39313
	408	426.491	4.61202
	409	427.941	5.06326
	410	430.857	6.96719
	411	434.615	9.7049
	412	437.969	12.0429
	413	439.631	12.7044
	414	440.624	12.7028
	415	442.885	13.9581
	416	446.89	16.9401
	417	447.905	16.961
	418	454.45	22.4599
	419	456.044	23.054
	420	457.024	23.0397
	421	460.034	25.0372
	422	473.498	37.3893
	423	474.651	37.5466
	424	474.666	36.5769
	425	475.463	36.3817
	426	476.074	36.0022
	427	476.595	35.5328
	428	479.505	37.4309
	429	480.488	37.4205
	430	481.152	37.0936
	431	482.237	37.1837
	432	490.616	44.498
	433	490.998	43.8917
	434	492.417	44.3132
	435	498.487	49.3414
	436	511.181	60.9308
	437	516.093	64.8119
	438	522.247	69.9222
	439	523.931	70.6058
	440	534.327	79.9195
	441	552.172	96.6111
	442	566.306	109.627
	443	572.975	115.248
	444	574.607	115.88
	445	597.741	137.811
	446	633.508	172.256
	447	637.906	175.627
	448	655.376	191.948
	449	692.061	227.301
	450	724.521	258.471
	451	728.009	260.941
	452	734.726	266.609
	453	748.608	279.376
	454	755.973	285.687
	455	761.201	289.881
	456	793.566	320.955
	457	830.697	356.751
	458	901.288	425.69
	459	920.351	443.589
	460	944.598	466.622
	461	955.811	476.745
	462	966.1	485.952
	463	1008.3	526.768
	464	1018.07	535.462
	465	1021.32	537.7
	466	1032.26	547.549
	467	1042.02	556.235
	468	1086.33	599.135
	469	1104.07	615.724
	470	1109.31	619.931
	471	1145.76	655.049
	472	1316.56	823.256
	473	1334.89	840.424
	474	1525.8	1028.55
	475	1617.24	1118.15
	476	1823.28	1321.25
	477	1845.16	1341.94
	478	2010.54	1504.77
	479	2117.71	1609.95
	480	2190.23	1680.8
	481	2263.01	1751.91
	482	2468.27	1954.24
	483	2468.29	1953.28
	484	2746.33	2227.71
	Max		2227.71

## Sheet: 3. Traffic (clusters)
		All Vessels								Passenger Vessels								Non-Passenger Vessels								Cargo Vessels								Non-Cargo Vessels								Other Vessels
	Cluster	0	1	2	3	4	5	6		0	1	2	3	4	5	6		0	1	2	3	4	5	6		0	1	2	3	4	5	6		0	1	2	3	4	5	6		0	1	2	3	4	5	6
					39.8896								48.0186								0.099243								49.9597								2.0403								47.9194
					31.3316								44.8488								0.0254398								46.5957								1.77232								44.8233
					31.3316								44.8488								0.0254398								46.5957								1.77232								44.8233
					31.3316								44.8488								0.0254398								46.5957								1.77232								44.8233
					33.0488								43.2763								0.0376385								45.0451								1.80648								43.2387
					39.8896								43.2763								0.0376385								45.0451								1.80648								43.2387
					39.8896								43.2763								0.0376385								45.0451								1.80648								43.2387
					39.8896								48.0186								0.099243								49.9597								2.0403								47.9194
					31.9561								38.1133								0.0801761								40.2671								2.23398								38.0331
					39.008								40.8187								0.0544729								42.73								1.96578								40.7642
					39.008								43.3052								0.187574								45.4245								2.30691								43.1176
					39.008								43.3052								0.187574								45.4245								2.30691								43.1176
					39.8896								45.8076								0.138332								47.7962								2.12684								45.6693
					39.8896								48.0186								0.099243								49.9597								2.0403								47.9194
					39.8896								48.0186								0.099243								49.9597								2.0403								47.9194
					39.8896								45.8076								0.138332								47.7962								2.12684								45.6693
					39.8896								45.8076								0.138332								47.7962								2.12684								45.6693
					39.8896								45.8076								0.138332								47.7962								2.12684								45.6693
					39.8896								45.8076								0.138332								47.7962								2.12684								45.6693
					39.8896								45.8076								0.138332								47.7962								2.12684								45.6693
					39.8896								45.8076								0.138332								47.7962								2.12684								45.6693
					33.0488								43.2763								0.0376385								45.0451								1.80648								43.2387
					31.3316								44.8488								0.0254398								46.5957								1.77232								44.8233
					31.3316								44.8488								0.0254398								46.5957								1.77232								44.8233
					39.008								43.3052								0.187574								45.4245								2.30691								43.1176
		67.303								79.9416								1.29534								81.953								3.30671								78.8361
					39.008								41.149								0.251415								43.4446								2.54694								40.8976
					38.4218								41.149								0.251415								43.4446								2.54694								40.8976
					33.0488								30.9557								0.00172132								32.7619								1.80788								30.954
					25.3578								33.6519								0.000330275								35.3561								1.70458								33.6515
					47.4435								57.4907								0.5121								59.6612								2.6826								56.9786
					47.4435								57.4907								0.5121								59.6612								2.6826								56.9786
					47.4435								57.4907								0.5121								59.6612								2.6826								56.9786
					39.8896								48.0186								0.099243								49.9597								2.0403								47.9194
					39.8896								48.0186								0.099243								49.9597								2.0403								47.9194
					39.8896								48.0186								0.099243								49.9597								2.0403								47.9194
					39.8896								45.8076								0.138332								47.7962								2.12684								45.6693
					33.0488								40.8187								0.0544729								42.73								1.96578								40.7642
					31.3316								44.8488								0.0254398								46.5957								1.77232								44.8233
					39.8896								53.5275								0.145147								55.8496								2.46725								53.3823
					39.8896								51.2924								0.291744								53.3633								2.36272								51.0006
					39.8896								51.2924								0.291744								53.3633								2.36272								51.0006
					47.4435								58.2765								0.381604								60.7427								2.84787								57.8949
					59.4483								63.5329								0.566549								66.2768								3.31046								62.972
					47.4435								58.2765								0.381604								60.7427								2.84787								57.8949
					33.0488								40.8187								0.0544729								42.73								1.96578								40.7642
					39.8896								48.0186								0.099243								49.9597								2.0403								47.9194
					39.8896								45.8076								0.138332								47.7962								2.12684								45.6693
					42.6135								52.1922								0.0865625								54.5892								2.48357								52.1056
					39.008								43.3052								0.187574								45.4245								2.30691								43.1176
					48.4633								56.0153								0.637761								57.9445								2.56703								55.3775
					48.4633								64.0362								0.91981								65.9966								2.88021								63.1248
					39.008								49.1478								0.375713								51.1713								2.39921								48.7721
					30.8187								33.9148								0.190079								36.5889								2.86422								33.7247
			279.531								130.788								63.129								76.3491								8.69018								69.7978
			541.184								287.171								200.842								120.048								33.7189								88.4703
			541.184								287.171								200.842								120.048								33.7189								88.4703
				5290.36								2843.08								2612.45								699.066								468.433								233.905
				5290.36								3890.62								3607.75								909.809								626.939								287.054
				2795.39								2776.63								2533.66								702.265								459.287								246.885
				2795.39								2776.63								2533.66								702.265								459.287								246.885
				5538.77								3858.25								3560.52								908.091								610.36								303.024
				3827								4374.67								4116.7								921.442								663.469								261.151
				2915.05								2929.86								2710.46								689.929								470.525								222.359
				2915.05								2929.86								2710.46								689.929								470.525								222.359
			541.184								441.972								337.582								166.353								61.9622								106.763
			541.184								254.401								165.481								117.83								28.9107								91.3719
			541.184								254.401								165.481								117.83								28.9107								91.3719
			541.184								174.179								98.2647								91.5307								15.6161								78.2069
			541.184								174.179								98.2647								91.5307								15.6161								78.2069
						71.0605								75.8432								1.28694								78.9737								4.41739								75.4472
						60.2192								48.0532								5.47417								47.1021								4.52304								42.886
						80.0959								83.3068								1.20332								87.373								5.26943								83.1036
						91.4913								97.6809								1.51929								103.978								7.81687								96.924
						72.9756								70.1046								1.4984								72.3699								3.76376								69.2553
						69.1847								65.8078								2.70798								67.4257								4.32593								63.6459
						69.1847								65.8078								2.70798								67.4257								4.32593								63.6459
						69.1847								65.8078								2.70798								67.4257								4.32593								63.6459
						70.4153								63.1362								5.11955								62.4678								4.45113								58.5005
						70.4153								61.316								3.89244								60.996								3.57242								57.8318
						70.4153								63.1362								5.11955								62.4678								4.45113								58.5005
						69.1847								61.316								3.89244								60.996								3.57242								57.8318
						91.4913								84.8365								1.24935								88.9575								5.37031								84.4849
						78.3816								84.8365								1.24935								88.9575								5.37031								84.4849
						69.1847								70.9943								1.61059								73.8034								4.41973								70.0121
						69.1847								70.9943								1.61059								73.8034								4.41973								70.0121
						69.1847								70.9943								1.61059								73.8034								4.41973								70.0121
						69.1847								70.9943								1.61059								73.8034								4.41973								70.0121
						69.1847								64.5544								2.2346								65.8051								3.48525								62.8328
						69.1847								64.5544								2.2346								65.8051								3.48525								62.8328
						80.2617								54.4569								10.7814								48.6221								4.94659								43.9169
						80.2617								54.4569								10.7814								48.6221								4.94659								43.9169
						80.2617								54.4569								10.7814								48.6221								4.94659								43.9169
						80.0959								75.8432								1.28694								78.9737								4.41739								75.4472
						80.0959								75.8432								1.28694								78.9737								4.41739								75.4472
						68.5315								66.8895								1.42703								69.3711								3.90861								66.2475
						68.5315								73.7847								1.26689								77.1653								4.64748								73.4436
						80.0959								73.7847								1.26689								77.1653								4.64748								73.4436
						94.9018								95.5008								1.78664								103.172								9.45833								94.243
						80.0959								83.3068								1.20332								87.373								5.26943								83.1036
						80.0959								83.3068								1.20332								87.373								5.26943								83.1036
						68.5315								66.8895								1.42703								69.3711								3.90861								66.2475
						72.9756								58.7989								3.00363								58.7218								2.92655								56.1906
						91.4913								97.6809								1.51929								103.978								7.81687								96.924
						72.9756								64.5544								2.2346								65.8051								3.48525								62.8328
						72.9756								64.5544								2.2346								65.8051								3.48525								62.8328
						72.9756								64.5544								2.2346								65.8051								3.48525								62.8328
						72.9756								64.5544								2.2346								65.8051								3.48525								62.8328
						80.0959								75.8432								1.28694								78.9737								4.41739								75.4472
						72.9756								64.5544								2.2346								65.8051								3.48525								62.8328
						72.9756								64.5544								2.2346								65.8051								3.48525								62.8328
						72.9756								61.316								3.89244								60.996								3.57242								57.8318
						72.9756								61.316								3.89244								60.996								3.57242								57.8318
						72.9756								61.316								3.89244								60.996								3.57242								57.8318
						88.1112								61.0889								7.31566								57.7163								3.94311								54.1127
						79.5914								90.1052								1.23628								94.4065								5.53759								89.9393
						71.3886								50.5319								3.08585								50.7506								3.30456								47.8865
						195.428								58.7156								17.0325								50.5829								8.89972								41.9984
						71.3886								49.3363								3.23257								50.1545								4.05078								46.5242
						71.3886								49.3363								3.23257								50.1545								4.05078								46.5242
						71.3886								49.3363								3.23257								50.1545								4.05078								46.5242
						60.2192								50.8924								2.12241								53.3414								4.57144								49.256
						60.2192								56.7564								1.61944								59.5435								4.40648								55.7691
						60.2192								53.9339								1.53567								57.4432								5.04494								52.98
						63.1012								61.9593								1.35686								65.4564								4.85394								61.3566
						63.1012								53.9339								1.53567								57.4432								5.04494								52.98
						63.1012								68.7367								1.24231								72.4535								4.9591								68.3647
						88.1112								61.0889								7.31566								57.7163								3.94311								54.1127
						72.9756								61.316								3.89244								60.996								3.57242								57.8318
						72.9756								64.5544								2.2346								65.8051								3.48525								62.8328
						72.9756								64.5544								2.2346								65.8051								3.48525								62.8328
						72.9756								64.5544								2.2346								65.8051								3.48525								62.8328
						72.9756								64.5544								2.2346								65.8051								3.48525								62.8328
						72.9756								64.5544								2.2346								65.8051								3.48525								62.8328
						94.1377								90.8428								1.19717								95.6339								5.98834								90.6922
						94.1377								90.8428								1.19717								95.6339								5.98834								90.6922
						88.1112								61.0889								7.31566								57.7163								3.94311								54.1127
						88.1112								61.0889								7.31566								57.7163								3.94311								54.1127
						72.9756								61.316								3.89244								60.996								3.57242								57.8318
						72.9756								61.316								3.89244								60.996								3.57242								57.8318
						72.9756								61.316								3.89244								60.996								3.57242								57.8318
						72.9756								64.5544								2.2346								65.8051								3.48525								62.8328
						72.9756								64.5544								2.2346								65.8051								3.48525								62.8328
						72.9756								61.316								3.89244								60.996								3.57242								57.8318
						72.9756								61.316								3.89244								60.996								3.57242								57.8318
						72.9756								64.5544								2.2346								65.8051								3.48525								62.8328
						72.9756								64.5544								2.2346								65.8051								3.48525								62.8328
						72.9756								61.316								3.89244								60.996								3.57242								57.8318
						72.9756								64.5544								2.2346								65.8051								3.48525								62.8328
						72.9756								61.316								3.89244								60.996								3.57242								57.8318
						72.9756								61.316								3.89244								60.996								3.57242								57.8318
						72.9756								61.316								3.89244								60.996								3.57242								57.8318
						72.9756								61.316								3.89244								60.996								3.57242								57.8318
						72.9756								61.316								3.89244								60.996								3.57242								57.8318
						72.9756								58.7989								3.00363								58.7218								2.92655								56.1906
						71.0605								68.7531								1.45925								70.8995								3.6057								68.0226
						59.699								47.1779								3.2545								48.7069								4.78345								44.2566
						59.699								47.1779								3.2545								48.7069								4.78345								44.2566
						50.8197								44.0174								3.02202								46.4632								5.46786								41.2203
						49.4061								40.4084								2.50492								43.8014								5.89786								38.0471
						49.4061								40.4084								2.50492								43.8014								5.89786								38.0471
						49.4061								40.4084								2.50492								43.8014								5.89786								38.0471
						49.4061								38.5124								4.39448								41.0925								6.97449								34.1826
						80.0959								91.7862								1.27295								96.8595								6.34623								91.4563
						68.5315								73.7847								1.26689								77.1653								4.64748								73.4436
						68.5315								64.5612								1.40605								67.5555								4.4003								63.9369
						68.5315								64.5612								1.40605								67.5555								4.4003								63.9369
						59.699								49.0732								9.43708								45.2052								5.56916								39.8264
						50.8197								44.0174								3.02202								46.4632								5.46786								41.2203
						59.699								48.0532								5.47417								47.1021								4.52304								42.886
						71.0605								68.7531								1.45925								70.8995								3.6057								68.0226
						94.1377								97.5417								1.33698								103.398								7.19349								97.1326
						94.1377								97.5417								1.33698								103.398								7.19349								97.1326
						94.1377								97.5417								1.33698								103.398								7.19349								97.1326
						94.1377								101.482								1.43235								107.83								7.78031								100.918
						94.1377								97.5417								1.33698								103.398								7.19349								97.1326
						78.3816								85.567								1.21856								90.0228								5.67435								85.1231
						94.1377								97.5417								1.33698								103.398								7.19349								97.1326
						94.1377								97.5417								1.33698								103.398								7.19349								97.1326
						94.1377								97.5417								1.33698								103.398								7.19349								97.1326
						94.1377								101.482								1.43235								107.83								7.78031								100.918
						80.0959								75.8432								1.28694								78.9737								4.41739								75.4472
						80.0959								83.3068								1.20332								87.373								5.26943								83.1036
						80.0959								91.7862								1.27295								96.8595								6.34623								91.4563
						80.0959								97.5417								1.33698								103.398								7.19349								97.1326
						80.0959								91.7862								1.27295								96.8595								6.34623								91.4563
						80.0959								91.7862								1.27295								96.8595								6.34623								91.4563
						80.0959								91.7862								1.27295								96.8595								6.34623								91.4563
						71.0605								84.8365								1.24935								88.9575								5.37031								84.4849
						71.0605								84.8365								1.24935								88.9575								5.37031								84.4849
						71.0605								84.8365								1.24935								88.9575								5.37031								84.4849
						80.0959								84.8365								1.24935								88.9575								5.37031								84.4849
						80.0959								75.8432								1.28694								78.9737								4.41739								75.4472
						80.0959								75.8432								1.28694								78.9737								4.41739								75.4472
						80.0959								75.8432								1.28694								78.9737								4.41739								75.4472
						80.0959								75.8432								1.28694								78.9737								4.41739								75.4472
						80.0959								75.8432								1.28694								78.9737								4.41739								75.4472
						72.9756								70.1046								1.4984								72.3699								3.76376								69.2553
						72.9756								70.1046								1.4984								72.3699								3.76376								69.2553
						72.9756								70.1046								1.4984								72.3699								3.76376								69.2553
						72.9756								64.5544								2.2346								65.8051								3.48525								62.8328
						72.9756								64.5544								2.2346								65.8051								3.48525								62.8328
						72.9756								70.1046								1.4984								72.3699								3.76376								69.2553
						72.9756								70.1046								1.4984								72.3699								3.76376								69.2553
						72.9756								70.1046								1.4984								72.3699								3.76376								69.2553
						71.0605								70.1046								1.4984								72.3699								3.76376								69.2553
						71.0605								70.1046								1.4984								72.3699								3.76376								69.2553
						71.0605								77.2638								1.27923								80.4158								4.43128								76.7752
						71.0605								77.2638								1.27923								80.4158								4.43128								76.7752
						71.0605								77.2638								1.27923								80.4158								4.43128								76.7752
						72.9756								70.1046								1.4984								72.3699								3.76376								69.2553
						72.9756								64.5544								2.2346								65.8051								3.48525								62.8328
						72.9756								64.5544								2.2346								65.8051								3.48525								62.8328
						72.9756								64.5544								2.2346								65.8051								3.48525								62.8328
						72.9756								64.5544								2.2346								65.8051								3.48525								62.8328
						72.9756								64.5544								2.2346								65.8051								3.48525								62.8328
						72.9756								64.5544								2.2346								65.8051								3.48525								62.8328
						72.9756								64.5544								2.2346								65.8051								3.48525								62.8328
						72.9756								64.5544								2.2346								65.8051								3.48525								62.8328
						72.9756								64.5544								2.2346								65.8051								3.48525								62.8328
						72.9756								64.5544								2.2346								65.8051								3.48525								62.8328
						72.9756								70.1046								1.4984								72.3699								3.76376								69.2553
						68.5315								66.8895								1.42703								69.3711								3.90861								66.2475
						68.5315								66.8895								1.42703								69.3711								3.90861								66.2475
						68.5315								66.8895								1.42703								69.3711								3.90861								66.2475
						68.5315								66.8895								1.42703								69.3711								3.90861								66.2475
						80.0959								66.8895								1.42703								69.3711								3.90861								66.2475
						68.5315								66.8895								1.42703								69.3711								3.90861								66.2475
						68.5315								66.8895								1.42703								69.3711								3.90861								66.2475
						68.5315								66.8895								1.42703								69.3711								3.90861								66.2475
						79.5914								71.4618								1.28564								75.0536								4.87742								71.0831
						68.5315								66.8895								1.42703								69.3711								3.90861								66.2475
						60.2192								49.3363								3.23257								50.1545								4.05078								46.5242
						60.2192								49.3363								3.23257								50.1545								4.05078								46.5242
						59.699								48.0532								5.47417								47.1021								4.52304								42.886
						106.846								104.087								1.40072								109.487								6.80047								103.671
						106.846								103.07								1.55885								109.652								8.14056								102.299
						106.846								103.07								1.55885								109.652								8.14056								102.299
						59.699								48.0532								5.47417								47.1021								4.52304								42.886
						66.1209								59.0067								1.68521								61.0672								3.74571								57.9658
						66.1209								59.0067								1.68521								61.0672								3.74571								57.9658
						72.9756								57.4307								5.32714								55.2974								3.19379								52.3921
						72.9756								61.316								3.89244								60.996								3.57242								57.8318
						72.9756								61.316								3.89244								60.996								3.57242								57.8318
						88.1112								61.316								3.89244								60.996								3.57242								57.8318
						88.1112								61.0889								7.31566								57.7163								3.94311								54.1127
						88.1112								61.0889								7.31566								57.7163								3.94311								54.1127
						88.1112								61.0889								7.31566								57.7163								3.94311								54.1127
						80.0959								91.7862								1.27295								96.8595								6.34623								91.4563
						66.1209								60.9427								1.72304								62.4262								3.20648								59.8361
						71.0605								70.1046								1.4984								72.3699								3.76376								69.2553
						66.1209								59.0067								1.68521								61.0672								3.74571								57.9658
						111.509								57.3256								15.7911								50.2632								8.72869								41.9233
						111.509								57.3256								15.7911								50.2632								8.72869								41.9233
						111.509								57.3256								15.7911								50.2632								8.72869								41.9233
						111.509								57.3256								15.7911								50.2632								8.72869								41.9233
						111.509								57.3256								15.7911								50.2632								8.72869								41.9233
						111.509								57.3256								15.7911								50.2632								8.72869								41.9233
						111.509								57.3256								15.7911								50.2632								8.72869								41.9233
						60.2192								53.9339								1.53567								57.4432								5.04494								52.98
						72.8159								54.217								1.04673								58.4746								5.30431								53.7555
						72.8159								54.217								1.04673								58.4746								5.30431								53.7555
						72.8159								64.7936								1.11203								68.643								4.96139								64.4894
						94.9018								88.0347								1.7718								95.5458								9.28288								86.7151
						106.846								101.492								1.69873								108.19								8.3963								100.494
						106.846								108.052								1.60984								113.687								7.24395								107.36
						95.9154								112.77								1.79028								118.003								7.02329								112.014
						94.9018								95.5008								1.78664								103.172								9.45833								94.243
						72.8159								59.9336								0.956183								63.9374								4.95997								59.6871
						72.9756								64.5544								2.2346								65.8051								3.48525								62.8328
						74.418								35.1624								3.62765								38.8786								7.3439								31.5862
						111.509								57.3256								15.7911								50.2632								8.72869								41.9233
						111.509								57.3256								15.7911								50.2632								8.72869								41.9233
						63.1012								53.9339								1.53567								57.4432								5.04494								52.98
						60.2192								50.8924								2.12241								53.3414								4.57144								49.256
						60.2192								53.9339								1.53567								57.4432								5.04494								52.98
						60.2192								53.9339								1.53567								57.4432								5.04494								52.98
						60.2192								50.8924								2.12241								53.3414								4.57144								49.256
						91.4913								97.7242								2.00059								105.961								10.2375								96.1702
						72.8159								72.7485								1.11487								76.3704								4.73678								72.5617
						78.3816								85.567								1.21856								90.0228								5.67435								85.1231
						91.4913								91.7862								1.27295								96.8595								6.34623								91.4563
						91.4913								97.6809								1.51929								103.978								7.81687								96.924
						100.15								99.5292								1.74193								107.063								9.27554								98.3988
						100.15								99.5292								1.74193								107.063								9.27554								98.3988
						100.15								95.5008								1.78664								103.172								9.45833								94.243
						94.9018								95.5008								1.78664								103.172								9.45833								94.243
						69.1847								61.316								3.89244								60.996								3.57242								57.8318
						100.15								100.183								1.65069								107.246								8.71441								99.2269
						91.4913								97.6809								1.51929								103.978								7.81687								96.924
						91.4913								97.6809								1.51929								103.978								7.81687								96.924
						91.4913								97.6809								1.51929								103.978								7.81687								96.924
						91.4913								97.6809								1.51929								103.978								7.81687								96.924
						91.4913								97.6809								1.51929								103.978								7.81687								96.924
						91.4913								92.5743								1.3651								97.9544								6.7452								92.0027
						91.4913								97.6809								1.51929								103.978								7.81687								96.924
						91.4913								97.6809								1.51929								103.978								7.81687								96.924
						91.4913								97.6809								1.51929								103.978								7.81687								96.924
						91.4913								99.3861								1.8565								106.959								9.42894								98.0703
						91.4913								97.6809								1.51929								103.978								7.81687								96.924
						100.15								92.133								2.02547								100.693								10.5858								90.4714
						100.15								97.7242								2.00059								105.961								10.2375								96.1702
						94.1377								101.482								1.43235								107.83								7.78031								100.918
						100.15								97.5417								1.33698								103.398								7.19349								97.1326
						91.4913								91.7862								1.27295								96.8595								6.34623								91.4563
						91.4913								91.7862								1.27295								96.8595								6.34623								91.4563
						80.0959								91.7862								1.27295								96.8595								6.34623								91.4563
						69.1847								77.9043								1.19426								82.3159								5.6059								77.4186
						69.1847								77.8911								1.20988								81.5405								4.85935								77.3938
						70.4153								66.1924								3.40931								68.015								5.23183								63.4061
						70.4153								66.1924								3.40931								68.015								5.23183								63.4061
						88.1112								61.0889								7.31566								57.7163								3.94311								54.1127
						69.1847								64.5544								2.2346								65.8051								3.48525								62.8328
						88.1112								61.316								3.89244								60.996								3.57242								57.8318
						88.1112								61.316								3.89244								60.996								3.57242								57.8318
						88.1112								61.0889								7.31566								57.7163								3.94311								54.1127
						80.0959								75.8432								1.28694								78.9737								4.41739								75.4472
						60.2192								49.3363								3.23257								50.1545								4.05078								46.5242
						60.2192								53.9339								1.53567								57.4432								5.04494								52.98
						60.2192								50.8924								2.12241								53.3414								4.57144								49.256
						60.2192								49.3363								3.23257								50.1545								4.05078								46.5242
						71.3886								49.1367								5.06605								47.8962								3.82553								44.4596
						72.8159								64.7936								1.11203								68.643								4.96139								64.4894
						63.1012								47.9641								2.03268								51.2129								5.28147								46.3249
						60.2192								53.9339								1.53567								57.4432								5.04494								52.98
						50.8197								54.217								1.04673								58.4746								5.30431								53.7555
						59.699								48.0532								5.47417								47.1021								4.52304								42.886
						68.5315								66.8895								1.42703								69.3711								3.90861								66.2475
						68.5315								66.8895								1.42703								69.3711								3.90861								66.2475
						68.5315								66.8895								1.42703								69.3711								3.90861								66.2475
						72.9756								64.5544								2.2346								65.8051								3.48525								62.8328
						72.9756								64.5544								2.2346								65.8051								3.48525								62.8328
						49.4061								40.4084								2.50492								43.8014								5.89786								38.0471
						88.1112								61.316								3.89244								60.996								3.57242								57.8318
						60.2192								53.0181								2.15713								54.6622								3.80122								51.3854
						72.9756								62.7721								1.89721								63.9387								3.06385								61.424
						71.0605								70.1046								1.4984								72.3699								3.76376								69.2553
						72.9756								58.7989								3.00363								58.7218								2.92655								56.1906
						72.9756								64.5544								2.2346								65.8051								3.48525								62.8328
						72.9756								64.5544								2.2346								65.8051								3.48525								62.8328
						79.5914								81.6027								1.2119								85.6169								5.22611								81.4146
						79.5914								81.6027								1.2119								85.6169								5.22611								81.4146
						72.9756								64.5544								2.2346								65.8051								3.48525								62.8328
						72.9756								64.5544								2.2346								65.8051								3.48525								62.8328
						66.1209								59.0067								1.68521								61.0672								3.74571								57.9658
						66.1209								59.0067								1.68521								61.0672								3.74571								57.9658
						66.1209								59.0067								1.68521								61.0672								3.74571								57.9658
						68.5315								66.8895								1.42703								69.3711								3.90861								66.2475
						80.0959								83.3068								1.20332								87.373								5.26943								83.1036
						68.5315								66.8895								1.42703								69.3711								3.90861								66.2475
						80.0959								83.3068								1.20332								87.373								5.26943								83.1036
						80.0959								73.7847								1.26689								77.1653								4.64748								73.4436
						100.15								103.07								1.55885								109.652								8.14056								102.299
						80.0959								84.8365								1.24935								88.9575								5.37031								84.4849
						100.15								103.07								1.55885								109.652								8.14056								102.299
						80.0959								75.8432								1.28694								78.9737								4.41739								75.4472
						71.0605								77.2638								1.27923								80.4158								4.43128								76.7752
						111.509								57.3256								15.7911								50.2632								8.72869								41.9233
						111.509								70.3273								29.2767								60.0987								19.0481								41.4417
						111.509								70.3273								29.2767								60.0987								19.0481								41.4417
						111.509								70.3273								29.2767								60.0987								19.0481								41.4417
						60.2192								53.0181								2.15713								54.6622								3.80122								51.3854
						71.3886								49.1367								5.06605								47.8962								3.82553								44.4596
						60.2192								49.3363								3.23257								50.1545								4.05078								46.5242
						60.2192								56.7564								1.61944								59.5435								4.40648								55.7691
						60.2192								50.8924								2.12241								53.3414								4.57144								49.256
						63.1012								53.9339								1.53567								57.4432								5.04494								52.98
						60.2192								53.9339								1.53567								57.4432								5.04494								52.98
						63.1012								68.7367								1.24231								72.4535								4.9591								68.3647
						63.1012								68.7367								1.24231								72.4535								4.9591								68.3647
						63.1012								61.9593								1.35686								65.4564								4.85394								61.3566
						63.1012								61.9593								1.35686								65.4564								4.85394								61.3566
						52.5213								46.2641								1.08546								50.7839								5.60522								45.5463
						52.5213								46.2641								1.08546								50.7839								5.60522								45.5463
						59.699								48.0532								5.47417								47.1021								4.52304								42.886
						59.699								47.1779								3.2545								48.7069								4.78345								44.2566
						59.699								47.1779								3.2545								48.7069								4.78345								44.2566
							1140.48								279.242								242.059								336.293								299.11								37.2245
							1140.48								279.242								242.059								336.293								299.11								37.2245
							495.517								482.51								444.949								665.89								628.329								37.5623
							1265.65								543.268								505.468								765.018								727.218								37.8001
								2616.92								1043.32								996.527								1557.64								1510.85								46.796
								1522.86								525.024								488.944								750.298								714.218								36.0799
								2889.11								1253.88								1201.74								1894.8								1842.65								52.1417
								4278.92								1253.44								1199.56								1919.05								1865.17								53.8792
								3212.65								786.142								742.797								1198.49								1155.14								43.345
								3212.65								786.142								742.797								1198.49								1155.14								43.345
								3212.65								786.142								742.797								1198.49								1155.14								43.345
								3212.65								786.142								742.797								1198.49								1155.14								43.345
								3212.65								545.672								509.495								831.673								795.495								36.1771
								1522.86								786.142								742.797								1198.49								1155.14								43.345
		4451.02								1757.31								1689.33								2796.75								2728.77								67.974
		4673.44								1441.51								1374.82								2283.94								2217.25								66.6903
						80.0959								66.8895								1.42703								69.3711								3.90861								66.2475
						68.5315								73.7847								1.26689								77.1653								4.64748								73.4436
						80.0959								73.7847								1.26689								77.1653								4.64748								73.4436
						68.5315								53.0181								2.15713								54.6622								3.80122								51.3854
						60.2192								61.9593								1.35686								65.4564								4.85394								61.3566
						79.5914								71.4618								1.28564								75.0536								4.87742								71.0831
						79.5914								81.6027								1.2119								85.6169								5.22611								81.4146
						80.0959								75.8432								1.28694								78.9737								4.41739								75.4472
						68.5315								53.0181								2.15713								54.6622								3.80122								51.3854
						80.0959								75.8432								1.28694								78.9737								4.41739								75.4472
						80.0959								75.8432								1.28694								78.9737								4.41739								75.4472
						80.0959								75.8432								1.28694								78.9737								4.41739								75.4472
						80.0959								75.8432								1.28694								78.9737								4.41739								75.4472
						80.0959								75.8432								1.28694								78.9737								4.41739								75.4472
						80.0959								73.7847								1.26689								77.1653								4.64748								73.4436
						80.0959								83.3068								1.20332								87.373								5.26943								83.1036
						80.0959								83.3068								1.20332								87.373								5.26943								83.1036
						68.5315								66.8895								1.42703								69.3711								3.90861								66.2475
						80.0959								73.7847								1.26689								77.1653								4.64748								73.4436
						68.5315								73.7847								1.26689								77.1653								4.64748								73.4436
						80.0959								73.7847								1.26689								77.1653								4.64748								73.4436
						79.5914								71.4618								1.28564								75.0536								4.87742								71.0831
						79.5914								71.4618								1.28564								75.0536								4.87742								71.0831
						80.0959								84.8365								1.24935								88.9575								5.37031								84.4849
						80.0959								84.8365								1.24935								88.9575								5.37031								84.4849
						79.5914								90.1052								1.23628								94.4065								5.53759								89.9393
						79.5914								81.6027								1.2119								85.6169								5.22611								81.4146
						79.5914								81.6027								1.2119								85.6169								5.22611								81.4146
						79.5914								79.6999								1.25926								83.4861								5.04546								79.4419
						79.5914								77.0623								1.23052								80.6353								4.80352								76.805
						79.5914								79.6999								1.25926								83.4861								5.04546								79.4419
						79.5914								79.6999								1.25926								83.4861								5.04546								79.4419
						79.5914								79.6999								1.25926								83.4861								5.04546								79.4419
						80.0959								83.3068								1.20332								87.373								5.26943								83.1036
						68.5315								73.7847								1.26689								77.1653								4.64748								73.4436
						68.5315								73.7847								1.26689								77.1653								4.64748								73.4436
						68.5315								66.8895								1.42703								69.3711								3.90861								66.2475
						68.5315								73.7847								1.26689								77.1653								4.64748								73.4436
						80.0959								66.8895								1.42703								69.3711								3.90861								66.2475
						80.0959								83.3068								1.20332								87.373								5.26943								83.1036
						95.9154								98.8448								1.34561								103.217								5.71756								98.5738
						106.846								104.087								1.40072								109.487								6.80047								103.671
						60.2192								56.7564								1.61944								59.5435								4.40648								55.7691
						66.1209								66.8895								1.42703								69.3711								3.90861								66.2475
						66.1209								66.8895								1.42703								69.3711								3.90861								66.2475
						68.5315								64.5612								1.40605								67.5555								4.4003								63.9369
						72.9756								62.7721								1.89721								63.9387								3.06385								61.424
						72.9756								64.5544								2.2346								65.8051								3.48525								62.8328
						72.9756								64.5544								2.2346								65.8051								3.48525								62.8328
						94.9018								95.5008								1.78664								103.172								9.45833								94.243
						80.0959								84.8365								1.24935								88.9575								5.37031								84.4849
						80.0959								75.8432								1.28694								78.9737								4.41739								75.4472
						94.9018								103.07								1.55885								109.652								8.14056								102.299
						95.9154								86.7043								1.30274								90.1813								4.77973								86.4691
						95.9154								89.0561								1.31492								92.7734								5.03222								88.8049
						88.1112								61.0889								7.31566								57.7163								3.94311								54.1127
						113.907								108.296								1.64716								112.683								6.0346								107.796
						113.907								108.296								1.64716								112.683								6.0346								107.796
						113.907								112.77								1.79028								118.003								7.02329								112.014
						106.846								108.052								1.60984								113.687								7.24395								107.36
						106.846								108.052								1.60984								113.687								7.24395								107.36
						106.846								104.087								1.40072								109.487								6.80047								103.671
						106.846								104.087								1.40072								109.487								6.80047								103.671
						106.846								104.087								1.40072								109.487								6.80047								103.671
						106.846								108.052								1.60984								113.687								7.24395								107.36
						106.846								108.052								1.60984								113.687								7.24395								107.36
						106.846								112.77								1.79028								118.003								7.02329								112.014
						95.9154								98.8448								1.34561								103.217								5.71756								98.5738
						100.15								99.5292								1.74193								107.063								9.27554								98.3988
						113.907								108.296								1.64716								112.683								6.0346								107.796
						113.907								115.952								1.86715								121.471								7.38691								115.258
						113.907								115.952								1.86715								121.471								7.38691								115.258
						113.907								115.952								1.86715								121.471								7.38691								115.258
						113.907								115.952								1.86715								121.471								7.38691								115.258
						113.907								115.952								1.86715								121.471								7.38691								115.258
						113.907								115.952								1.86715								121.471								7.38691								115.258
						113.907								107.239								1.59956								112.004								6.36438								106.858
						113.907								115.952								1.86715								121.471								7.38691								115.258
						113.907								107.239								1.59956								112.004								6.36438								106.858
						59.9551								62.2168								0.880819								65.8264								4.49039								62.0578
						113.907								115.516								2.03796								121.788								8.31078								114.483
						113.907								115.516								2.03796								121.788								8.31078								114.483
						113.907								115.516								2.03796								121.788								8.31078								114.483
						113.907								115.516								2.03796								121.788								8.31078								114.483
						123.969								119.838								2.32223								127.386								9.87032								118.663
						123.969								107.667								2.37853								115.267								9.97879								106.201
						94.1377								90.8428								1.19717								95.6339								5.98834								90.6922
						94.1377								90.8428								1.19717								95.6339								5.98834								90.6922
						106.846								103.07								1.55885								109.652								8.14056								102.299
						94.9018								103.07								1.55885								109.652								8.14056								102.299
						123.969								115.166								1.80117								121.059								7.69388								114.607
	Median	4451.02	541.184	3371.03	39.8896	72.9756	1140.48	3212.65		1441.51	254.401	2929.86	45.8076	67.8131	380.876	786.142		1374.82	165.481	2710.46	0.138332	1.59956	343.504	742.797		2283.94	117.83	702.265	47.7962	69.3711	501.091	1198.49		2217.25	28.9107	470.525	2.12684	4.64748	463.719	1155.14		67.974	88.4703	246.885	45.6693	66.2475	37.3934	43.345
	Q1	67.303	541.184	2825.31	33.0488	69.1847	656.757	2343.41		79.9416	174.179	2793.24	43.2907	61.316	279.242	726.025		1.29534	98.2647	2553.35	0.0544729	1.28694	242.059	684.472		81.953	91.5307	692.213	45.2348	60.996	336.293	1106.78		3.30671	15.6161	461.574	1.96578	3.88784	299.11	1065.23		66.6903	78.2069	225.245	43.1781	57.8318	37.2245	41.553
	Q3	4673.44	541.184	5290.36	39.8896	91.4913	1234.36	3212.65		1757.31	287.171	3882.53	48.5832	85.8513	528.079	1095.85		1689.33	200.842	3595.94	0.220747	2.2346	490.339	1047.28		2796.75	120.048	909.379	50.5655	90.0624	740.236	1641.93		2728.77	33.7189	622.794	2.43323	6.34623	702.496	1593.8		78.8361	91.3719	280.578	48.3457	85.4596	37.7406	48.1324
	n	3	8	8	53	398	4	10		3	8	8	53	398	4	10		3	8	8	53	398	4	10		3	8	8	53	398	4	10		3	8	8	53	398	4	10		3	8	8	53	398	4	10
	Minimum	67.303	279.531	2795.39	25.3578	49.4061	495.517	1522.86		79.9416	130.788	2776.63	30.9557	35.1624	279.242	525.024		1.29534	63.129	2533.66	0.000330275	0.880819	242.059	488.944		81.953	76.3491	689.929	32.7619	38.8786	336.293	750.298		3.30671	8.69018	459.287	1.70458	2.92655	299.11	714.218		66.6903	69.7978	222.359	30.954	31.5862	37.2245	36.0799
	Maximum	4673.44	541.184	5538.77	59.4483	195.428	1265.65	4278.92		1757.31	441.972	4374.67	64.0362	119.838	543.268	1253.88		1689.33	337.582	4116.7	0.91981	29.2767	505.468	1201.74		2796.75	166.353	921.442	66.2768	127.386	765.018	1919.05		2728.77	61.9622	663.469	3.31046	19.0481	727.218	1865.17		78.8361	106.763	303.024	63.1248	118.663	37.8001	53.8792
